1 **Herbarium-based phylogenomics reveals that the Andes are a biogeographic barrier for**  
2 ***Otoba* (Myristicaceae), an ecologically dominant Neotropical tree genus**

3

4

5 Laura Frost<sup>1</sup>, Daniel A. Santamaría-Aguilar<sup>1</sup>, Daisy Singletary<sup>1</sup>, & Laura P. Lagomarsino<sup>1,2</sup>

6

7 <sup>1</sup>Shirley C. Tucker Herbarium, Department of Biological Sciences, Louisiana State University,  
8 Baton Rouge, LA 70808, USA

9 <sup>2</sup>Author for correspondence (e-mail: [llaogmarsino1@lsu.edu](mailto:llaogmarsino1@lsu.edu))

10

11

12 **Abstract**

13 • Premise of the study — Universal probesets for targeted sequence capture have facilitated  
14 phylogenomic research into diverse plant groups with limited genomic resources, including from  
15 low-quality DNA typical of herbarium specimens. Here, we leverage the Angiosperms353 loci to  
16 infer the first phylogeny of *Otoba* (Myristicaceae), a Neotropical tree genus that is ecologically  
17 dominant in low-to-mid elevation wet forests, exclusively from herbarium specimens.

18

19 • Methods— We use a combination of Angiosperms353 loci, obtained via targeted sequence  
20 capture, and plastid sequences to resolve the phylogeny of *Otoba* using concatenated and  
21 species tree methods. We subsequently use this phylogeny to infer biogeography and trait  
22 evolution using phylogenetic comparative methods.

23

24 • Key results— Recovery success of loci is correlated with age of herbarium specimens and  
25 average annual precipitation. Despite a large amount of missing data, we resolve the phylogeny  
26 of *Otoba* into three major subclades, each structured by geography. We show that *Otoba*'s  
27 crown radiation occurred on the western slopes of the Andes in the late Miocene, and from  
28 there, migrated into Central America at least twice; the genus was only able to cross to the  
29 eastern slopes of the Andes a single time. Trait evolution has been dynamic across vegetative  
30 and reproductive traits, with multiple origins of most discrete traits investigated, including  
31 ecologically important aril color.

32

33 • Conclusions — *Otoba* is recent, rapid radiation whose evolution is tied to landscape change,  
34 including Andean uplift, in the northern Neotropics. Its dynamic morphological evolution is  
35 consistent with sorting of ancestral traits during recent speciation events. In one of the first  
36 herbariomic studies exclusively using herbarium tissue from specimens collected in the wet  
37 tropics, this study demonstrates the promise of Angiosperms353 loci in resolving shallow  
38 species-level relationships, even from low-quality DNA.

39

40 **Keywords**

41 Amazonia; Chocó; herbariomics; Magnoliales; museum-based research; natural history  
42 collections; Neotropics; phylogeny; seed dispersal

43

44           The Northern Neotropics experience a dramatic recent geological history, punctuated by  
45 periods of rapid mountain uplift in the Andes (Hoorn et al., 2010) and Central America (De Boer  
46 et al., 1995) and a potentially gradual closing of the Isthmus of Panama (Bacon et al., 2015;  
47 O’Dea et al., 2016). Among the more notable geographic features of the Neotropics are the  
48 Andean mountains of western South America, the longest north-to-south oriented mountain  
49 chain in the world and the second tallest of any globally. These mountains began their rise in  
50 the Paleocene, but major bursts of mountain building occurred more recently, 4 to 12 My ago.  
51 This uplift not only changed local topography, but also impacted continental-scale climate and  
52 the entire landscape of the Neotropics (Hoorn et al., 2010). It is thus not surprising that the  
53 Andes are known to be important in structuring biogeography and species relationships in plants  
54 that occur in montane Andean habitats (Pennington et al., 2010; Särkinen, Pennington, et al.,  
55 2012; Lagomarsino et al., 2016; Hoorn et al., 2019), as well as in extra-Andean plants, including  
56 lowland tropical rainforest plants of the Amazon basin (Antonelli et al., 2009; Dick et al., 2012).

57           Both the Isthmus of Panama and the Andean mountains are important geological  
58 features of the northern Neotropics that promote speciation in allopatry following long distance  
59 dispersal (Gentry, 1982; Antonelli et al., 2009). Given their height and extreme habitat  
60 heterogeneity, the Andean mountains are a particularly important barrier to species movement,  
61 especially to tropical species that typically have relatively limited environmental preferences  
62 (Janzen, 1967). While there are widespread species that occur on either side of the Andes,  
63 including *Cordia alliodora* (Boraginaceae) (Rymer et al., 2013), *Symphonia globulifera*  
64 (Clusiaceae) (Dick and Heuertz, 2008), and *Schizolobium parahyba* (Fabaceae) (Turchetto-  
65 Zolet et al., 2012), it is more common that genera, not species, have trans-Andean distributions.  
66 Many of these groups are also found in Central America, which may have been facilitated by the  
67 closing of the Isthmus of Panama between 3 and 15 Mya (Coates and Stallard, 2013; Bacon et  
68 al., 2015). Myristicaceae, a pantropical family of mid-canopy and canopy trees with high species  
69 richness in the Neotropics (ter Steege et al., 2006), includes multiple genera with trans-Andean  
70 distributions.

71           Across their full diversity (comprising 21 genera and ca. 500 species), Myristicaceae are  
72 notable for their importance in ethnobotany, including as food plants (e.g., nutmeg and mace,  
73 *Myristica fragrans*), timber species (e.g., *Virola surinamensis*), and hallucinogenic drugs (e.g.,  
74 epená, *Virola* sp. (Alrashedy and Molina, 2016)). Myristicaceae also have multidimensional  
75 ecological importance. For example, due to their large, arillate seeds, they are some of the most  
76 important food sources in the lowland tropics for large-bodied birds, such as toucans and mot-  
77 mots, primates, and bats, which, in turn, act as important seed dispersers (Forget et al., 2000;

78 Russo, 2003; Giraldo et al., 2007; Melo et al., 2009; Moreira et al., 2017). Though pollination is  
79 less well studied, the small, usually imperfect flowers, of which thousands can be in bloom at a  
80 single time on an individual plant (Kanstrup and Olesen, 2000), are known to be generalist  
81 pollinated by various small insects including beetles, flies, and thrips in *Myristica* (Armstrong  
82 and Irvine, 1989; Sharma and Armstrong, 2013), *Virola* (Jardim and Mota, 2007). A similar set  
83 of small, generalist pollinators is likely common throughout the distribution of the family.  
84 Myristicaceae are usually dioecious, with individual plants producing either carpellate or  
85 staminate flowers, which results in differential resource allocation, with pistillate plants (which  
86 give rise to the fruit) investing more in stem growth than staminate plants (Queenborough et al.,  
87 2007a). Further, the six Neotropical genera of Myristicaceae, *Bicuiba*, *Compsonoura*,  
88 *Iryanthera*, *Osteophloeum*, *Otoba*, and *Virola*, are important components of wet tropical forests  
89 at low to mid-elevations, and individual species can be among the most abundant in lowland  
90 tropical rainforests (ter Steege et al., 2006). Neotropical Myristicaceae are an important system  
91 for understanding the ecological processes that allow species co-existence in hyperdiverse  
92 communities in the western Amazon Basin (Queenborough et al., 2007b; c).

93 Despite its relatively low species richness, *Otoba* (Fig. 1) has among the broadest  
94 ecological tolerances of all Neotropical Myristicaceae. This genus of ca. 10 species are  
95 distributed from Nicaragua to Brazil, with the highest species richness in low Andean montane  
96 forests and lowland rainforests, especially of the Chocó region and western Amazon  
97 (Santamaría-Aguilar, Jiménez, et al., 2019). They are abundant in low Andean montane forest,  
98 and include the highest elevation occurrence of any member of Myristicaceae (Jaramillo-  
99 Vivanco and Balslev, 2020). However, species can also be found in lowland rainforests, and  
100 *Otoba* is one of the ten most abundant genera in western Amazonia (ter Steege et al., 2006;  
101 Guevara Andino et al., 2017). Individual species can be some of the most common in many  
102 forests, including *O. parvifolia* in Madre de Díos, Peru (Pitman et al., 2017; Swamy, 2017) and  
103 Madidí, Bolivia (Macía, 2008), *O. glycyarpa* in Yasuní, Ecuador (Guevara Andino et al., 2017),  
104 and high várzea forest of the Amazonian floodplain in Brazil and Bolivia (Wittmann et al., 2006).  
105 *Otoba parvifolia*, a wide-spread species of the Western Amazon, shows high intraspecific  
106 genetic differentiation (Honorio Coronado et al., 2019).

107 *Otoba* is distinct among Myristicaceae in many regards. Like other members of the  
108 nutmeg family, *Otoba* is characterized by a strong aromatic scent from essential oils, a pagoda-  
109 like growth form (i.e., “Myristicaceous growth”, or Massart’s model (Hallé et al., 1978)),  
110 dioeciousness with small, trimerous flowers (Armstrong and Tucker, 1986) (Fig. 1A-C), red,  
111 dilute latex (Fig. H), and a characteristic valvate capsule that opens to reveal a large, arillate



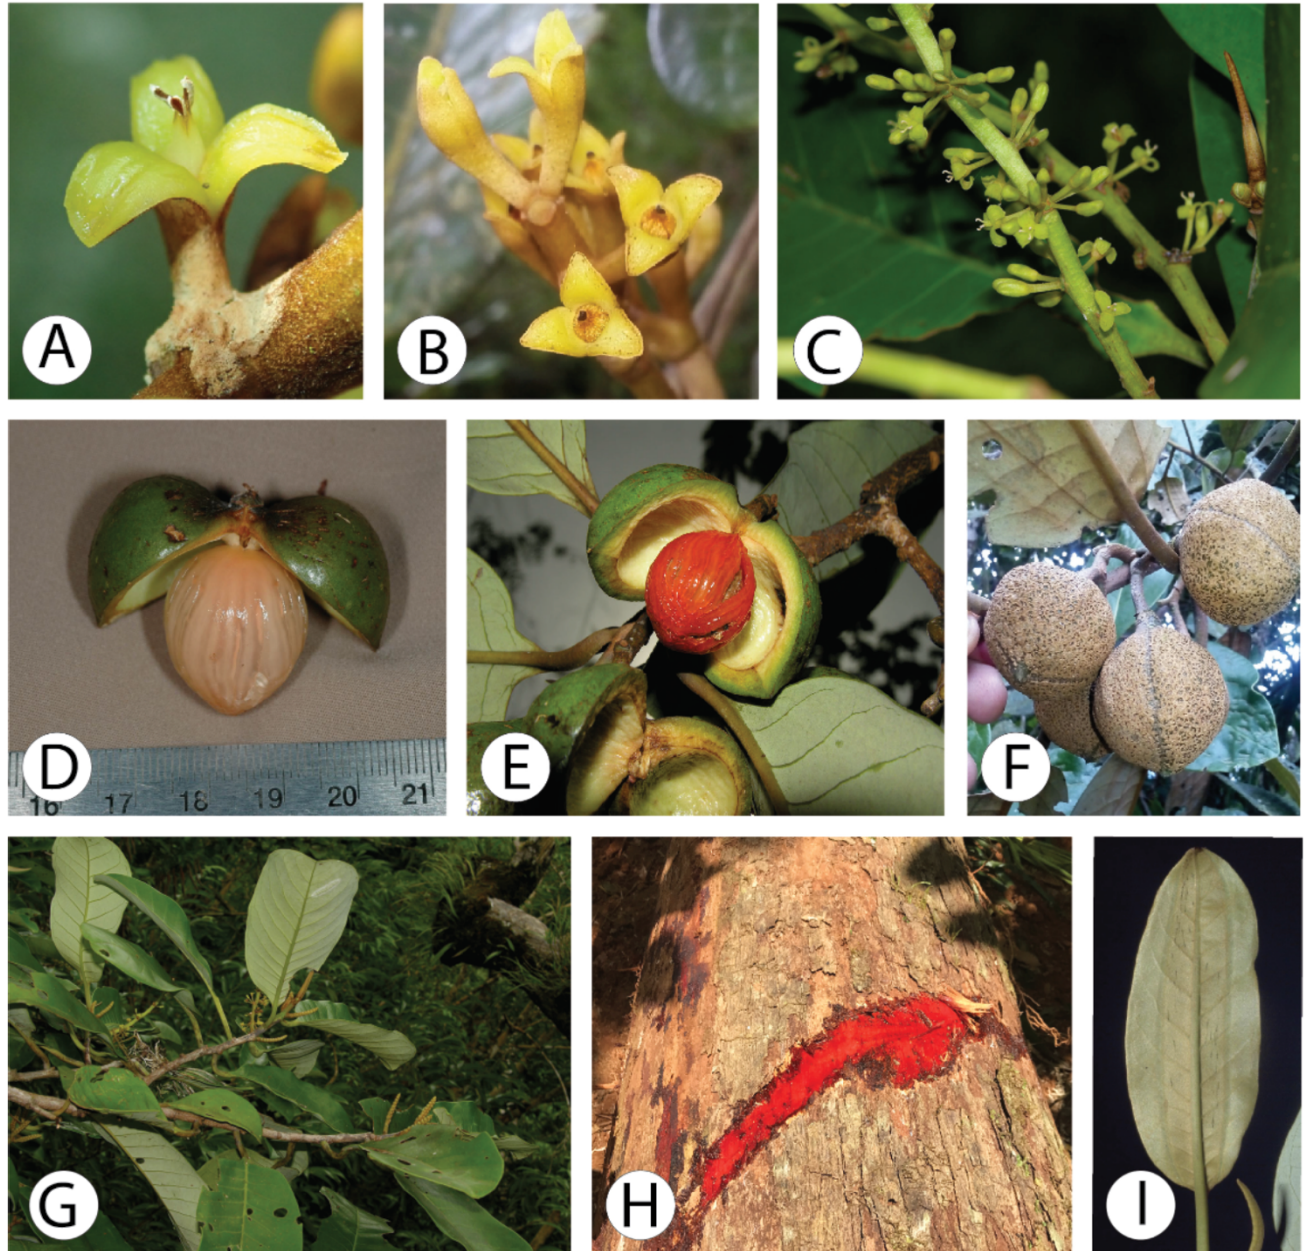

**Figure 1.** Morphological diversity of *Otoa*. A-C) Floral diversity. A) Staminate and B) pistillate flowers of *O. gordoniifolia*; C) Inflorescence of Central American *O. novogranatensis*. D-F) Fruit diversity. D) Fruit from South American *O. novogranatensis* showing whitish aril and E) from Central American *O. novogranatensis* showing red aril. F) Unopened capsules of *O. gordoniifolia*. G-I) Vegetative diversity. G) Branch and H) stem cut of Central American *O. novogranatensis*, the latter showing characteristic red exudate. I) Leaf of *O. parvifolia*, showing veneration lines. (Photo credits: A, B, and F by Rudy Gelis, downloaded from iNaturalist with permission; C, E, G, and H by Reinaldo Aguilar; D by Timothy Paine; and I by John Janovec.)

112

113

114 seed (Fig. 1D-E). However, *Otoba* can be distinguished from these genera by a variety of traits.  
115 Within Neotropical Myristicaceae, *Otoba* is notable for its low-montane distribution (vs. the more  
116 common lowland rainforest) and seeds that most commonly have white arils (vs. typically  
117 brightly colored, as in mace). It has bifacial pollen with continuous tectum on the distal pole and  
118 reticulate tectum on the proximal pole (Sauquet and Le Thomas, 2003), a unique set of  
119 characters within Myristicaceae that is more similar to African members of the family than other  
120 Neotropical genera. It is also the only genus of Neotropical Myristicaceae with conduplicate  
121 vernation (Fig. 1).

122         These differences are perhaps not surprising given its relatively distant relationship to  
123 other Neotropical Myristicaceae. Myristicaceae is sister to the rest of Magnoliales (Qiu et al.,  
124 2006; Soltis et al., 2007; Massoni et al., 2014), a magnoliid clade that represents one of the  
125 oldest angiosperm orders (Magallón et al., 2015). Compared to other families within its order,  
126 Myristicaceae have low levels of genetic diversity. This may be a product of the relatively recent  
127 origin of extant Myristicaceae, compared to other Magnoliales, in the Miocene or late Oligocene  
128 (15–18 My: (Doyle et al., 2004; Massoni et al., 2015). This is corroborated by recent molecular  
129 dating analyses across angiosperms that suggest that the family originated at least 20 My after  
130 the crown-group of Magnoliales at 109 My (Magallón et al., 2015). Despite these young  
131 molecular age estimates, fossil evidence suggests that the family has existed since at least the  
132 early Eocene, though it is possible that *Myristicacarpum chandlerae* represents a stem lineage  
133 (Doyle et al., 2008). Within the family, Myristicaceae is split into three major clades: the  
134 Malouchoids, Pycnathoids, and Myristicoids (Doyle et al., 2004). While most Neotropical  
135 members of this family are included in the Myristicoids, *Otoba* is nested within the otherwise  
136 African Pycnathoids. This, with the relatively young crown age of Myristicaceae, suggests that it  
137 represents the product of long-distance dispersal to the Neotropics from Africa, followed by in-  
138 situ diversification (Sauquet et al., 2003; Doyle et al., 2004).

139         Despite their ecological importance and past work into the phylogeny of Magnoliales and  
140 Myristicaceae, there is no species-level phylogeny of *Otoba* to date. Further complicating this  
141 endeavor, species of *Otoba* are morphologically similar and, as is common for tropical trees,  
142 poorly represented in herbaria, making systematic treatment challenging (Gentry, 1979; Bebbler  
143 et al., 2010). Like many other primarily tropical groups, Myristicaceae has few genomic  
144 resources, with only a single publicly available transcriptome (*Myristica fragrans*; (Carpenter et  
145 al., 2019). Luckily, the recent development of universal probe sets that target loci of  
146 phylogenetic utility across angiosperms, including Angiosperms353, has facilitated the  
147 phylogenomic analysis of such understudied lineages. Further, the molecular technique they

148 rely upon, targeted sequence capture, is robust to the low-quantity, low-quality DNA from  
149 herbarium specimens. This is important, as inclusion of herbarium specimens is often necessary  
150 to achieve robust taxon sampling for clades that grow in regions that are difficult to reach or to  
151 collect in for a variety of reasons, including international collaborations, government permitting,  
152 or regional unrest (Rabeler et al., 2019). While herbarium specimens serve as a valuable  
153 resource to improve taxonomic sampling, DNA from herbarium specimens collected in the wet  
154 tropics have been shown to perform relatively poorly due to preservation issues (Brewer et al.,  
155 2019) posing a challenge to robust genetic sampling. We take advantage of the universal nature  
156 of the Angiosperm353 probeset to infer the first phylogenetic hypotheses for *Otoba*. This is also  
157 the first phylogenomic study that relies exclusive on DNA extracted from herbarium specimens  
158 collected in the wet tropics. Using this phylogenetic framework, we discuss implications for  
159 biogeography and trait evolution of *Otoba*.

160

## 161 MATERIALS AND METHODS

### 162 ***Taxon Sampling***

163 Twenty accessions of *Otoba* representing nine (*O. acuminata*, *O. cyclobasis*, *O. glycycarpa*, *O.*  
164 *gordoniiifolia*, *O. gracilipes*, *O. latialata*, *O. novogranatensis*, *O. parvifolia*, and *O. vespertilio*) of  
165 the ten accepted species and two undescribed species (*Otoba* sp. nov.) were sampled. All  
166 accessions came from herbarium specimens; voucher information may be found in Appendix S1  
167 (see the Supplemental Data with this article). Herbarium acronyms follow Index Herbariorum  
168 (Thiers, constantly updated: <http://sweetgum.nybg.org/science/ih/>). To serve as outgroups, data  
169 from the following transcriptomes available on 1KP project (Carpenter et al., 2019; One  
170 Thousand Plant Transcriptomes Initiative, 2019); <<https://db.cngb.org/onekp/>>) were gathered  
171 for Myristicaceae (*Myristica fragrans*), the broader Magnoniales (*Magnolia maudiae*, *Annona*  
172 *muricata*), and Laurales (*Cassytha filiformis*, *Sassafras albidum*, and *Persea borbonia*).

173

### 174 ***DNA extraction, library prep, target enrichment, and sequencing***

175 Dried leaf tissue was weighed to obtain 500 mg, and tissue was homogenized using an MP  
176 Biomedicals FastPrep-24TM 5G Instrument. DNA extraction followed a modified sorbitol  
177 extraction protocol (Štorchová et al., 2000). Double-stranded DNA concentration was quantified  
178 using an Invitrogen Qubit 4 Fluorometer, and fragment size was assessed on a 1% agarose gel.  
179 For samples with a high concentration of large fragments (>800 bp), the DNA was sheared  
180 using a Bioruptor Pico (Diagenode Inc., Denville, New Jersey, United States) to obtain an  
181 average fragment size of ~ 500 bp. Library preparation was carried out using KAPA Hyper Prep



182 and KAPA HiFi HS Library Amplification kits (F. Hoffmann-La Roche AG, Basel, Switzerland)  
183 and with iTru i5 and i7 dual-indexing primers (BadDNA, University of Georgia, Athens, Georgia,  
184 United States). Library preparation with KAPA Hyper Prep followed the manufacturer's protocol  
185 (KR0961 – v8.20), except for the following modifications: reaction volumes were halved (25  $\mu$ L  
186 starting reaction, instead of 50  $\mu$ L), and bead-based clean-ups were performed at 3X volume  
187 rather than 1X volume to preserve more small fragments from degraded samples. Library  
188 amplification reactions were performed at 50  $\mu$ L. Target enrichment was carried out using the  
189 MyBaits Angiosperms353 universal probe set (Däicel Arbor Biosciences, Ann Arbor, MI;  
190 (Johnson et al., 2019)). Target enrichment followed the modifications to the manufacturer's  
191 protocol outlined in (Hale et al., 2020); i.e., pool of 20-24 samples and RNA baits diluted to 1/4  
192 concentration). Unenriched DNA library was added to the cleaned, target enriched pool to  
193 increase the amount of off-target, chloroplast fragments in the sequencing library. DNA libraries  
194 were sent to Novogene Corporation Inc., (Sacramento, California, United States) for  
195 sequencing on an Illumina HiSeq 3000 platform with 150 bp paired-end reads.

196

### 197 ***Sequence processing, assembly, and alignment***

198 Raw sequence reads were demultiplexed by Novogene Corporation Inc., (Sacramento,  
199 California, United States). Adapter sequence removal and read trimming were performed using  
200 illumiprocessor v2.0.9 (Faircloth et al., 2012; Faircloth, 2016), a wrapper for trimmomatic v0.39  
201 (Bolger et al., 2014). The default settings were used and reads with a minimum length of 40 bp  
202 kept.

203 HybPiper v. 1.3.1 (Johnson et al., 2016) was used to assemble and extract target  
204 regions. Read mapping, contig assembly and coding sequence extraction were performed  
205 running the reads\_first.py script. The intronrate.py script was run to extract introns and  
206 intergenic sequences flanking targeted exons. The retrieve\_sequences.py script was run first  
207 with the "dna" argument to extract coding regions and subsequently with the "supercontig"  
208 argument to extract both coding and non-coding regions as a single concatenated sequence for  
209 each target gene. Individual genes were aligned using MAFFT v. 7.310 (Kato and Standley,  
210 2013). Alignments were visually inspected in AliView v. 1.18.1 (Larsson, 2014) to identify  
211 alignment errors, assembly errors, and areas that were difficult to align. Alignment errors were  
212 manually corrected and assembly errors, as well as areas that were difficult to align, were  
213 removed from individual alignments. Outgroup sequences were added to cleaned alignments  
214 and aligned using MUSCLE v.3.8.31 (Edgar, 2004) as the default aligner program in AliView



215 (Larsson, 2014). Summary statistics on gene alignments were obtained using AMAS (Borowiec,  
216 2016), including length, missing data, and number of parsimony informative sites.

217 Off-target chloroplast reads were extracted using FastPlast v1.2.6  
218 (<https://zenodo.org/record/973887>). For all samples there was insufficient data to produce a  
219 fully-assembled chloroplast genome. The SPAdes-assembler built into FastPlast iteratively used  
220 k-mer lengths of 55, 87, and 121. Assembled contigs from the iteration using k-mer length 87  
221 were mapped to a reference plastome obtained from GenBank (Clark et al., 2016): *Horsfieldia*  
222 *pandurifolia* (GenBank accession number NC\_042225.1). Once mapped, contigs were cleaned  
223 by eye to remove assembly errors before generating a consensus sequence. Consensus  
224 sequences for each sample were aligned visually against the *Horsfieldia* plastome, as alignment  
225 algorithms performed poorly with the large amounts of missing data over long sequences.  
226 Plastomes for *Annona muricata* (MT742546.1), *Cassytha filiformis* (MF592986.1), *Magnolia*  
227 *maudiae* (MN990580.1), and an unverified plastome for *Myristica yunnanensis* (MK285565.1)  
228 were added as additional outgroups.

229

### 230 ***Assessing the impact of specimen age and climate on capture success***

231 The collection year of each voucher specimen was recorded and the annual precipitation (mm)  
232 at the collection locality extracted from the WorldClim 2.0 30s Bioclimatic variable layer (Fick  
233 and Hijmans, 2017) using R package raster (Hijmans et al., 2015). Linear regressions were  
234 performed for collection year and annual precipitation number versus number of target loci  
235 recovered and average sequence length recovered for each sample to determine if the age of  
236 specimen and/or the amount rainfall at the collection locality affected the success of target  
237 sequence capture. The relationship between age, precipitation, and the number of ungapped  
238 basepairs in cleaned chloroplast sequences was also examined to assess the effect of these  
239 factors on off-target sequence capture.

240

### 241 ***Phylogenetic analyses***

242 *Gene tree reconstruction*- Maximum likelihood (ML) estimation of gene trees was performed for  
243 each nuclear locus, a dataset with all nuclear loci combined, the chloroplast genome, and a  
244 dataset with chloroplast and nuclear data combined. Alignments were processed with trimAl  
245 (Capella-Gutiérrez and Silla-Martínez, 2009) assigning a gap threshold of 15% or 20% to each  
246 column, depending on the number of taxa in the alignment. Thresholds were chosen to maintain  
247 columns with data for four or more individuals. Alignments were analyzed using RAxML v8.2.12  
248 (Stamatakis, 2014) under the GTR model with optimization of substitution rates and site-specific

249 evolutionary rates. For combined datasets and the chloroplast, analyses were first run with all  
250 individuals and the program RogueNaRok v.1.0 (Aberer et al., 2011) was used to identify  
251 individuals that negatively impacted phylogenetic inference. Individuals identified by  
252 RogueNaRok and or those with little data (total bp <1% of aligned length) were excluded from  
253 further analyses.

254

255 *Multispecies Coalescent* - Trees were generated under the multispecies coalescent model in  
256 ASTRAL-III (Zhang et al., 2018). Twenty random bootstrap trees were selected from each gene  
257 tree analysis of the Angiosperm353 loci, and used as the input for ASTRAL.

258

### 259 ***Divergence time estimation***

260 Divergence times were estimated on the ML chloroplast-nuclear combined tree using penalized  
261 likelihood via the *chronos()* function in the R package *ape* (Paradis and Schliep, 2019). Crown  
262 ages from the literature (Magallón et al., 2015; Massoni et al., 2015) for Laurales + Magnoliales,  
263 Laurales, Magnoliales, and Myristicaceae were applied as secondary calibrations (Table 2).  
264 Because (Massoni et al., 2015) presented five different calibration schemes, and therefore five  
265 sets of dates for each node, we calculated the mean age for our calibrations as the average of  
266 their mean ages estimated by BEAST across the different schemes. The minimum and  
267 maximum for each node were selected as the youngest and oldest date, respectively, in the  
268 95% confidence interval of any scheme across the different analyses. To estimate the error  
269 surrounding dates at uncalibrated nodes, like the crown age of *Otoba*, the median/mean,  
270 minimum and maximum value from each study was applied as an absolute age at the  
271 corresponding nodes.

272

### 273 ***Ancestral State Reconstruction***

274 Ancestral character estimation was performed using the morphological characters  
275 scored in a recently published taxonomic revision of *Otoba* (Jaramillo-Vivanco and Balslev,  
276 2020), including 10 discrete characters and 18 continuous characters. Character states were  
277 applied to the ML chloroplast and nuclear combined topology calibrated to maximum ages in  
278 (Magallón et al., 2015) and trimmed to include one representative of each species. *Otoba*  
279 *vespertilio* was not included in ancestral state reconstructions due to the uncertainty  
280 surrounding its phylogenetic placement.

281 Because *Otoba* is small genus, and our phylogeny included 8 species, the following  
282 discrete characters were simplified from (Jaramillo-Vivanco and Balslev, 2020) to reduce the

283 number of possible characters states: petiole wingedness; pubescence on the underside of  
284 leaves; anther shape and attachment; aril color. The degree to which the petiole is winged was  
285 simplified from four categories (“obscurely”, “somewhat”, “winged”, and “not winged”; (Jaramillo-  
286 Vivanco and Balslev, 2020) to three (obscurely to somewhat winged, winged, and not winged).  
287 Pubescence on the underside of leaves was similarly simplified from “pubescent”, “glabrescent”,  
288 “somewhat pubescent”, and “densely pubescent” (Jaramillo-Vivanco and Balslev, 2020) to just  
289 two character states: glabrescent to somewhat pubescent and pubescent to densely pubescent;  
290 *O. novogranatensis* ranges from glabrescent to densely pubescent and was thus coded as  
291 occupying both states. Anther shape and attachment did not vary (i.e, anthers were either  
292 globose and dorsally attached or reniform and basally attached, but never reniform and dorsally  
293 attached or globose and basally attached), so they were combined into a single character. Aril  
294 color was altered to have one state representing pale arils (“white”, “white-yellow”, and “yellow”)  
295 and one representing darker arils (“orange-reddish” and “red”). Aril laciniation was excluded from  
296 this study as information is only available for *O. acuminata*, *O. lehmannii*, and *O. vespertilio*. For  
297 continuous characters, the midpoint was taken for measurements given as a range in  
298 (Jaramillo-Vivanco and Balslev, 2020) and two-dimensional traits (e.g., ovary size [length x  
299 width (mm)] and seed size [length x width (mm)]) were separated into two traits (e.g., ovary  
300 length and ovary width).

301 Since *O. novogranatensis* was recovered as polyphyletic, the state for the broadly  
302 described *O. novogranatensis* was applied to both *O. novogranatensis* populations in our tree,  
303 with the exception of aril color, which we know differs across inferred lineages (see  
304 (Santamaría-Aguilar, Jiménez, et al., 2019). Ancestral characters were estimated using the R  
305 package phytools (Revell, 2012); the ace() and the fastAnc() functions were used for discrete  
306 and continuous traits, respectively.

307

### 308 **Biogeographic inference**

309 We modeled biogeographic movements using BioGeoBEARS (Matzke, 2013, 2014;  
310 Massana et al., 2015) implemented in RASP v.4.0 (Yu et al., 2015). The same time-calibrated,  
311 trimmed topology used in ancestral state reconstructions was used for biogeographic  
312 reconstructions. To better understand how major geologic events, like the closure of the Isthmus  
313 of Panama and Andean orogeny, correlate with biogeographic events in the evolutionary history  
314 of Otoba, movement both between continents, as well as distribution on either side of the Andes  
315 were modeled. Each species was coded for occurrence in (A) Central America, (B) South  
316 America, or (AB) both. Species were also coded for their distribution on (A) the western side of

317 Andes, including the Darién gap and Central America or (B) the eastern side of the Andes and  
318 western Amazonia. Six biogeographic models were tested with BioGeoBEARS (Matzke, 2013,  
319 2014; Massana et al., 2015); the DIVA-like model was selected for reconstruction of continental  
320 movements and the BAYArea-like model with jump dispersal was selected for reconstruction of  
321 distribution around the Andes. A maximum of two ancestral areas was allowed for both  
322 analyses.

323

## 324 RESULTS

325 **Summary statistics of data assembly**— The number of Angiosperm353 loci captured,  
326 average sequence length, number of ungapped basepairs of chloroplast DNA (cpDNA) for each  
327 sample, collection year, and annual precipitation at the collection locality are listed in Table 1. A  
328 heatmap of the percent of the reference protein length recovered for each sample at each locus  
329 can be found in Appendix S2 and summary statistics for each locus in Appendix S3.

330

331 **Capture success from herbarium specimens**—We found variable success from hybrid enriched  
332 target sequence capture across samples. Half of the 20 samples submitted for sequencing  
333 recovered fewer than 10 Angiosperm353 loci; only 3 samples recovered more than 100 loci  
334 (Table 1). Success in gathering off-target chloroplast data did not necessarily correspond to  
335 success in capturing nuclear loci. For example, the sample with the most nuclear data— *O.*  
336 *novogranatensis*\_WS36336 with 217 of the 353 targeted loci— did not recover useful chloroplast  
337 data. On the other hand, nearly half of the chloroplast genome was obtained for *O.*  
338 *parvifolia*\_MS1182, despite recovering only 6 nuclear loci.

339 Specimens used for DNA extraction were collected between 1983 and 2015, and annual  
340 precipitation ranged from 1449 mm/year to 3870 mm/year (Table 1). There was a positive  
341 correlation with collection year and both the number of loci recovered and the average  
342 sequence length recovered—more recently collected specimens tended to recover longer  
343 sequences for more loci—though only the correlation between age and average sequence length  
344 was significant (Fig. 2). *Otoba novogranatensis*\_LG20482 was an outlier; despite being the  
345 oldest specimen, this sample performed well in both target sequence capture and off-target  
346 capture of the chloroplast (Table 1; Figure 2). Annual precipitation was negatively, but not  
347 significantly, correlated with the number of loci, average sequence length. Higher rainfall in the  
348 collection locality reduced the performance of extracted DNA with target sequence capture.  
349 There was very little correlation between age or rainfall and off-target capture success (Fig. 2);  
350 the outlying sample *Otoba novogranatensis*\_LG20482 did influence results. Without this

351



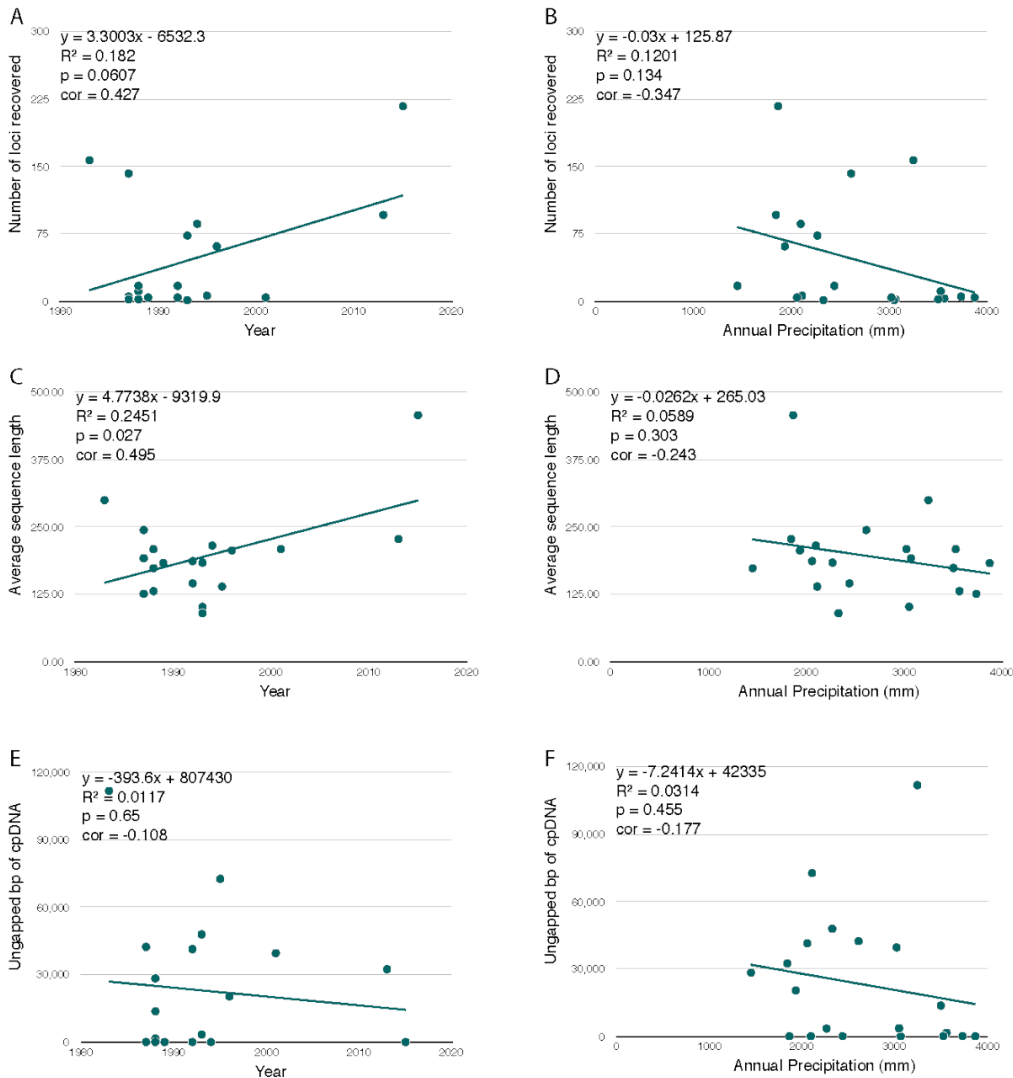

**Figure 2.** Linear regressions for (A) collection year and (B) annual precipitation versus number of loci recovered; (C) collection year and (D) annual precipitation versus average sequence length; (E) collection year and (F) annual precipitation versus number of ungapped basepairs (bp) of chloroplast DNA (cpDNA) recovered from the 20 samples of *Otoba*. The equation, R squared value, and p value ( $\Pr(>|t|)$ ) for the linear regression as well as correlation of the two variables are shown in the top left corner of each graph.

352

353

354

sample, the weak negative correlation between collection year and off-target capture success became weakly positive and remained insignificant ( $cor=0.136$ ,  $p=0.578$ ). Meanwhile,

355

the weak negative correlation between annual precipitation and off-target capture success

356

became more negative, but remained insignificant ( $cor=-0.431$ ,  $p=0.065$ ).

357

358

Due to large amounts of missing data in both nuclear and chloroplast regions, the

359

following samples were excluded from all analyses: *O. gracilipes*\_DC884, *O.*

360

*novogranatensis*\_EB500, *O. parvifolia*\_DN9151, *O. sp. nov.*\_RC5752, *O. sp. nov.*\_JP16902.

361 *Otoba vespertilio*, a recently described species from the Caribbean coast of Costa Rica and  
362 Panama (Santamaría-Aguilar, Jiménez, et al., 2019), was included in some analyses, despite  
363 large amounts of missing data, in an effort to place the species in the phylogeny (Figs. 3 and 4;  
364 Appendices S4-S6). Maximum likelihood analyses were run with and without this species (Figs.  
365 3 and 4; Appendices S4-S6). Overall, we were able to include 8 of the 10 described species of  
366 *Otoba* in phylogenetic analyses and 7 in comparative analyses.

367

### 368 **Phylogenetic analyses**

369 We found strong support for the monophyly of *Otoba* within Myristicaceae, albeit with limited  
370 outgroup sampling within the family (nuclear ML: 100, nuclear MSC: 1, chloroplast: 78, cp and  
371 nuclear combined ML: 100). Though the exact relationship between species varies across our  
372 individual analyses, we have strong support for three major clades of *Otoba* (Figs. 3 and 4). The  
373 first includes *O. acuminata*, *O. cyclobasis*, *O. gordoniiifolia*, *O. latialata*, and *O. novogranatensis*  
374 specimens collected in Central America (nuclear ML: 94, nuclear MSC: 0.9, chloroplast: n/a, cp  
375 and nuclear combined ML: 100). The second includes *O. parvifolia* and *O. glycyarpa* (nuclear  
376 ML: n/a, nuclear MSC: 1, chloroplast: n/a, cp and nuclear combined ML: 75). The third includes  
377 individuals of *O. novogranatensis* collected in South America (nuclear ML: n/a, nuclear MSC:  
378 n/a, chloroplast: 63, cp and nuclear combined ML: 88).

379 Maximum likelihood analyses of concatenated nuclear loci recovered a poorly-supported  
380 grade of *O. glycyarpa* and *O. parvifolia* successively sister to a well-supported clade including  
381 *O. cyclobasis*, *O. latialata*, *O. gordoniiifolia*, and *O. novogranatensis* (Fig. 3A). With *O. vespertilio*  
382 included, the widespread species *O. parvifolia* is paraphyletic with respect to *O. vespertilio*.  
383 Samples for another widespread species, *O. novogranatensis*, are monophyletic, but the  
384 nuclear dataset only included individuals from Central America. The ASTRAL-III tree also found  
385 a clade with *O. cyclobasis*, *O. latialata*, *O. gordoniiifolia*, and *O. novogranatensis* with high  
386 support as well as a strongly-supported clade of *O. glycyarpa*, *O. parvifolia*, and *O. vespertilio*  
387 (Fig. 1B). *Otoba parvifolia* remains non-monophyletic in the ASTRAL-III results; however,  
388 relationships within the clade are poorly supported (Fig. 3B).

389

390

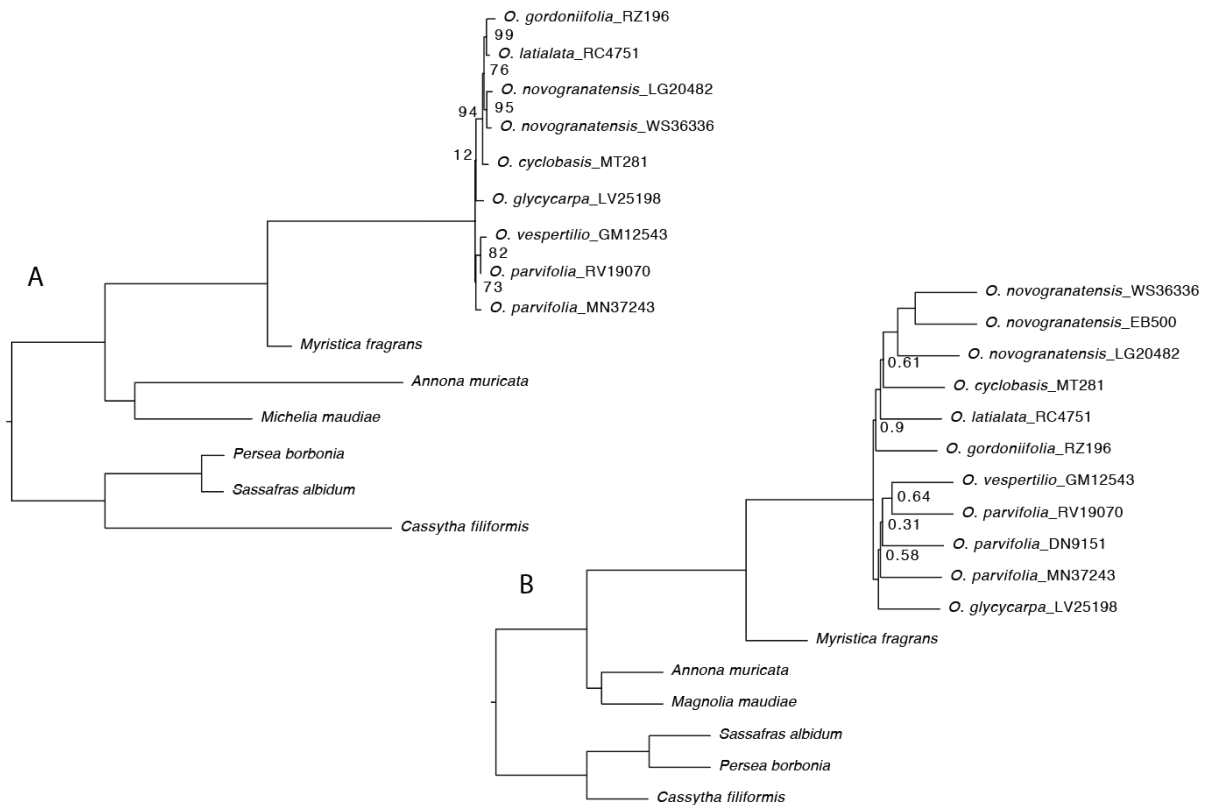

**Figure 3.** Results of phylogenetic analyses with nuclear data; (A) ML analysis of concatenated loci using RAxML and (B) multispecies coalescent analysis of 20 random bootstrap trees from each gene tree analysis using ASTRAL. Support values are listed at nodes for those with <100 bootstrap support and <1.0 local posterior probability for the RAxML and the ASTRAL tree, respectively.

391  
392

393 The topology of the ML chloroplast tree did not agree with either of the nuclear  
394 topologies; however, relationships in the chloroplast tree are, overall, poorly supported  
395 (Appendix S5). The strongly-supported nodes in the ingroup included *Otoba* as a clade  
396 (bootstrap support=78) and the sister pair *O. acuminata* and *O. novogranatensis* (CA, sample  
397 LG20482; bootstrap support=85). Albeit with weak support along the backbone, the South  
398 American samples of *O. novogranatensis* are inferred to be sister to the rest of the genus. The  
399 clade of South American *O. novogranatensis* samples is resolved as sister to the rest of the  
400 genus in the combined chloroplast and nuclear analyses (bootstrap support=88; Fig. 4). The  
401 topology for the remainder of *Otoba* from the chloroplast and nuclear combined dataset is  
402 congruent with analyses of nuclear data (Figs. 3 and 4). The clade including *O. cyclobasis*, *O.*  
403 *latialata*, *O. gordoniifolia*, and the Central American *O. novogranatensis* is again found with high  
404 support; a well-supported clade including *O. glycyarpa*, *O. parvifolia* is also recovered (Fig. 4).

405 However, when *O. vespertilio* was included in the combined dataset, *O. vespertilio* nests within  
406 the South American *O. novogranatensis* rather than *O. parvifolia* (Appendix S5).

407 *Otoba lehmannii* was not sampled in this study and we did not recover sufficient data to  
408 include *O. gracilipes* in our phylogenetic analyses. Based on the geographical structure of  
409 clades within *Otoba*, these species likely either belong to the larger western Andean/Central  
410 American clade or in the South American *O. novogranatensis* clade.

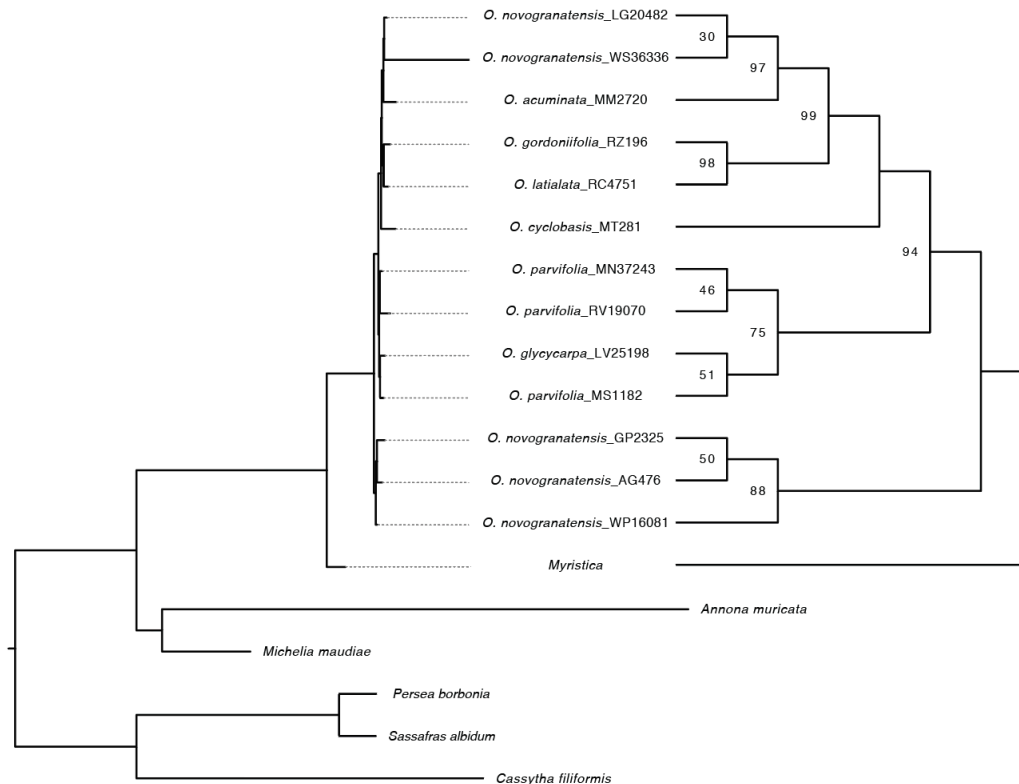

**Figure 4.** Results of ML analyses of concatenated chloroplast and nuclear data. The tree on the right shows branch lengths; the cladogram on the left shows the branching pattern for the ingroup + *Myristica* and support values at nodes with <100 bootstrap support (all outgroup relationships were fully supported).

411

412

### 413 **Divergence Time Estimation**

414 Divergence times estimated from different calibrations across studies (Magallón et al., 2015;  
415 Massoni et al., 2015) were largely congruent (Table 2; Appendices S7-S12). The mean  
416 estimated ages based on (Massoni et al., 2015) were older than those based on (Magallón et  
417 al., 2015) and had a broader estimated minimum and maximum range. This is expected as  
418 (Massoni et al., 2015) estimated ages under five different timelines for the crown radiation of



419 angiosperms: 130 Ma, 140 Ma, 150 Ma, 170 Ma, and 200 Ma. The estimated age of  
420 angiosperms from (Magallón et al., 2015) was 139.4 Ma. All estimates support the radiation of  
421 *Otoba* in the late Miocene (Fig. 6). The crown age for *Otoba* based on calibrations from  
422 Magallón et al. (2015) is estimated to be 7.28 Ma (7.04-7.51 Ma); whereas dates based on  
423 (Massoni et al., 2015) are 8.69 Ma (6.5 -11.36 Ma). The divergence between the western  
424 Andean/Central American clade and the eastern Andean/Amazonian clade is inferred to have  
425 occurred around 6.54 Ma (6.32-6.75 Ma) and 7.67 Ma (5.98-9.83 Ma) based on (Magallón et al.,  
426 2015) and (Massoni et al., 2015), respectively.

427

### 428 **Ancestral State Reconstruction**

429 Many of the discrete characters exhibited frequent transitions between states along the tree  
430 (Figure 5; Appendices S13-S22). These frequent shifts in character state among closely-related  
431 individuals, combined with short divergence times along the backbone of the tree, produced  
432 near-equivocal reconstructions of character states at ancestral nodes (Appendices S9-S18).  
433 Similarly, closely-related species exhibited marked differences in continuous traits (Figure 5;  
434 Appendices S23-S40). All estimations of continuous characters resulted in a value at the root  
435 close to the average of the observed states in the genus (Appendices S19 - S36).

436 Traits with a resolved evolutionary history include: the presence of secondary to tertiary  
437 intramarginal veins, the shape and fusion of filaments, the presence of extrastaminal discs, the  
438 presence of prickles at the apex of the seed, and aril color (Appendices S10, S11, S12, S17,  
439 and S18). Within the more-resolved character histories, multiple derivations of traits are inferred.  
440 The presence of secondary to tertiary intramarginal veins emerged at least three times; they are  
441 present in *O. gordonifolia*, populations of *O. novogranatensis*, and *O. lehmannii* (not sampled).  
442 Fused, bottle-shaped filament columns are the most common state in *Otoba*. Filament shape  
443 transitioned from the tapered bottle shape to cylindrical in *O. cyclobasis*. Fusion of filaments  
444 was lost multiple times in populations of *O. novogranatensis*. Extrastaminal discs evolved twice:  
445 once in *O. acuminata* and once in *O. cyclobasis*. Prickles at the apex of the seed were partially  
446 lost in *O. cyclobasis* and *O. parvifolia* and lost completely in *O. glycycarpa*; *Otoba vespertilio*  
447 (not included in ancestral reconstructions) also displays a reduction in seed prickles. Finally,  
448 arils are ancestrally pale (white to yellow) in *Otoba*; red arils have evolved at least once in  
449 Central American *O. novogranatensis*. One additional species not included in ancestral  
450 reconstructions, *O. gracilipes*, also has red arils.

451

452

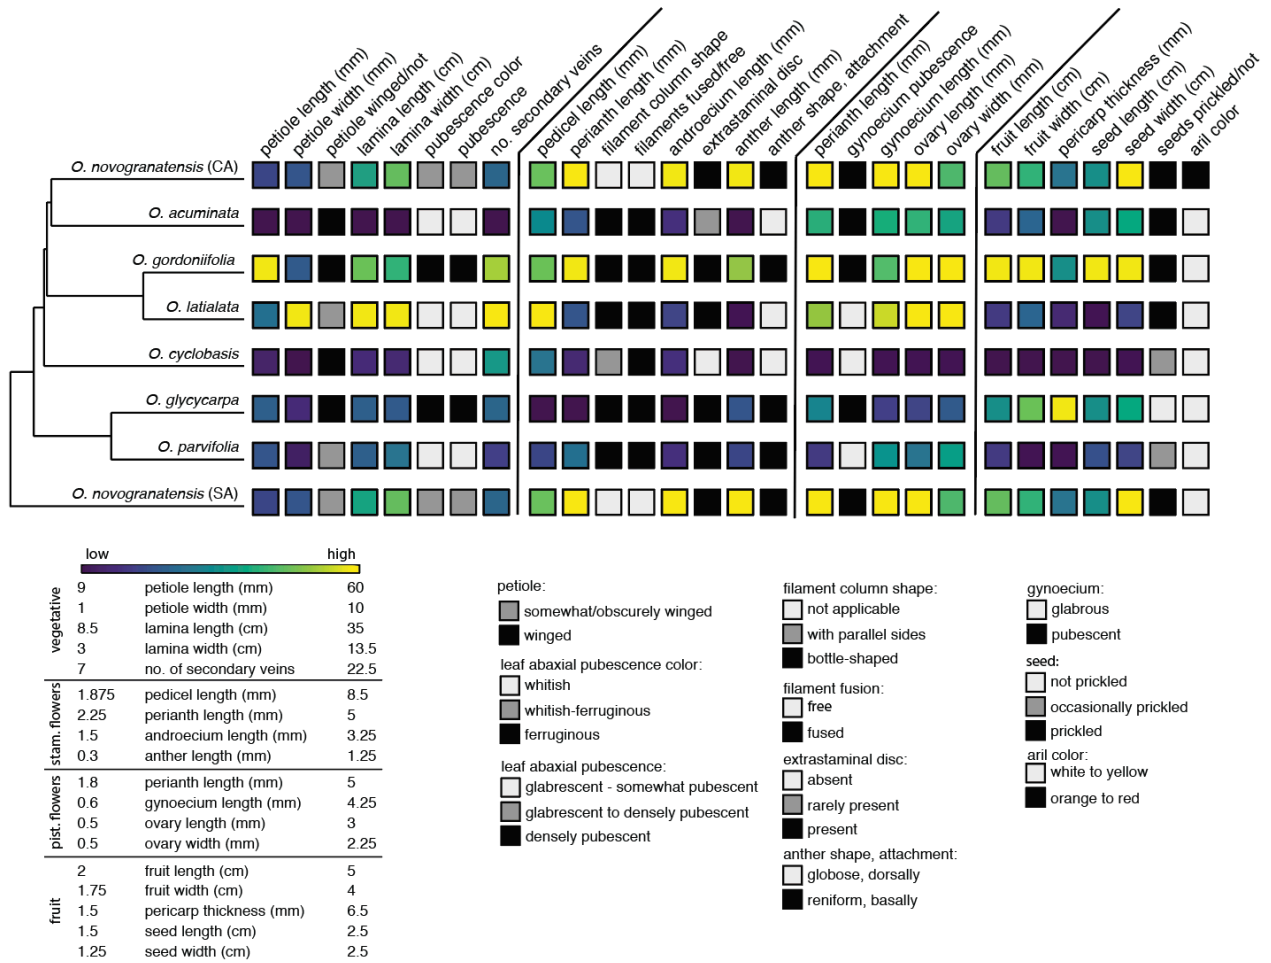

**Figure 5.** Summary of tip states from ancestral character reconstruction for species included in the phylogeny. Traits are sectioned into vegetative, staminate floral, pistillate floral, and fruit traits. Discrete traits are color-coded in grayscale with the scoring system for each trait described below. Continuous characters are coded along a colored gradient from low values (dark purple) to high values (yellow). The numerical range for each trait is listed below; color values for each tip were extracted from the output of ancestral character estimations in R (Appendices S9 – S37).

453

454

455

### 456 **Biogeographic Reconstruction**

457 South America and, more specifically, the western side of the Andes is inferred to be the  
 458 ancestral area of *Otoba* (Fig. 6). Jump dispersal to the eastern side and the Amazonian basin  
 459 best explains the divergence of the *O. glycyarpa*-*O. parvifolia* clade (Fig. 6B). In the western-  
 460 Andean clade including *O. acuminata* and *O. cyclobasis*, a South American ancestor is inferred  
 461 with expansion into Central America via widespread ancestors (Fig. 6A).

462

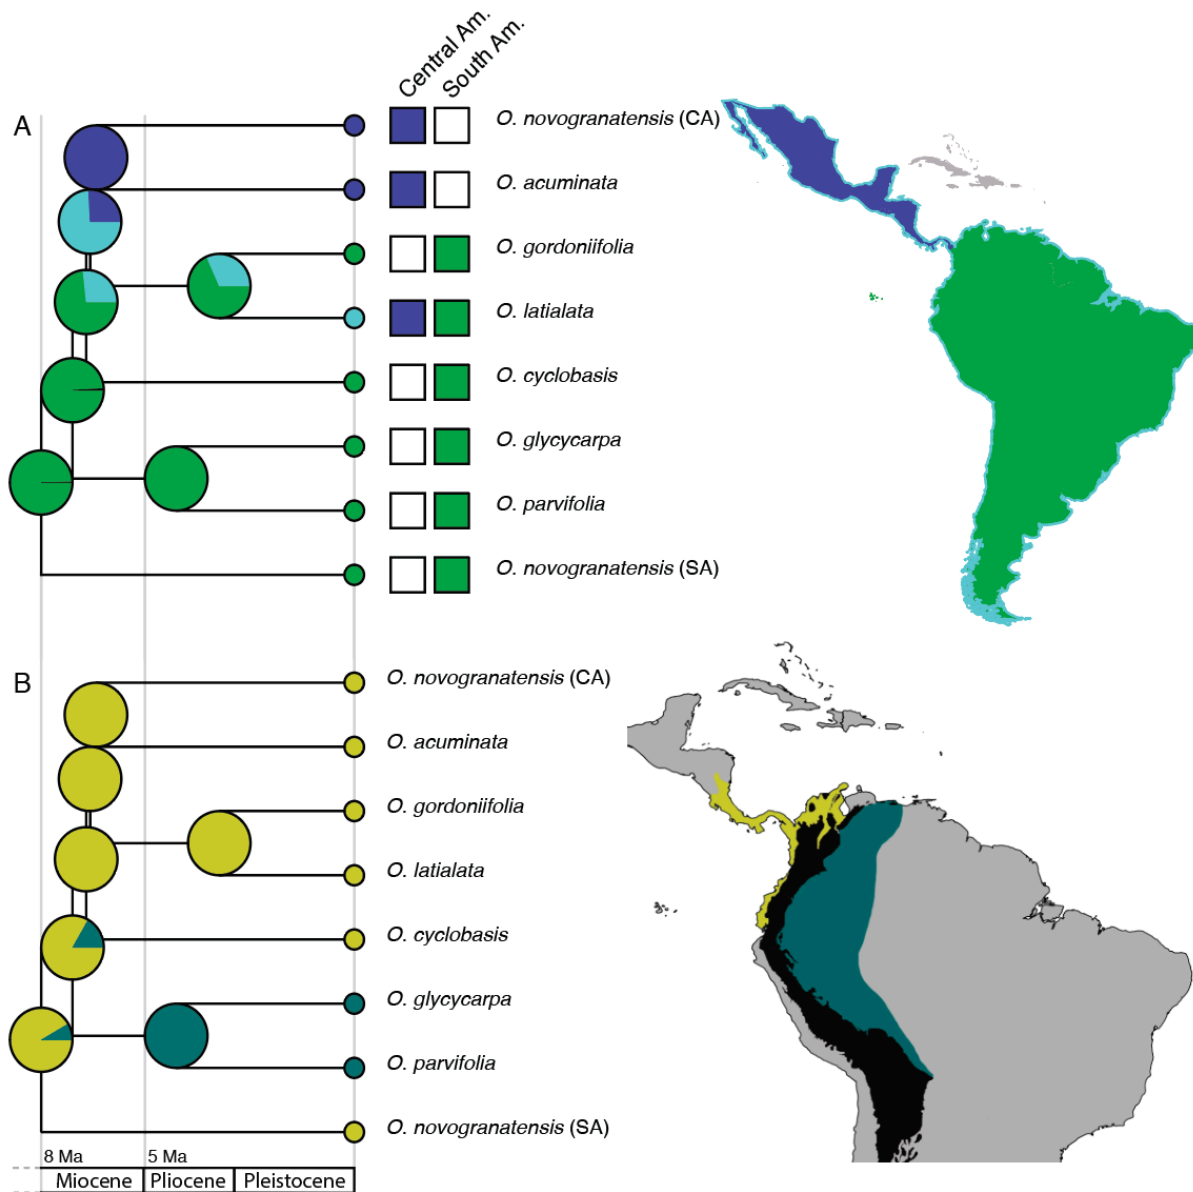

**Figure 6.** Ancestral area reconstructions for (A) Central America versus South America and (B) western Andes and Central America versus eastern Andes and the Amazon. Pie charts at nodes display the probability that the ancestor occupied a given range. Maps to the left of each tree are color coded to correspond with the geographic areas coded on the tree. In (A), green = South America, royal blue = Central America, and light blue = both Central and South America; the distribution of each species in Central and/or South America is additionally reflected in the color-coded boxes at the tips of the tree. In (B), chartreuse = western Andes and Central America, and teal = eastern Andes and the Amazon; the Andes are represented in black.

465

## 466 **DISCUSSION**

467 There were many challenges, both methodological and biological, inherent to our goal of  
468 inferring the first phylogeny of the ecologically dominant Neotropical tree genus *Otoba*. Our use  
469 of a universal probe set meant lower specificity in target capture, and that variation within loci  
470 would potentially be low. Methodological challenges extended to our exclusive use of degraded,  
471 low quantity DNA extracted from herbarium specimens— a challenge exacerbated by *Otoba*'s  
472 distribution in low- to-mid-elevation moist tropical forests, where specimens are particularly  
473 difficult to preserve and dry. Biologically, *Otoba*'s Andean-centered distribution suggests that it  
474 is likely a young clade with a phylogeny characterized by short branch lengths and young  
475 speciation events, a result borne out in our analyses. Despite these significant challenges, we  
476 were able to produce a framework phylogeny for *Otoba*— the first phylogeny for any Neotropical  
477 group of Myristicaceae. Our phylogenetic results consistently included two subclades: 1) an  
478 eastern Andean/Amazonian clade comprising *O. parvifolia* and *O. glycyarpa* and 2) a northern  
479 Andean/Central American clade comprising *O. acuminata*, *O. cyclobasis*, *O. gordoniiifolia*, *O.*  
480 *latialata*, and some individuals of *O. novogranatensis*. The 6-9 Ma divergence of the eastern  
481 Andean/Amazonian clade from the western Andean/Central American clade suggests that long-  
482 distance dispersal across the Andes, rather than vicariance via mountain uplift, produced the  
483 present distribution.

484

### 485 ***Landscape evolution and dispersal limitation drive biogeography in Otoba***

486 The Neotropics have a complex geological history (Hoorn et al., 2010), including the  
487 rapid uplift of the Andes and the closure of the Isthmus of Panama. These events have had  
488 dramatic impacts on the evolution of the taxa that inhabit this region (Hughes et al., 2006;  
489 Antonelli et al., 2009; Bacon et al., 2015). We find compelling evidence that both have played  
490 important roles in the shaping biogeographic history of *Otoba*.

491 *Otoba* is a product of long-distance dispersal from Africa to the Neotropics. It is likely  
492 that the dispersal event that resulted in stem lineage *Otoba* was from western Africa, where the  
493 closest relatives of *Otoba*, *Pycnanthus* and *Ceolocaryon*, occur today, to eastern South America  
494 (Doyle et al., 2004) in the last 19-7.2MA (Table 1). During this time period, range expansion  
495 across the northern Neotropics would have been facilitated by a more-or-less contiguous  
496 swathe of lowland rainforest and a relatively low height of the Andes, including a low elevation  
497 gap in the region that comprises the current border area between Ecuador and Peru (Hoorn et  
498 al., 2010). By the time that crown *Otoba* originated ca. 7.2Ma, we infer that this lineage was



499 restricted to the western side of the Andes; the long, empty stem lineage of *Otoba* is consistent  
500 with high rates of past extinction explaining this pattern. Our ancestral state reconstructions and  
501 divergence time estimates point to a western Andean origin of *Otoba* (Fig. 6) in the late Miocene  
502 to early Pliocene. This is a region of origin shared with relatively few other Neotropical tree  
503 groups, including a clade of Annonaceae (Pirie et al., 2018); more tree clades that have been  
504 investigated have Amazonian origins, including the *Brownea* clade (Fabaceae; (Schley et al.,  
505 2018) and Neotropical Chrysobalanaceae (Chave et al., 2020). Following establishment, *Otoba*  
506 seem to be one of few lineages that experience *in situ* diversification within the Chocó  
507 biogeographic region (Pérez-Escobar et al., 2019).

508         The Andes structure the ranges of species and clades in crown *Otoba*. Species either  
509 occur on the eastern slopes of Andes, extending into the western Amazon basin, or on the  
510 western slopes of the Andes and/or in Central America. The same pattern is observed within  
511 subclades, with closest relatives sharing distribution on one side of the Andes. During the time  
512 that elapsed between the dispersal from Africa and the origin of crown *Otoba*, the northern  
513 Andes gained approximately half their elevation (Garziona et al. 2017) and analogs to modern  
514 montane cloud forests formed (Hughes, 2016; Martínez et al., 2020). Thus, even though they  
515 had not yet reached their full height (Hoorn et al., 2010), the Andes would have represented a  
516 significant barrier to dispersal for low- to mid-elevation groups like *Otoba*. Consistent with this  
517 scenario, we infer only a single dispersal event from the western side of the Andes to the  
518 eastern side; this dispersal occurred in the late Miocene to early Pliocene, resulting in two  
519 widespread, lowland species, *O. glycyarpa* and *O. parvifolia* (Fig. 6). It is unlikely that Andean  
520 uplift served as a vicariant event that split widespread populations; instead, we posit that long-  
521 distance dispersal across the mountains, likely mediated by bird or mammal seed dispersers,  
522 facilitated this disjunct distribution.

523         Movement between Central and South America has occurred more frequently than  
524 movement across the Andes during the evolutionary history of *Otoba*. Range expansion and  
525 long-distance dispersal have both played a role in movement into Central America. A  
526 widespread distribution in South and Central America is inferred for the most recent common  
527 ancestor of *O. acuminata*, *O. novogranatensis* (CA), *O. gordoniiifolia*, and *O. latialata* in the late  
528 Miocene (Fig. 6). The current, widespread distribution of *O. latialata* in the Chocó-Darién moist  
529 forest from Colombia to Panama suggests the common ancestor of the clade may have  
530 occupied a similar distribution. If this is the case, a pattern of subset sympatry—when one  
531 daughter lineage inherits the ancestral range and the other daughter(s) inherit a portion of the  
532 ancestral range (Ree et al., 2005)—is consistent with our inferred biogeographic history. An

533 additional long-distance dispersal event is assumed for *O. vespertilio*. While the phylogenetic  
534 position of *O. vespertilio* differs across our analyses (Fig. 3; Appendix S6), all possible  
535 placements are consistent with it representing a long distance dispersal event from South  
536 America to Central America. These events occurred within the last 10 million years, a time-  
537 frame that supports the role of the closure of the Isthmus of Panama in facilitating these  
538 movements (Montes et al., 2012; Bacon et al., 2013).

539 The observed biogeography patterns are likely explained by dispersal limitation. *Otoba*'s  
540 relatively large seeds are dispersed by birds, primates, and bats (Giraldo et al., 2007; Nuñez-Iturri  
541 and Howe, 2007; Melo et al., 2009; Santamaría-Aguilar, Jiménez, et al., 2019), with a potential  
542 role of small mammals as secondary seed dispersers (Forget et al., 2002). These groups can  
543 often be dispersal limited, including across riverine barriers and fragmented habitats (Eberhard  
544 and Bermingham, 2005; Ripperger et al., 2013; Boubli et al., 2015) (though this is not always  
545 the case; see (Holbrook, 2011). The potential for dispersal limitation is observed within  
546 communities in which the relatively large seeds of *Otoba parvifolia* are dispersed at low  
547 frequency over typically short distances (Terborgh et al., 2011). On a continental scale and over  
548 evolutionary time, this has resulted in relatively few long distance biogeographic movements.  
549 *Otoba*'s two migrations into Central America were potentially facilitated by the continuous land  
550 bridge of more-or-less suitable habitat, while cold high-elevation habitats likely prevented more  
551 frequent traversing of the Andes. Further, the range of *Otoba* does not occupy all of the suitable  
552 habitat it presumably could based on distributions of extant species. *Otoba* does not occur in  
553 other low to mid-elevation moist forest habitats in the Neotropics, like the Atlantic coast forest in  
554 Brazil and the Caribbean islands, a pattern mirroring ecologically similar and closely related  
555 *Virola* (Santamaría-Aguilar, Aguilar, et al., 2019). Again, dispersal limitation may explain *Otoba*'s  
556 absence from these regions: the relatively large seeds of *Otoba* likely make dispersal events  
557 over water barriers or large stretches of unsuitable terrestrial habitat uncommon compared to  
558 groups that are dispersed by wind (Pérez-Escobar et al., 2017) or migratory passerine birds  
559 (Nathan et al., 2008). This is likely coupled to time limitation, given the young age of the genus  
560 and the stochastic nature of long-distance dispersal events (Nathan et al., 2008). However, high  
561 levels of seed-set, both in closed canopy forests and in treefall gaps, may make *Otoba* an  
562 effective colonizer of new habitats once they do arrive in a new region (Myster, 2020).

563

#### 564 ***Dynamic evolution of morphological traits is common***

565 We observe a dynamic pattern of character evolution across a broad suite of traits in  
566 *Otoba*. While frequent transitions between morphological characters often results in unresolved

567 ancestral state reconstructions, mapping tip states reveals that no two species share a set of  
568 discrete traits (Fig. 5). Further, even though ancestral states were equivocal, the majority of the  
569 discrete traits that we investigated underwent convergent evolution within the genus, including:  
570 winged petioles, pubescence presence and color, filament fusion, anther shape and attachment,  
571 and gynoeceum pubescence (Fig. 4). Coupled with short divergence times between speciation  
572 events after the crown age of *Otoba* (Fig. 6; Appendices S7 and S8), the observed variation  
573 across all traits is consistent with rapid morphological evolution coinciding with rapid lineage  
574 divergence upon establishment in South America. This pattern may also be explained by the  
575 sorting of ancestral variation (Pease et al., 2016), and it is likely that hemiplasy or parallel  
576 evolution underlie morphological evolution. Ecological opportunities on a new continent may  
577 have served to differentially select standing ancestral variation, resulting in the repeated  
578 evolution of many traits in *Otoba*.

579 An unconfirmed, but likely case of convergent evolution is aril color. Most species in  
580 Myristicaceae produce red arils that cover seeds to varying degrees. These bright, red arils that  
581 contrast with the green and brown of the capsule and seeds (Fig. 1E) serve as an attractant to  
582 frugivores who consume the nutritious aril, either with or without consuming the seed (Howe and  
583 Vande Kerckhove, 1981; Gautier-Hion et al., 1985). Most species of *Otoba*, however, produce  
584 white to yellow arils (Fig 1F); these pale colors still contrast the seed and capsule and attract  
585 frugivores (Gautier-Hion et al., 1985; Wheelwright and Janson, 1985). Two species have red  
586 arils: *O. gracilipes* and the Central American members of *O. novagranatensis* (supported as a  
587 distinct lineage in our analyses). Our field observations suggest that these differences in aril  
588 color coincide with differences in texture: red arils are generally thick and waxy, while whitish  
589 arils are thin and gelatinous. On a broad phylogenetic scale, this represents convergent  
590 evolution of red arils within Myristicaceae and likely serves as a shared ecological signal with  
591 other Neotropical members of the family, including the widespread *Virola*. Within the genus,  
592 bright red arils have presumably evolved twice independently (Fig. 5), though the exact  
593 phylogenetic placement of these independent origins remains unknown as *O. gracilipes* was not  
594 included in our analyses. We also see convergence in seed size and shape (Fig. 5), additional  
595 traits that are likely related to the mechanics of seed dispersal.

596 Convergence in fruit traits, including seed size and aril color and texture, may be linked  
597 to a specialized dispersal syndromes in *Otoba*. Differences in overall seed morphology  
598 throughout the genus, including size, aril color and texture, potentially represent specialization  
599 with different classes of dispersers. For example, species with bright red arils, including *Virola*  
600 *surinamensis*, are consumed by birds (Howe and Kerckhove, 1980; Howe and Vande

601 Kerckhove, 1981), while species with whitish arils are consumed by bats (Melo et al., 2009;  
602 Santamaría-Aguilar, Jiménez, et al., 2019); while more comparative field studies are needed to  
603 confirm the most effective dispersers across species, these observations are broadly consistent  
604 with global patterns of mammal- and bird-dispersed fruits (Sinnott-Armstrong et al., 2018). While  
605 seed dispersal is not directly tied to reproductive isolation, theoretical models support  
606 mutualisms between animal dispersers and flowering plants coupled with repeated habitat  
607 fragmentation as a mechanism that promotes speciation during range contractions, allowing for  
608 coexistence of diverged populations upon habitat reunification (Kakishima et al., 2015). This is a  
609 likely potential scenario in *Otoba*, given that major mountain-building events were occurring the  
610 northern Andes and, along with them, reorganization of river systems, were occurring during the  
611 late Miocene and early Pliocene, when many of the divergence times between species are  
612 inferred (Hoorn et al., 1995, 2010; Struth et al., 2015). Fluctuating landscapes and fluvial  
613 barriers at the time may have fragmented populations, promoting divergence between those  
614 populations and securing species boundaries upon secondary contact. Supporting this, large  
615 rivers are important barriers to dispersal and gene flow in tropical birds (Hayes and Sewlal,  
616 2004; Burney and Brumfield, 2009; Fernandes et al., 2014; Oliveira et al., 2017; Sandoval-H et  
617 al., 2017); by extension, they should also be significant barriers to the plants that they disperse  
618 as well (Nazareno et al., 2017; Dambros et al., 2020).

619

### 620 ***The need for future phylogeography of widespread species***

621 *Otoba* includes a combination of narrowly endemic and widespread species. We find  
622 strong evidence for polyphyly of one widespread taxon, *O. novogranatensis*, and for paraphyly  
623 of another, *O. parvifolia*. This non-monophyly is likely both a product of biological processes  
624 (e.g., very large population sizes maintained over very large distances in *O. novogranatensis*  
625 (Pennington and Lavin, 2016) and an artifact of insufficient taxonomic study (Lagomarsino and  
626 Frost, 2020).

627 The polyphyletic *Otoba novogranatensis* is one of the most collected species of its  
628 genus. A preliminary revision of the resulting specimens shows variation across many traits. For  
629 example, South American specimens differ from Central American specimens in their thicker  
630 pericarp, pubescent ovaries, anthers that can be unfused to the base (de Candolle, 1856;  
631 Jaramillo et al., 2004; Jaramillo-Vivanco and Balslev, 2020), and generally white arils. Thus, the  
632 two distinct lineages of *O. novogranatensis* that we resolve (Fig. 4), corresponding to South  
633 American and Central American accessions, are supported by morphology. There are additional  
634 differences within Central American *O. novogranatensis* that are likely to be taxonomically

635 informative as well, including the size, shape, and pubescence of leaves, as well as the length  
636 of staminate inflorescences, perianth, and anthers varies across the Pacific (e.g., *R. Aguilar* 638  
637 [INB/CR]) and Caribbean slopes (e.g., *I. Chacón* 1360 [INB/CR]) of Costa Rica; montane  
638 populations within Costa Rica exhibit additional differentiation. Together, these observations  
639 suggest that phylogeographic analysis of *O. novogranatensis* is necessary to adequately  
640 determine the number of lineages that are currently described under this umbrella taxon. This  
641 would facilitate future taxonomic efforts to recircumscribe this species complex to reflect  
642 evolutionary relationships, which will likely entail the description of at least one new Central  
643 American species.

644         Similarly, the paraphyly of *O. parvifolia* is not surprising, but for different reasons. Our  
645 phylogenetic results suggest that *O. glycyarpa* has recently diverged from *O. parvifolia*, and  
646 has since become widespread as well. Our taxon sampling includes multiple accessions of *O.*  
647 *parvifolia* and a single accession of *O. glycyarpa*; these species determinations were based on  
648 differences in pericarp thickness, gynoeceum pubescence, and color of foliar pubescence  
649 (Jaramillo et al., 2000). In all analyses, these accessions are each others' closest relatives,  
650 though *O. parvifolia* is almost always resolved as a grade (Fig. 3, 4; but see Appendix S4 where  
651 it is resolved as a clade). The geographic structure of these species are unresolved across our  
652 analyses; while Bolivian and Peruvian accessions of *O. parvifolia* are often resolved as sister  
653 lineages that are more distantly related from Ecuadoran and Brazilian accessions *O. parvifolia*  
654 and *O. glycyarpa*, there is variation across our analyses and support for these relationships is  
655 often low. A previous study based on limited genetic data has suggested that *O. parvifolia* and  
656 *O. glycyarpa* are genetically indistinguishable, with the implication that they represent a single  
657 species (Honorio Coronado et al., 2019). This low genetic variability between species, which is  
658 consistent with the short branch lengths in our analyses, may be the product of species  
659 misidentification, lack of informative variation in the loci used, introgression, or sorting of  
660 ancestral variation in the short time since speciation (ca. 3.7 Ma). The latter two mechanisms  
661 would not be surprising: our analyses suggest that these species are recently diverged,  
662 overlapping in both geographic occurrence, and have overall similar morphology. While our  
663 sampling did not allow us to test the monophyly of *O. glycyarpa*, morphological evidence  
664 supports the distinctness of these species (Jaramillo et al., 2000). Of particular note, *O.*  
665 *glycyarpa* has one of the thickest pericarps of all *Otoba*, which has implications for potential  
666 efficacy of seed dispersers. We consider *O. parvifolia* to be a distinct species form *O.*  
667 *glycyarpa*, and its paraphyly is indicative of its complex evolutionary history (Freudenstein et  
668 al., 2016). Future ecological and phylogeographic research could target what allows



669 morphologically similar closest-related species to co-occur throughout large swathes of western  
670 Amazonia.

671

672 ***Targeted sequence capture promotes herbariomics— with caveats***

673 Hybrid-enriched target sequence capture with Angiosperms353 has proven useful for  
674 generating phylogenetically informative data at multiple taxonomic scales and from different  
675 sources of DNA (i.e., silica-dried tissue versus herbarium specimens; (Brewer et al., 2019; Shee  
676 et al., 2020; Valderrama et al., 2020). To our knowledge, our study represents a new milestone  
677 for Angiosperms353 phylogenomics: the first exclusively herbariomic dataset for a wet tropical  
678 genus. DNA from herbarium specimens collected in the wet tropics performs poorly compared  
679 extractions from other climates and silica-gel dried tissue (Brewer et al., 2019). This is because  
680 high humidity in moist tropical forests and often remote localities extend drying times and/or  
681 delay access to drying apparatuses. Resultantly, collections are often treated with ethanol to  
682 prevent mold and decay until they can be dried. Both storage of tissues in humid conditions  
683 after collection (Adams, 2011) and preservation in ethanol (Doyle and Dickson, 1987; Pyle and  
684 Adams, 1989) degrades DNA, resulting in damaged and fragmented genetic material (Särkinen,  
685 Staats, et al., 2012). Even though current short-read sequencing techniques perform well with  
686 herbarium specimens as compared to conventional Sanger sequencing (Bakker et al., 2015),  
687 the level of degradation common among wet tropical specimens led (Brewer et al., 2019) to  
688 recommend the use of silica tissue for wet tropical groups. While we agree that this is a best-  
689 practice, as in other herbarium-based studies (Brewer et al., 2019; Shee et al., 2020), we were  
690 able to extract useful phylogenomic data from herbarium specimens using Angiosperms353.

691 Herbarium samples are an increasingly useful source of DNA for phylogenomic studies,  
692 extending the utility of our historic natural history collections (Lendemer et al., 2020), but they  
693 are not a panacea. Even high efficiency target capture will fail when DNA is low quality, as is  
694 typical in herbarium specimens collected in the wet tropics (Brewer et al., 2019), especially  
695 when they are collected in ethanol (Särkinen, Staats, et al., 2012)— a common scenario for  
696 *Otoba*, and likely universal in the herbarium specimens that we sampled. The specimens we  
697 included in our analyses span a breadth of age and environmental conditions at collecting  
698 localities. The oldest specimen that we included was 37 years old, collected in 1983;  
699 surprisingly, it resulted in the most genetic data (Fig. 2). However, not all of our samples  
700 generated useful sequences; we had to remove some of our samples completely due to poor  
701 quality reads and apparent contamination following visual inspection of alignments. In other

702 cases, we were able to extract a handful of useful loci, but at a much lower quality than the  
703 majority of our included species.

704 In agreement with past studies, we found that capture success, as measured by the total  
705 number of loci obtained as well as their average length, decreased with increasing age of the  
706 specimen; we further found a correlation between environmental conditions (i.e., annual  
707 precipitation) at the site of collection and the quality of phylogenomic data (Fig. 2). However, we  
708 were only able to capture more than 10 loci from half of our initial 20 samples, and only three  
709 *Otoba* samples were successful in recovering over 100 loci. This limited capture success is  
710 most likely a product of low input DNA quality and not due to sequence divergence from the  
711 probeset, especially considering that we had similarly variable success in capturing the high-  
712 copy, off-target chloroplast genome. Plastomes from wet tropical specimens have also been  
713 found to have higher fragmentation rates and lower sequencing success as compared to  
714 plastomes from specimens collected in other climates (Bakker et al., 2015; Brewer et al., 2019).  
715 This compounded with a lower depth of sequencing coverage in the off-target chloroplast  
716 regions and resulted in higher sequencing error, which led to conflicting phylogenetic signal and  
717 low support. The chloroplast data were able to complement our Angiosperms353 data and  
718 allowed the inclusion of additional samples in phylogenetic analyses, but stronger, more  
719 consistent signal was recovered in Angiosperm353 target loci.

720 To extend the potential utility of voucher specimens collected in the future for genomic  
721 research, efforts should be made to collect leaf tissue in silica gel or other preservation  
722 technique, following best practices, including unique IDs to connect the herbarium voucher to  
723 this secondary product (Funk et al., 2017). However, many studies of tropical groups rely on  
724 museum specimens, as it is not feasible to collect living material for the taxonomic and/or  
725 geographic breadth of many clades. As this is often the case, we urge botanical collectors to  
726 include information about how voucher specimens were treated (e.g., specifying that specimens  
727 were collected and dried in ethanol). We have demonstrated that even though it may not be  
728 ideal, it is still possible to generate phylogenomic datasets that can resolve rapid radiations of  
729 wet tropical plant clades using the Angiosperms353 probeset.

730

### 731 ***Utility of Angiosperms353 as universal loci for plant phylogenomics, even in rapid*** 732 ***radiations***

733 Despite the fact that the Angiosperms353 loci were designed to be phylogenetically  
734 useful across all angiosperms, we were able to resolve relationships within a clade estimated to  
735 be between 6.5–11.3 My old (Table 2). This adds to a growing number of rapid radiations whose

736 phylogenies have been resolved using these loci (Larridon et al., 2019). This performance goes  
737 against a preconception that universal loci are not useful for species-level phylogenomic  
738 analysis, probably borne of experience from the low-variation plastid loci that had universal  
739 utility via PCR-based Sanger sequencing (Shaw et al., 2005), as well as related calls to move  
740 away from the lofty goal of a universal set of loci for all flowering plants and instead develop  
741 lineage-specific loci with more phylogenetic utility (Hughes et al., 2006). However, targeted  
742 sequence capture allows the isolation of loci without finicky PCR probes at a percent-divergence  
743 that allows for efficient capture over substantial evolutionary distances. Further, universal  
744 probesets, including Angiosperms353, are designed such that multiple probe sequences for  
745 each locus are included to account for sequencing variability across taxa. Instead of being  
746 limiting, the universal nature of Angiosperms353 loci are proving to be informative for both very  
747 deep (e.g., (Dodsworth et al., 2019) and very shallow (e.g., within populations of rice, (Van Andel  
748 et al., 2019) phylogenetic splits. A further attractive aspect of Angiosperms353 data is that it is  
749 cost-effective to generate, especially if pre-sequencing molecular labwork is completed by the  
750 researcher and not outsourced (Hale et al., 2020).

751         While we were able to infer relationships in *Otoba* using Angiosperms353 loci, there was  
752 very limited variation across our dataset (i.e., the proportion of variable sites in concatenated  
753 target loci was 0.285). It has been shown in other taxa that custom bait kits are more informative  
754 than Angiosperms353 loci for species-level phylogenetics (Jantzen et al., 2020), though this is  
755 not always the case (Larridon et al., 2019). It is thus possible that a custom probe kit designed  
756 for *Otoba* and close relatives would have outperformed the Angiosperms353 loci, either alone or  
757 in combination. However, developing such custom loci is predicated on the existence of  
758 genomic resources, either pre-existing or newly generated, which would have been difficult for  
759 *Otoba*. While the number of angiosperms genomic resources is constantly growing (One  
760 Thousand Plant Transcriptomes Initiative, 2019), there are still no transcriptomes or nuclear  
761 genomes available for *Otoba* and data is limited for Myristicaceae overall: there is a single  
762 transcriptome available in the 1KP database (nutmeg, *Myristica fragrans*) and no other genomic  
763 resources. Further, we currently do not have access to fresh or silica-dried tissue from *Otoba*.  
764 Because this scenario is common— especially in tropical plant groups, which tend to be  
765 understudied (Goodwin et al., 2015), the universal utility and subsequent promise of assembling  
766 a standardized set of loci across analyses is a very desirable property of the Angiosperms353  
767 loci. To facilitate standardized loci that can be combined across studies, the plant systematics  
768 community should strive for the development of searchable, long-term repositories for  
769 Angiosperms353 datasets. Any such future repository would further benefit from being linked to

770 herbarium vouchers, which would help with reproducibility of research as well as continue to  
771 extend the use of herbarium specimens in science (Lendemer et al., 2020).

772

### 773 **Conclusions**

774 *Otoba* is a recent, rapid radiation with a trans-Andean distribution whose biogeographic history  
775 suggests that key aspects of the Neotropical landscape— namely the Andean mountains and  
776 the Isthmus of Panama— have been important barriers to dispersal. It is likely that traversing  
777 these barriers has happened only rarely in the history of the genus due to dispersal limitation, a  
778 product of its relatively large seeds that rely on large-bodied vertebrates for dispersal. Very  
779 short branch lengths separating species coincide with dynamic trait evolution— a pattern  
780 consistent with sorting of ancestral variation during rapid lineage diversification. Future research  
781 into *Otoba* would ideally tackle phylogeography of widespread species, including two species  
782 that we identify as non-monophyletic: *O. novogranatensis* and *O. parvifolia*, both of which can  
783 reach very high local abundance in the communities in which they occur. These insights were  
784 gained from a relatively small phylogenomic dataset obtained via targeted sequence capture of  
785 Angiosperms353 loci from DNA extracted from herbarium specimens. We observed an impact  
786 specimen age and the environmental conditions of their collection locality on data quality. While  
787 our study highlights the promise of Angiosperms353 in herbarium-based phylogenomics, it  
788 demonstrates the challenges inherent in studying rapid radiations broadly, and, more  
789 specifically, when using DNA extracted from herbarium specimens collected in the humid  
790 tropics.

791

### 792 **Acknowledgements**

793 This research was funded by a Louisiana Board of Regents Research Competitiveness  
794 Subprogram grant and by the LSU Department of Biological Sciences. We would like to thank  
795 the Missouri Botanical Garden (MO) for their access to their important collections, and Reinaldo  
796 Aguilar, Rudy Gelis, Timothy Paine, and John Janovec for permission to use their photographs.  
797 We thank Brant Faircloth, Matthew Johnson, Carl Oliveros, and Jessie Salter for their guidance  
798 in library preparation and Brant Faircloth for access to laboratory equipment. This manuscript  
799 benefited from feedback from Laymon Ball, Janet Mansaray, and Diego Paredes-Burneo.

800

### 801 **Author Contributions**

802 LAF, DASA, and LPL conceived of the research; LAF and DS collected data and performed  
803 analyses; LAF and LPL wrote the manuscript with significant feedback from DASA and DS.

804

805 **Data Availability Statement**

806 Illumina reads will be submitted to the NCBI Sequence Read Archive (SRA) and all other  
807 data formats (tree files, alignments, character matrices, etc.) will be uploaded on the Dryad  
808 Digital Repository and made available upon publication.

809

810 **Additional Supporting Information may be found online in the supporting information.**

811

812



813  
814

### Literature Cited

- 815 Aberer, A. J., D. Krompaß, and A. Stamatakis. 2011. RogueNaRok: An efficient and exact  
816 algorithm for rogue taxon identification. *Heidelberg Institute for Theoretical Studies:*  
817 *Exelixis-RRDR-2011--10*.
- 818 Adams, R. P. 2011. DNA from herbarium specimens: II. Correlation of DNA degradation with  
819 humidity. *Phytologia* 93: 351–359.
- 820 Alrashedy, N. A., and J. Molina. 2016. The ethnobotany of psychoactive plant use: a  
821 phylogenetic perspective. *PeerJ* 4: e2546.
- 822 Antonelli, A., J. A. A. Nylander, C. Persson, and I. Sanmartín. 2009. Tracing the impact of the  
823 Andean uplift on Neotropical plant evolution. *Proceedings of the National Academy of*  
824 *Sciences of the United States of America* 106: 9749–9754.
- 825 Armstrong, J. E., and A. K. Irvine. 1989. Floral biology of *Myristica insipida* (Myristicaceae), a  
826 distinctive beetle pollination syndrome. *American Journal of Botany* 76: 86–94.
- 827 Armstrong, J. E., and S. C. Tucker. 1986. Floral development in *Myristica*. *American Journal of*  
828 *Botany* 73: 1131–1143.
- 829 Bacon, C. D., D. Silvestro, C. Jaramillo, B. T. Smith, P. Chakrabarty, and A. Antonelli. 2015.  
830 Biological evidence supports an early and complex emergence of the Isthmus of Panama.  
831 *Proceedings of the National Academy of Sciences of the United States of America* 112:  
832 6110–6115.
- 833 Bakker, F. T., D. Lei, J. Yu, S. Mohammadin, Z. Wei, S. van de Kerke, B. Gravendeel, et al.  
834 2015. Herbarium genomics: plastome sequence assembly from a range of herbarium  
835 specimens using an Iterative Organelle Genome Assembly pipeline. *Biological Journal of*  
836 *the Linnean Society* 117: 33–43.
- 837 Bebbler, D. P., M. A. Carine, J. R. I. Wood, A. H. Wortley, D. J. Harris, G. T. Prance, G. Davidse,  
838 et al. 2010. Herbaria are a major frontier for species discovery. *Proceedings of the National*  
839 *Academy of Sciences of the United States of America* 107: 22169–22171.
- 840 Bolger, A. M., M. Lohse, and B. Usadel. 2014. Trimmomatic: a flexible trimmer for Illumina  
841 sequence data. *Bioinformatics* 30: 2114–2120.
- 842 Borowiec, M. L. 2016. AMAS: a fast tool for alignment manipulation and computing of summary  
843 statistics. *PeerJ* 4: e1660.
- 844 Boubli, J. P., C. Ribas, J. W. Lynch Alfaro, M. E. Alfaro, M. N. F. da Silva, G. M. Pinho, and I. P.  
845 Farias. 2015. Spatial and temporal patterns of diversification on the Amazon: A test of the  
846 riverine hypothesis for all diurnal primates of Rio Negro and Rio Branco in Brazil. *Molecular*  
847 *Phylogenetics and Evolution* 82 Pt B: 400–412.
- 848 Brewer, G. E., J. J. Clarkson, O. Maurin, A. R. Zuntini, V. Barber, S. Bellot, N. Biggs, et al. 2019.  
849 Factors affecting targeted sequencing of 353 nuclear genes from herbarium specimens  
850 spanning the diversity of angiosperms. *Frontiers in Plant Science* 10: 1102.

- 851 Burney, C. W., and R. T. Brumfield. 2009. Ecology predicts levels of genetic differentiation in  
852 neotropical birds. *The American Naturalist* 174: 358–368.
- 853 de Candolle, A. 1856. Ordo CLXIII. Myristicaceae. *Prodromus Systematis Naturalis Regni*  
854 *Vegetabilis* 14: 189–208.
- 855 Capella-Gutiérrez, S., and J. M. Silla-Martínez. 2009. trimAl: a tool for automated alignment  
856 trimming in large-scale phylogenetic analyses. *Bioinformatics* 25: 1972–1973.
- 857 Carpenter, E. J., N. Matasci, S. Ayyampalayam, S. Wu, J. Sun, J. Yu, F. R. Jimenez Vieira, et  
858 al. 2019. Access to RNA-sequencing data from 1,173 plant species: The 1000 Plant  
859 transcriptomes initiative (1KP). *GigaScience* 8.
- 860 Chave, J., C. Sothers, A. Iribar, U. Suescun, M. W. Chase, and G. T. Prance. 2020. Rapid  
861 diversification rates in Amazonian Chrysobalanaceae inferred from plastid genome  
862 phylogenetics. *Botanical Journal of the Linnean Society*: boaa052.
- 863 Clark, K., I. Karsch-Mizrachi, D. J. Lipman, J. Ostell, and E. W. Sayers. 2016. GenBank. *Nucleic*  
864 *Acids Research* 44: D67–72.
- 865 Coates, A. G., and R. F. Stallard. 2013. How old is the Isthmus of Panama? *Bulletin of marine*  
866 *science* 89: 801–813.
- 867 Dambros, C., G. Zuquim, G. M. Moulatlet, F. R. C. Costa, H. Tuomisto, C. C. Ribas, R.  
868 Azevedo, et al. 2020. The role of environmental filtering, geographic distance and dispersal  
869 barriers in shaping the turnover of plant and animal species in Amazonia. *Biodiversity and*  
870 *Conservation*: <https://doi.org/10.1007/s10531-020-02040-3>.
- 871 De Boer, J., M. Drummond, M. Bordelon, M. Defant, H. Bellon, and R. Maury. 1995. Cenozoic  
872 magmatic phases of the Costa Rican island arc (Cordillera de Talamanca). Geologic and  
873 tectonic development of the Caribbean Plate boundary in southern Central America,  
874 Geological Society of America, Boulder, CO.
- 875 Dick, C. W., and M. Heuertz. 2008. The complex biogeographic history of a widespread tropical  
876 tree species. *Evolution* 62: 2760–2774.
- 877 Dick, C. W., S. L. Lewis, M. Maslin, and E. Bermingham. 2012. Neogene origins and implied  
878 warmth tolerance of Amazon tree species. *Ecology and Evolution* 3: 162–169.
- 879 Dodsworth, S., L. Pokorny, M. G. Johnson, J. T. Kim, O. Maurin, N. J. Wickett, F. Forest, and  
880 W. J. Baker. 2019. Hyb-Seq for flowering plant systematics. *Trends in Plant Science* 24:  
881 887–891.
- 882 Doyle, J. A., S. R. Manchester, and H. Sauquet. 2008. A seed related to Myristicaceae in the  
883 Early Eocene of southern England. *Systematic Botany* 33: 636–646.
- 884 Doyle, J. A., H. Sauquet, T. Scharaschkin, and A. Le Thomas. 2004. Phylogeny, molecular and  
885 fossil dating, and biogeographic history of Annonaceae and Myristicaceae (Magnoliales).  
886 *International Journal of Plant Sciences* 165: S55–S67.
- 887 Doyle, J. J., and E. E. Dickson. 1987. Preservation of plant samples for DNA restriction  
888 endonuclease analysis. *Taxon* 36: 715–722.

- 889 Eberhard, J. R., and E. Bermingham. 2005. Phylogeny and comparative biogeography of  
890 *Pionopsitta* parrots and *Pteroglossus* toucans. *Molecular Phylogenetics and Evolution* 36:  
891 288–304.
- 892 Edgar, R. C. 2004. MUSCLE: multiple sequence alignment with high accuracy and high  
893 throughput. *Nucleic Acids Research* 32: 1792–1797.
- 894 Faircloth, B. C. 2016. PHYLUCE is a software package for the analysis of conserved genomic  
895 loci. *Bioinformatics* 32: 786–788.
- 896 Faircloth, B. C., J. E. McCormack, N. G. Crawford, M. G. Harvey, R. T. Brumfield, and T. C.  
897 Glenn. 2012. Ultraconserved elements anchor thousands of genetic markers spanning  
898 multiple evolutionary timescales. *Systematic biology* 61: 717–726.
- 899 Fernandes, A. M., M. Cohn-Haft, T. Hrbek, and I. P. Farias. 2014. Rivers acting as barriers for  
900 bird dispersal in the Amazon. *Revista brasileira de ornitologia* 22: 363–373.
- 901 Fick, S. E., and R. J. Hijmans. 2017. WorldClim 2: new 1-km spatial resolution climate surfaces  
902 for global land areas. *International Journal of Climatology* 37: 4302–4315.
- 903 Forget, P. M., D. S. Hammond, and T. Milleron. 2002. Seasonality of Fruiting and Food  
904 Hoarding by Rodents in Neotropical Forests: Consequences for Seed Dispersal and  
905 Seedling Recruitment. In D. J. Levey, W. R. Silva, and M. Galetti [eds.], *Seed dispersal and*  
906 *frugivory: ecology, evolution and conservation.*, 241–256. CAB International, Wallingford,  
907 UK.
- 908 Forget, P.-M., T. Milleron, F. Feer, O. Henry, and G. Dubost. 2000. Effects of dispersal pattern  
909 and mammalian herbivores on seedling recruitment for *Virola michelii* (Myristicaceae) in  
910 French Guiana. *Biotropica* 32: 452–462.
- 911 Freudenstein, J. V., M. B. Broe, R. A. Folk, and B. T. Sinn. 2016. Biodiversity and the species  
912 concept—Lineages are not enough. *Systematic Biology* 66: 644–656.
- 913 Funk, V. A., M. Gostel, A. Devine, C. L. Kelloff, K. Wurdack, C. Tuccinardi, A. Radosavljevic, et  
914 al. 2017. Guidelines for collecting vouchers and tissues intended for genomic work  
915 (Smithsonian Institution): Botany Best Practices. *Biodiversity Data Journal*: e11625.
- 916 Gautier-Hion, A., J.-M. Duplantier, R. Quris, F. Feer, C. Sourd, J.-P. Decoux, G. Dubost, et al.  
917 1985. Fruit characters as a basis of fruit choice and seed dispersal in a tropical forest  
918 vertebrate community. *Oecologia* 65: 324–337.
- 919 Gentry, A. H. 1982. Neotropical floristic diversity: Phytogeographical connections between  
920 Central and South America, Pleistocene climatic fluctuations, or an accident of the Andean  
921 orogeny? *Annals of the Missouri Botanical Garden* 69: 557.
- 922 Gentry, A. H. 1979. Transfer of the species of *Dialyanthera* to *Otoba*. *Taxon* 28: 417–417.
- 923 Giraldo, P., C. Gómez-Posada, J. Martínez, and G. Kattan. 2007. Resource use and seed  
924 dispersal by red howler monkeys (*Alouatta seniculus*) in a Colombian Andean forest.  
925 *Neotropical Primates* 14: 55–64.
- 926 Goodwin, Z. A., D. J. Harris, D. Filer, J. R. I. Wood, and R. W. Scotland. 2015. Widespread  
927 mistaken identity in tropical plant collections. *Current Biology* 25: R1066–7.

- 928 Guevara Andino, J. E., N. C. A. Pitman, H. Ter Steege, H. Mogollón, C. Ceron, W. Palacios, N.  
929 Oleas, and P. V. A. Fine. 2017. Incorporating phylogenetic information for the definition of  
930 floristic districts in hyperdiverse Amazon forests: Implications for conservation. *Ecology and*  
931 *Evolution* 7: 9639–9650.
- 932 Hale, H., E. M. Gardner, J. Viruel, L. Pokorny, and M. G. Johnson. 2020. Strategies for reducing  
933 per-sample costs in target capture sequencing for phylogenomics and population genomics  
934 in plants. *Applications in plant sciences* 8: e11337.
- 935 Hallé, F., P. B. Tomlinson, and M. H. Zimmermann. 1978. Architectural variation at the specific  
936 level in tropical trees. *Tropical trees as living systems*: 209–221.
- 937 Hayes, F. E., and J.-A. N. Sewlal. 2004. The Amazon River as a dispersal barrier to passerine  
938 birds: effects of river width, habitat and taxonomy. *Journal of Biogeography* 31: 1809–1818.
- 939 Hijmans, R. J. 2020. raster: Geographic Data Analysis and Modeling. R package version 3.0-  
940 12. <https://CRAN.R-project.org/package=raster>
- 941 Holbrook, K. M. 2011. Home range and movement patterns of toucans: Implications for seed  
942 dispersal: Toucan movement patterns. *Biotropica* 43: 357–364.
- 943 Honorio Coronado, E. N., K. G. Dexter, M. L. Hart, O. L. Phillips, and R. T. Pennington. 2019.  
944 Comparative phylogeography of five widespread tree species: Insights into the history of  
945 western Amazonia. *Ecology and Evolution* 9: 7333–7345.
- 946 Hoorn, C., J. Guerrero, G. A. Sarmiento, and M. A. Lorente. 1995. Andean tectonics as a cause  
947 for changing drainage patterns in Miocene northern South America. *Geology* 23: 237–240.
- 948 Hoorn, C., R. van der Ham, F. de la Parra, S. Salamanca, H. ter Steege, H. Banks, W. Star, et  
949 al. 2019. Going north and south: The biogeographic history of two Malvaceae in the wake  
950 of Neogene Andean uplift and connectivity between the Americas. *Review of palaeobotany*  
951 *and palynology* 264: 90–109.
- 952 Hoorn, C., F. P. Wesselingh, H. ter Steege, M. A. Bermudez, A. Mora, J. Sevink, I. Sanmartín,  
953 et al. 2010. Amazonia through time: Andean uplift, climate change, landscape evolution,  
954 and biodiversity. *Science* 330: 927–931.
- 955 Howe, H. F., and G. A. Kerckhove. 1980. Nutmeg dispersal by tropical birds. *Science* 210: 925–  
956 927.
- 957 Howe, H. F., and G. A. Vande Kerckhove. 1981. Removal of wild nutmeg (*Virola surinamensis*)  
958 crops by birds. *Ecology* 62: 1093–1106.
- 959 Hughes, C. E. 2016. The tropical Andean plant diversity powerhouse. *The New Phytologist* 210:  
960 1152–1154.
- 961 Hughes, C. E., R. J. Eastwood, and C. Donovan Bailey. 2006. From famine to feast? Selecting  
962 nuclear DNA sequence loci for plant species-level phylogeny reconstruction. *Philosophical*  
963 *Transactions of the Royal Society B* 361: 211–225.
- 964 Jantzen, J. R., P. Amarasinghe, R. A. Folk, M. Reginato, F. A. Michelangeli, D. E. Soltis, N.  
965 Cellinese, and P. S. Soltis. 2020. A two-tier bioinformatic pipeline to develop probes for  
966 target capture of nuclear loci with applications in Melastomataceae. *Applications in plant*

- 967           *sciences*: e11345.
- 968   Janzen, D. H. 1967. Why mountain passes are higher in the tropics. *The American Naturalist*  
969       101: 233–249.
- 970   Jaramillo, T. S., P. Muriel, and H. Balslev. 2004. Myristicaceae. In G. W. Harling, and L.  
971       Andersson [eds.], *Flora of Ecuador*, 1–101.
- 972   Jaramillo, T. S., P. Muriel, W. A. Rodrigues, and H. Balslev. 2000. Myristicaceae novelties from  
973       Ecuador. *Nordic journal of botany* 20: 443–447.
- 974   Jaramillo-Vivanco, T. S., and H. Balslev. 2020. Revision of *Otoba* (Myristicaceae). *Phytotaxa*  
975       441: 143–175.
- 976   Jardim, M. A. G., and C. G. da Mota. 2007. Biologia floral de *Virola surinamensis* (Rol.) Warb.  
977       (Myristicaceae). *Revista Árvore* 31: 1155–1162.
- 978   Johnson, M. G., E. M. Gardner, Y. Liu, R. Medina, B. Goffinet, A. J. Shaw, N. J. C. Zerega, and  
979       N. J. Wickett. 2016. HybPiper: Extracting coding sequence and introns for phylogenetics  
980       from high-throughput sequencing reads using target enrichment. *Applications in Plant*  
981       *Sciences* 4: apps.1600016.
- 982   Johnson, M. G., L. Pokorny, S. Dodsworth, L. R. Botigué, R. S. Cowan, A. Devault, W. L.  
983       Eiserhardt, et al. 2019. A universal probe set for targeted sequencing of 353 nuclear genes  
984       from any flowering plant designed using k-Medoids clustering. *Systematic Biology* 68: 594–  
985       606.
- 986   Kanstrup, J., and J. M. Olesen. 2000. Plant-flower visitor interactions in a neotropical rain forest  
987       canopy: community structure and generalisation level. In Totland, Ø., Armbruster, W.S.,  
988       Fenster, C., Molau, U., Nilsson, L.A., Olesen, J.M., Ollerton, J., Philipp, M., Ågren, J. [ed.],  
989       The Scandinavian Association for Pollination ecology honours Knut Fægri, 33–42. The  
990       Norwegian Academy of Science and Letters 39, Oslo.
- 991   Kato, K., and D. M. Standley. 2013. MAFFT multiple sequence alignment software version 7:  
992       improvements in performance and usability. *Molecular Biology and Evolution* 30: 772–780.
- 993   Lagomarsino, L. P., F. L. Condamine, A. Antonelli, A. Mulch, and C. C. Davis. 2016. The abiotic  
994       and biotic drivers of rapid diversification in Andean bellflowers (Campanulaceae). *The New*  
995       *Phytologist*.
- 996   Lagomarsino, L. P., and L. A. Frost. 2020. The central role of taxonomy in the study of  
997       Neotropical biodiversity. *Annals of the Missouri Botanical Garden* 105: 405–421.
- 998   Larridon, I., T. Villaverde, A. R. Zuntini, L. Pokorny, G. E. Brewer, N. Epiawalage, I. Fairlie, et  
999       al. 2019. Tackling rapid radiations with targeted sequencing. *Frontiers in Plant Science* 10:  
1000       1655.
- 1001   Larsson, A. 2014. AliView: a fast and lightweight alignment viewer and editor for large datasets.  
1002       *Bioinformatics* 30: 3276–3278.
- 1003   Lendemer, J., B. Thiers, A. K. Monfils, J. Zaspel, E. R. Ellwood, A. Bentley, K. LeVan, et al.  
1004       2020. The Extended Specimen Network: A strategy to enhance US biodiversity collections,  
1005       promote research and education. *Bioscience* 70: 23–30.



- 1006 Macía, M. J. 2008. Woody plants diversity, floristic composition and land use history in the  
1007 Amazonian rain forests of Madidi National Park, Bolivia. *Biodiversity and Conservation* 17:  
1008 2671–2690.
- 1009 Magallón, S., S. Gómez-Acevedo, L. L. Sánchez-Reyes, and T. Hernández-Hernández. 2015. A  
1010 metacalibrated time-tree documents the early rise of flowering plant phylogenetic diversity.  
1011 *The New Phytologist* 207: 437–453.
- 1012 Martínez, C., C. Jaramillo, A. Correa-Metrío, W. Crepet, J. E. Moreno, A. Aliaga, F. Moreno, et  
1013 al. 2020. Neogene precipitation, vegetation, and elevation history of the Central Andean  
1014 Plateau. *Science Advances* 6: eaaz4724.
- 1015 Massana, K. A., J. M. Beaulieu, N. J. Matzke, and B. C. O'Meara. 2015. Non-null effects of the  
1016 null range in biogeographic models: Exploring parameter estimation in the DEC model.  
1017 *bioRxiv*: 026914.
- 1018 Massoni, J., T. L. P. Couvreur, and H. Sauquet. 2015. Five major shifts of diversification through  
1019 the long evolutionary history of Magnoliidae (angiosperms). *BMC Evolutionary Biology* 15:  
1020 49.
- 1021 Massoni, J., F. Forest, and H. Sauquet. 2014. Increased sampling of both genes and taxa  
1022 improves resolution of phylogenetic relationships within Magnoliidae, a large and early-  
1023 diverging clade of angiosperms. *Molecular Phylogenetics and Evolution* 70: 84–93.
- 1024 Matzke, N. J. 2014. Model selection in historical biogeography reveals that founder-event  
1025 speciation is a crucial process in island clades. *Systematic Biology* 63: 951–970.
- 1026 Matzke, N. J. 2013. Probabilistic historical biogeography: new models for founder-event  
1027 speciation, imperfect detection, and fossils allow improved accuracy and model-testing.  
1028 *Frontiers of Biogeography* 5.
- 1029 Matzke, N. J. 2013b. BioGeoBEARS: BioGeography with Bayesian (and Likelihood)  
1030 Evolutionary Analysis in R scripts. R package, version 0.2.1. [http://CRAN.R-](http://CRAN.R-project.org/package=BioGeoBEARS)  
1031 [project.org/package=BioGeoBEARS](http://CRAN.R-project.org/package=BioGeoBEARS)
- 1032 Melo, F. P. L., B. Rodriguez-Herrera, R. L. Chazdon, R. A. Medellín, and G. G. Ceballos. 2009.  
1033 Small tent-roosting bats promote dispersal of large-seeded plants in a Neotropical forest.  
1034 *Biotropica* 41: 737–743.
- 1035 Moreira, J. I., P. Riba-Hernández, and J. A. Lobo. 2017. Toucans (*Ramphastos ambiguus*)  
1036 facilitate resilience against seed dispersal limitation to a large-seeded tree (*Virola*  
1037 *surinamensis*) in a human-modified landscape. *Biotropica* 49: 502–510.
- 1038 Myster, R. W. 2020. Disturbance and response in the Andean cloud forest: a conceptual review.  
1039 *The Botanical Review* 86: 119–135.
- 1040 Nathan, R., F. M. Schurr, O. Spiegel, O. Steinitz, A. Trakhtenbrot, and A. Tsoar. 2008.  
1041 Mechanisms of long-distance seed dispersal. *Trends in Ecology & Evolution* 23: 638–647.
- 1042 Nazareno, A. G., C. W. Dick, and L. G. Lohmann. 2017. Wide but not impermeable: Testing the  
1043 riverine barrier hypothesis for an Amazonian plant species. *Molecular Ecology* 26: 3636–  
1044 3648.

- 1045 Nuñez-Iturri, G., and H. F. Howe. 2007. Bushmeat and the fate of trees with seeds dispersed by  
1046 large primates in a lowland rain forest in Western Amazonia. *Biotropica* 39: 348–354.
- 1047 O’Dea, A., H. A. Lessios, A. G. Coates, R. I. Eytan, S. A. Restrepo-Moreno, A. L. Cione, L. S.  
1048 Collins, et al. 2016. Formation of the Isthmus of Panama. *Science Advances* 2: e1600883.
- 1049 Oliveira, U., M. F. Vasconcelos, and A. J. Santos. 2017. Biogeography of Amazon birds: rivers  
1050 limit species composition, but not areas of endemism. *Scientific Reports* 7: 2992.
- 1051 One Thousand Plant Transcriptomes Initiative. 2019. One thousand plant transcriptomes and  
1052 the phylogenomics of green plants. *Nature* 574: 679–685.
- 1053 Paradis, E., and K. Schliep. 2019. ape 5.0: an environment for modern phylogenetics and  
1054 evolutionary analyses in R. *Bioinformatics* 35: 526–528.
- 1055 Pease, J. B., D. C. Haak, M. W. Hahn, and L. C. Moyle. 2016. Phylogenomics reveals three  
1056 sources of adaptive variation during a rapid radiation. *PLoS Biology* 14: e1002379.
- 1057 Pennington, R. T., and M. Lavin. 2016. The contrasting nature of woody plant species in  
1058 different Neotropical forest biomes reflects differences in ecological stability. *The New*  
1059 *Phytologist* 210: 25–37.
- 1060 Pennington, R. T., M. Lavin, T. Särkinen, G. P. Lewis, B. B. Klitgaard, and C. E. Hughes. 2010.  
1061 Contrasting plant diversification histories within the Andean biodiversity hotspot.  
1062 *Proceedings of the National Academy of Sciences of the United States of America* 107:  
1063 13783–13787.
- 1064 Pérez-Escobar, O. A., M. Gottschling, G. Chomicki, F. L. Condamine, B. B. Klitgård, E.  
1065 Pansarin, and G. Gerlach. 2017. Andean mountain building did not preclude dispersal of  
1066 lowland epiphytic orchids in the Neotropics. *Scientific Reports* 7: 4919.
- 1067 Pérez-Escobar, O. A., E. Lucas, C. Jaramillo, A. Monro, S. K. Morris, D. Bogarín, D. Greer, et  
1068 al. 2019. The origin and diversification of the hyperdiverse flora in the Chocó biogeographic  
1069 region. *Frontiers in Plant Science* 10: 1328.
- 1070 Pirie, M. D., P. J. M. Maas, R. A. Wilschut, H. Melchers-Sharrott, and L. W. Chatrou. 2018.  
1071 Parallel diversifications of *Crematosperma* and *Mosannonna* (Annonaceae), tropical  
1072 rainforest trees tracking Neogene upheaval of South America. *Royal Society open science*  
1073 5: 171561.
- 1074 Pitman, N. C. A., P. N. Vargas, and J. W. Terborgh. 2017. Árboles comunes de los bosques  
1075 inundados de Madre de Dios. *Biodiversidad Amazónica Vol 5* 1.
- 1076 Pyle, M. M., and R. P. Adams. 1989. In situ preservation of DNA in plant specimens. *Taxon* 38:  
1077 576–581.
- 1078 Qiu, Y.-L., L. Li, T. A. Hendry, R. Li, D. W. Taylor, M. J. Issa, A. J. Ronen, et al. 2006.  
1079 Reconstructing the basal angiosperm phylogeny: evaluating information content of  
1080 mitochondrial genes. *Taxon* 55: 837–856.
- 1081 Queenborough, S. A., D. F. R. P. Burslem, N. C. Garwood, and R. Valencia. 2007a.  
1082 Determinants of biased sex ratios and inter-sex costs of reproduction in dioecious tropical  
1083 forest trees. *American Journal of Botany* 94: 67–78.

- 1084 Queenborough, S. A., D. F. R. P. Burslem, N. C. Garwood, and R. Valencia. 2007b. Habitat  
1085 niche partitioning by 16 species of Myristicaceae in Amazonian Ecuador. *Plant Ecology*  
1086 192: 193–207.
- 1087 Queenborough, S. A., D. F. R. P. Burslem, N. C. Garwood, and R. Valencia. 2007c.  
1088 Neighborhood and community interactions determine the spatial pattern of tropical tree  
1089 seedling survival. *Ecology* 88: 2248–2258.
- 1090 Rabeler, R. K., H. T. Svoboda, B. Thiers, L. A. Prather, J. A. Macklin, L. P. Lagomarsino, L. C.  
1091 Majure, and C. J. Ferguson. 2019. Herbarium practices and ethics, III. *Systematic Botany*  
1092 44: 7–13.
- 1093 Revell, L. J. 2012. phytools: an R package for phylogenetic comparative biology (and other  
1094 things). *Methods in Ecology and Evolution* 3: 217–223.
- 1095 Ripperger, S. P., M. Tschapka, E. K. V. Kalko, B. Rodriguez-Herrera, and F. Mayer. 2013. Life  
1096 in a mosaic landscape: anthropogenic habitat fragmentation affects genetic population  
1097 structure in a frugivorous bat species. *Conservation Genetics* 14: 925–934.
- 1098 Russo, S. E. 2003. Responses of dispersal agents to tree and fruit traits in *Virola calophylla*  
1099 (Myristicaceae): implications for selection. *Oecologia* 136: 80–87.
- 1100 Rymer, P. D., C. W. Dick, G. G. Vendramin, A. Buonamici, and D. Boshier. 2013. Recent  
1101 phylogeographic structure in a widespread ‘weedy’ Neotropical tree species, *Cordia*  
1102 *alliodora* (Boraginaceae): Phylogeography of a widespread tropical tree species. *Journal of*  
1103 *Biogeography* 40: 693–706.
- 1104 Sandoval-H, J., J. P. Gómez, and C. D. Cadena. 2017. Is the largest river valley west of the  
1105 Andes a driver of diversification in Neotropical lowland birds? *The Auk: Ornithological*  
1106 *Advances* 134: 168–180.
- 1107 Santamaría-Aguilar, D., R. Aguilar, and L. P. Lagomarsino. 2019. A taxonomic synopsis of  
1108 *Virola* (Myristicaceae) in Mesoamerica, including six new species. *PhytoKeys* 134: 1–82.
- 1109 Santamaría-Aguilar, D., J. E. Jiménez, and R. Aguilar. 2019. *Otoba vespertilio* (Myristicaceae),  
1110 una especie nueva de Mesoamérica. *Brittonia* 71: 369–380.
- 1111 Särkinen, T., R. T. Pennington, M. Lavin, M. F. Simon, and C. E. Hughes. 2012. Evolutionary  
1112 islands in the Andes: persistence and isolation explain high endemism in Andean dry  
1113 tropical forests. *Journal of Biogeography* 39: 884–900.
- 1114 Särkinen, T., M. Staats, J. E. Richardson, R. S. Cowan, and F. T. Bakker. 2012. How to open  
1115 the treasure chest? Optimising DNA extraction from herbarium specimens. *PLoS One* 7:  
1116 e43808.
- 1117 Sauquet, H., J. A. Doyle, T. Scharaschkin, T. Borsch, K. W. Hilu, L. W. Chatrou, and A. Le  
1118 Thomas. 2003. Phylogenetic analysis of Magnoliales and Myristicaceae based on multiple  
1119 data sets: implications for character evolution. *Botanical Journal of the Linnean Society*  
1120 142: 125–186.
- 1121 Sauquet, H., and A. Le Thomas. 2003. Pollen diversity and evolution in Myristicaceae  
1122 (Magnoliales). *International Journal of Plant Sciences* 164: 613–628.

- 1123 Schley, R. J., M. de la Estrella, O. A. Pérez-Escobar, A. Bruneau, T. Barraclough, F. Forest, and  
1124 B. Klitgård. 2018. Is Amazonia a 'museum' for Neotropical trees? The evolution of the  
1125 *Brownea* clade (Detarioideae, Leguminosae). *Molecular Phylogenetics and Evolution* 126:  
1126 279–292.
- 1127 Sharma, M. V., and J. E. Armstrong. 2013. Pollination of *Myristica* and other nutmegs in natural  
1128 populations. *Tropical Conservation Science* 6: 595–607.
- 1129 Shaw, J., E. B. Lickey, J. T. Beck, S. B. Farmer, W. Liu, J. Miller, K. C. Siripun, et al. 2005. The  
1130 tortoise and the hare II: relative utility of 21 noncoding chloroplast DNA sequences for  
1131 phylogenetic analysis. *American Journal of Botany* 92: 142–166.
- 1132 Shee, Z. Q., D. G. Frodin, R. Cámara-Leret, and L. Pokorny. 2020. Reconstructing the complex  
1133 evolutionary history of the Papuan *Schefflera* radiation through herbariomics. *Frontiers in*  
1134 *Plant Science* 11: 258.
- 1135 Sinnott-Armstrong, M. A., A. E. Downie, S. Federman, A. Valido, P. Jordano, and M. J.  
1136 Donoghue. 2018. Global geographic patterns in the colours and sizes of animal-dispersed  
1137 fruits. *Global Ecology and Biogeography* 27: 1339–1351.
- 1138 Soltis, D. E., M. A. Gitzendanner, and P. S. Soltis. 2007. A 567-taxon data set for angiosperms:  
1139 The challenges posed by Bayesian analyses of large data sets. *International Journal of*  
1140 *Plant sciences* 168: 137–157.
- 1141 Stamatakis, A. 2014. RAxML version 8: a tool for phylogenetic analysis and post-analysis of  
1142 large phylogenies. *Bioinformatics* 30: 1312–1313.
- 1143 ter Steege, H., N. C. A. Pitman, O. L. Phillips, J. Chave, D. Sabatier, A. Duque, J.-F. Molino, et  
1144 al. 2006. Continental-scale patterns of canopy tree composition and function across  
1145 Amazonia. *Nature* 443: 444–447.
- 1146 Štorchová, H., R. Hrdličková, J. Chrtěk Jr., M. Tetera, D. Fitze, and J. Fehrer. 2000. An  
1147 improved method of DNA isolation from plants collected in the field and conserved in  
1148 saturated NaCl/CTAB solution. *Taxon* 49: 79–84.
- 1149 Struth, L., J. Babault, and A. Teixell. 2015. Drainage reorganization during mountain building in  
1150 the river system of the Eastern Cordillera of the Colombian Andes. *Geomorphology* 250:  
1151 370–383.
- 1152 Swamy, V. 2017. Forest composition and spatial patterns across a Western Amazonian River  
1153 basin: The influence of plant-animal interactions. In R. W. Myster [ed.], *Forest structure,*  
1154 *function and dynamics in Western Amazonia*, 159–180. John Wiley & Sons, Ltd,  
1155 Chichester, UK.
- 1156 Terborgh, J., P. Alvarez-Loayza, K. Dexter, F. Cornejo, and C. Carrasco. 2011. Decomposing  
1157 dispersal limitation: limits on fecundity or seed distribution? *The Journal of Ecology* 99:  
1158 935–944.
- 1159 Turchetto-Zolet, A. C., F. Cruz, G. G. Vendramin, M. F. Simon, F. Salgueiro, M. Margis-  
1160 Pinheiro, and R. Margis. 2012. Large-scale phylogeography of the disjunct Neotropical tree  
1161 species *Schizolobium parahyba* (Fabaceae-Caesalpinioideae). *Molecular Phylogenetics*  
1162 *and Evolution* 65: 174–182.

- 1163 Valderrama, E., C. Sass, M. Pinilla-Vargas, D. Skinner, P. J. M. Maas, H. Maas-van de Kamer,  
1164 J. B. Landis, et al. 2020. Unraveling the spiraling radiation: A phylogenomic analysis of  
1165 Neotropical *Costus* L. *Frontiers in Plant Science* 11: 1195.
- 1166 Van Andel, T., M. A. Veltman, A. Bertin, H. Maat, T. Polime, D. Hille Ris Lambers, J. Tjoe Awie,  
1167 et al. 2019. Hidden rice diversity in the Guianas. *Frontiers in Plant Science* 10: 1161.
- 1168 Wheelwright, N. T., and C. H. Janson. 1985. Colors of fruit displays of bird-dispersed plants in  
1169 two tropical forests. *The American Naturalist* 126: 777–799.
- 1170 Wittmann, F., J. Schongart, J. C. Montero, T. Motzer, W. J. Junk, M. T. F. Piedade, H. L.  
1171 Queiroz, and M. Worbes. 2006. Tree species composition and diversity gradients in white-  
1172 water forests across the Amazon Basin. *Journal of Biogeography* 33: 1334–1347.
- 1173 Yu, Y., A. J. Harris, C. Blair, and X. He. 2015. RASP (Reconstruct Ancestral State in  
1174 Phylogenies): a tool for historical biogeography. *Molecular Phylogenetics and Evolution* 87:  
1175 46–49.
- 1176 Zhang, C., M. Rabiee, E. Sayyari, and S. Mirarab. 2018. ASTRAL-III: polynomial time species  
1177 tree reconstruction from partially resolved gene trees. *BMC Bioinformatics* 19: 153.
- 1178
- 1179
- 1180
- 1181



1182 **Table 1.** Summary of sequence data recovered for each sample for targeted and off-target  
 1183 (cpDNA) loci. Asterisks at sample names indicate samples that were not included in any  
 1184 phylogenetic analysis. Samples for which there was insufficient cpDNA data to include in  
 1185 phylogenetic analyses are marked with “n/a”.  
 1186

| Sample                                | Average sequence length | number of loci | ungapped bp cpDNA | Collection Year | Annual precipitation (mm) |
|---------------------------------------|-------------------------|----------------|-------------------|-----------------|---------------------------|
| <i>Otoba acuminata</i> _MM2720        | 209.25                  | 4              | 39,553            | 2001            | 3,021                     |
| <i>Otoba cyclobasis</i> _MT281        | 183.9                   | 73             | 3,399             | 1993            | 2,265                     |
| <i>Otoba glycyarpa</i> _LV25198       | 227.88                  | 96             | 32,401            | 2013            | 1,842                     |
| <i>Otoba gordonifolia</i> _RZ196      | 206.51                  | 61             | 20,318            | 1996            | 1,933                     |
| <i>Otoba gracilipes</i> _DC884*       | 192                     | 2              | n/a               | 1987            | 3,065                     |
| <i>Otoba latialata</i> _RC4751        | 244.39                  | 142            | 42,374            | 1987            | 2,610                     |
| <i>Otoba novogranatensis</i> _AG476   | 102                     | 1              | 3,533             | 1993            | 3,048                     |
| <i>Otoba novogranatensis</i> _CK681   | 174                     | 2              | 13,653            | 1988            | 3,499                     |
| <i>Otoba novogranatensis</i> _EB500*  | 208.91                  | 11             | n/a               | 1988            | 3,524                     |
| <i>Otoba novogranatensis</i> _GP2325  | 186.75                  | 4              | 41,378            | 1992            | 2,057                     |
| <i>Otoba novogranatensis</i> _LG20482 | 299.92                  | 157            | 111,863           | 1983            | 3,244                     |
| <i>Otoba novogranatensis</i> _WP16081 | 90                      | 1              | 47,902            | 1993            | 2,326                     |
| <i>Otoba novogranatensis</i> _WS36336 | 457.56                  | 217            | n/a               | 2015            | 1,864                     |
| <i>Otoba parvifolia</i> _DN9151*      | 183                     | 4              | n/a               | 1989            | 3,870                     |
| <i>Otoba parvifolia</i> _MN37243      | 173.47                  | 17             | 28,315            | 1988            | 1,449                     |
| <i>Otoba parvifolia</i> _MS1182       | 139.5                   | 6              | 72,683            | 1995            | 2,109                     |
| <i>Otoba parvifolia</i> _RV19070      | 215.62                  | 86             | n/a               | 1994            | 2,095                     |

|                                         |        |    |       |      |       |
|-----------------------------------------|--------|----|-------|------|-------|
| <b><i>Otoba sp. nov._JP16902*</i></b>   | 145.41 | 17 | n/a   | 1992 | 2,438 |
| <b><i>Otoba sp. nov._RC5752*</i></b>    | 126    | 5  | n/a   | 1987 | 3,732 |
| <b><i>Otoba vespertilio_GM12543</i></b> | 131    | 3  | 1,532 | 1988 | 3,561 |

1187

1188

1189

1190 **Table 2.** Divergence times (Ma) for major clades of *Otoba* estimated from penalized likelihood  
 1191 analyses based on different calibrations from Magallon et al. (2015) and Massoni et al. (2015).  
 1192

|                                                                 | Magallon et al. (2015) |               |             |               |             |               | Massoni et al. (2015) |               |             |               |             |               |
|-----------------------------------------------------------------|------------------------|---------------|-------------|---------------|-------------|---------------|-----------------------|---------------|-------------|---------------|-------------|---------------|
|                                                                 | UCLN median            |               | UCLN min    |               | UCLN max    |               | UCLN mean             |               | UCLN min    |               | UCLN max    |               |
|                                                                 | calibration            | estimated age | calibration | estimated age | calibration | estimated age | calibration           | estimated age | calibration | estimated age | calibration | estimated age |
| <b>Magnoliales + Laurales</b>                                   | 127.70                 | —             | 121.80      | —             | 131.77      | —             | 134.15                | —             | 121.34      | —             | 161.65      | —             |
| <b>Laurales</b>                                                 | 114.90                 | —             | 109.07      | —             | 120.64      | —             | 122.16                | —             | 112.05      | —             | 145.59      | —             |
| <b>Magnoliales</b>                                              | 109.59                 | —             | 108.14      | —             | 112.32      | —             | 123.86                | —             | 114.75      | —             | 145.66      | —             |
| <b>Myristicaceae</b>                                            | —                      | 19.09         | —           | 18.55         | —           | 19.66         | 29.07                 | —             | 14.70       | —             | 51.51       | —             |
| <b><i>Otoba</i></b>                                             | —                      | 7.28          | —           | 7.04          | —           | 7.51          | —                     | 8.69          | —           | 6.57          | —           | 11.36         |
| <b>So. Am. <i>O. novogranatensis</i> clade</b>                  | —                      | 5.82          | —           | 5.62          | —           | 6.00          | —                     | 6.60          | —           | 5.47          | —           | 8.23          |
| <b>Eastern Andean/Amazonian + Western Andean/Cen. Am. clade</b> | —                      | 6.54          | —           | 6.32          | —           | 6.75          | —                     | 7.67          | —           | 5.98          | —           | 9.83          |
| <b>Eastern Andean/Amazonian clade</b>                           | —                      | 4.13          | —           | 3.99          | —           | 4.27          | —                     | 4.57          | —           | 4.01          | —           | 5.61          |
| <b>Western Andean/Central American clade</b>                    | —                      | 6.21          | —           | 6.00          | —           | 6.41          | —                     | 7.25          | —           | 5.71          | —           | 9.26          |

1193  
 1194
