# Supplementary material for: Niche evolution of the Neotropical tree genus Otoba in the context of global biogeography of the nutmeg family, Myristicaceae
Source: bioRxiv or medRxiv preprint supplement (doi:10.1101/2020.10.02.324368), 2021-09-03

## Online Supplemental Material

**Appendix S.1.** Sample ID; Taxon (Accepted Name); Voucher (Herbarium); Provenance; [Latitude, Longitude].

Otoba\_acuminata\_MM2720; **Otoba acuminata** (Standl.) A.H. Gentry; Mary Merello, Allison Miller & Beatriz Wong 2720 (MO); Panama; [09°13'10"N, 079°21'38"W].

Otoba\_cyclobasis\_MT281; **Otoba cyclobasis** T.S.Jaram. & Balslev; Milton Tirado, E. Albuja & M. Chapiro 281 (MO); Ecuador; [00°43'N, 078°53'W]. Otoba\_glycycarpa\_LV25198; **Otoba glycycarpa** (Ducke) W.A.Rodrigues & T.S.Jaram.; Luis Valenzuela G., Jaime Flores, Gerry Shareva M., et al. 25198 (MO); Peru; [11°21'39"S 074°02'31"W]. Otoba\_gordoniiifolia\_RZ196; **Otoba gordoniiifolia** (A. DC.) A.H. Gentry; R.A. Zahawi 196 (MO); Ecuador; [00°05'N, 079°40'W]. Otoba\_gracilipes\_DC884; **Otoba gracilipes** (A.C. Sm.) A.H. Gentry; D. Cárdenas L. 884 (MO); Colombia; [7°26'20.0"N, 77°07'15.8"W]. Otoba\_latialata\_RC4751; **Otoba latialata** (Pittier) A.H. Gentry; R. Callejas et al. 4751 (MO); Colombia; [7°0'59.36"N, 76°18'31.52"W]. Otoba\_novogranatensis\_AG476; **Otoba novogranatensis** Moldenke; A. Grijalva, C. Aulestia & J. Taicúz 476 (MO); Ecuador; [01°02'N, 078°15'W]. Otoba\_novogranatensis\_CK681; **Otoba novogranatensis** Moldenke; C. Kernan & P. Phillips 681 (MO); Costa Rica; [08°27'N, 083°33'W]. Otoba\_novogranatensis\_EB500; **Otoba novogranatensis** Moldenke; E. Bello C. 500 (MO); Costa Rica; [10°18'36"N, 084°42'00"W]. Otoba\_novogranatensis\_GP2325; **Otoba novogranatensis** Moldenke; G. A. Tipaz, P. Méndez, H. Vargas & M. Chapiro 2325 (MO); Ecuador; [00°45'N, 078°47'W]. Otoba\_novogranatensis\_LG20482; **Otoba novogranatensis** Moldenke; L. D. Gómez P., R. L. Liesner & E. J. Judziewicz 20482 (MO); Costa Rica; [09°38'24"N, 082°48'30"W]. Otoba\_novogranatensis\_WP16081; **Otoba novogranatensis** Moldenke; W. A. Palacios & M. Tirado 16081 (MO); Ecuador; [00°45'N, 078°56'W]. Otoba\_novogranatensis\_WS36336; **Otoba novogranatensis** Moldenke; W. D. Stevens & O. M. Montiel J. 36336 (MO); Nicaragua; [12°17'36"N, 085°05'58"W]. Otoba\_parvifolia\_DN9151; **Otoba parvifolia** (Markgr.) A.H. Gentry; D. A. Neill, F. Hurtado & A. A. Alvarado 9151 (MO); Ecuador, Napo; [00°36'S, 077°23'W]. Otoba\_parvifolia\_MN37243; **Otoba parvifolia** (Markgr.) A.H. Gentry; M. H. Nee 37243 (MO); Bolivia; [17°39'S, 063°43'W]. Otoba\_parvifolia\_MS1182; **Otoba parvifolia** (Markgr.) A.H. Gentry; M.S. Silveira 1182 (MO); Brazil, Acre; [08°17'48"S, 071°08'36"W]. Otoba\_parvifolia\_RV19070; **Otoba parvifolia** (Markgr.) A.H. Gentry; R. Vásquez & R. Apanú 19070 (MO); 08 September 1994; Peru, Amazonas, Condorcanqui; 320 m; [04°51'S, 078°18'W]. Otoba\_sp\_nov\_JP16902; **n/a**; J. J. Pipoly, III, Á. Cogollo P. et al. 16902 (MO); Colombia; [06°29'N, 076°14'W]. Otoba\_sp\_nov\_RC5752; **n/a**; R. Callejas, R. Fonnegra G., F. J. Roldán & A. L. Arbeláez 5752 (MO); Colombia; [07°20'N, 076°30'W]. Otoba\_vespertilio\_GM12543; **Otoba vespertilio** D. Santam. & J.E. Jiménez; Gordon McPherson 12543 (MO); Panama; [08°47'03"N, 082°10'52"W].

## Figure Legends for Appendix S2-S37

**Appendix S.2.** Heatmap showing the percent reference protein length recovered for all samples across all 353 loci.

**Appendix S.3.** AMAS summary statistics for each locus.

**Appendix S.4.** Maximum likelihood results for combined nuclear data excluding *O. vespertilio*. Topology with branchlengths shown above with relationships clarified and support values shown on the cladogram below.

**Appendix S.5.** Maximum likelihood results for chloroplast data. Topology with branchlengths shown above with relationships clarified and support values shown on the cladogram below.

**Appendix S.6.** Maximum likelihood results for combined chloroplast and nuclear data including *O. vespertilio*. Topology with branchlengths shown above with relationships clarified and support values shown on the cladogram below.

**Appendix S.7.** Penalized likelihood divergence time estimations calibrated from minimum (top), median (middle), and maximum (bottom) UCLN dates in Magallón et al. (2015).

**Appendix S.8.** Penalized likelihood divergence time estimations calibrated from minimum (top), mean (middle), and maximum (bottom) UCLN dates in Massoni et al. (2015).

**Appendix S.9.** Discrete ancestral character estimation for anther shape.

**Appendix S.10.** Discrete ancestral character estimation for aril color.

**Appendix S.11.** Discrete ancestral character estimation for the presence, absence of extrastaminal discs.

**Appendix S.12.** Discrete ancestral character estimation for filament shape.

**Appendix S.13.** Discrete ancestral character estimation for the presence, absence of gynoeceium pubescence.

**Appendix S.14.** Discrete ancestral character estimation for color of leaf abaxial pubescence.

**Appendix S.15.** Discrete ancestral character estimation for leaf abaxial pubescence.

**Appendix S.16.** Discrete ancestral character estimation for petiole wingedness.

**Appendix S.17.** Discrete ancestral character estimation for the presence, absence of intramarginal veins.

**Appendix S.18.** Discrete ancestral character estimation for the presence, absence of seed prickles.

**Appendix S.20.** Continuous ancestral character estimation for androecium length.

- Appendix S.21.** Continuous ancestral character estimation for anther length.
- Appendix S.22.** Continuous ancestral character estimation for fruit length.
- Appendix S.23.** Continuous ancestral character estimation for fruit width.
- Appendix S.24.** Continuous ancestral character estimation for gynoecium length.
- Appendix S.25.** Continuous ancestral character estimation for lamina length.
- Appendix S.26.** Continuous ancestral character estimation for lamina width.
- Appendix S.27.** Continuous ancestral character estimation for ovary length.
- Appendix S.28.** Continuous ancestral character estimation for ovary width.
- Appendix S.29.** Continuous ancestral character estimation for pericarp thickness.
- Appendix S.30.** Continuous ancestral character estimation for petiole length.
- Appendix S.31.** Continuous ancestral character estimation for petiole width.
- Appendix S.32.** Continuous ancestral character estimation for pistillate perianth length.
- Appendix S.33.** Continuous ancestral character estimation for number of secondary veins.
- Appendix S.34.** Continuous ancestral character estimation for seed length.
- Appendix S.35.** Continuous ancestral character estimation for seed width.
- Appendix S.36.** Continuous ancestral character estimation for staminate pedicel length.
- Appendix S.37.** Continuous ancestral character estimation for staminate perianth length.

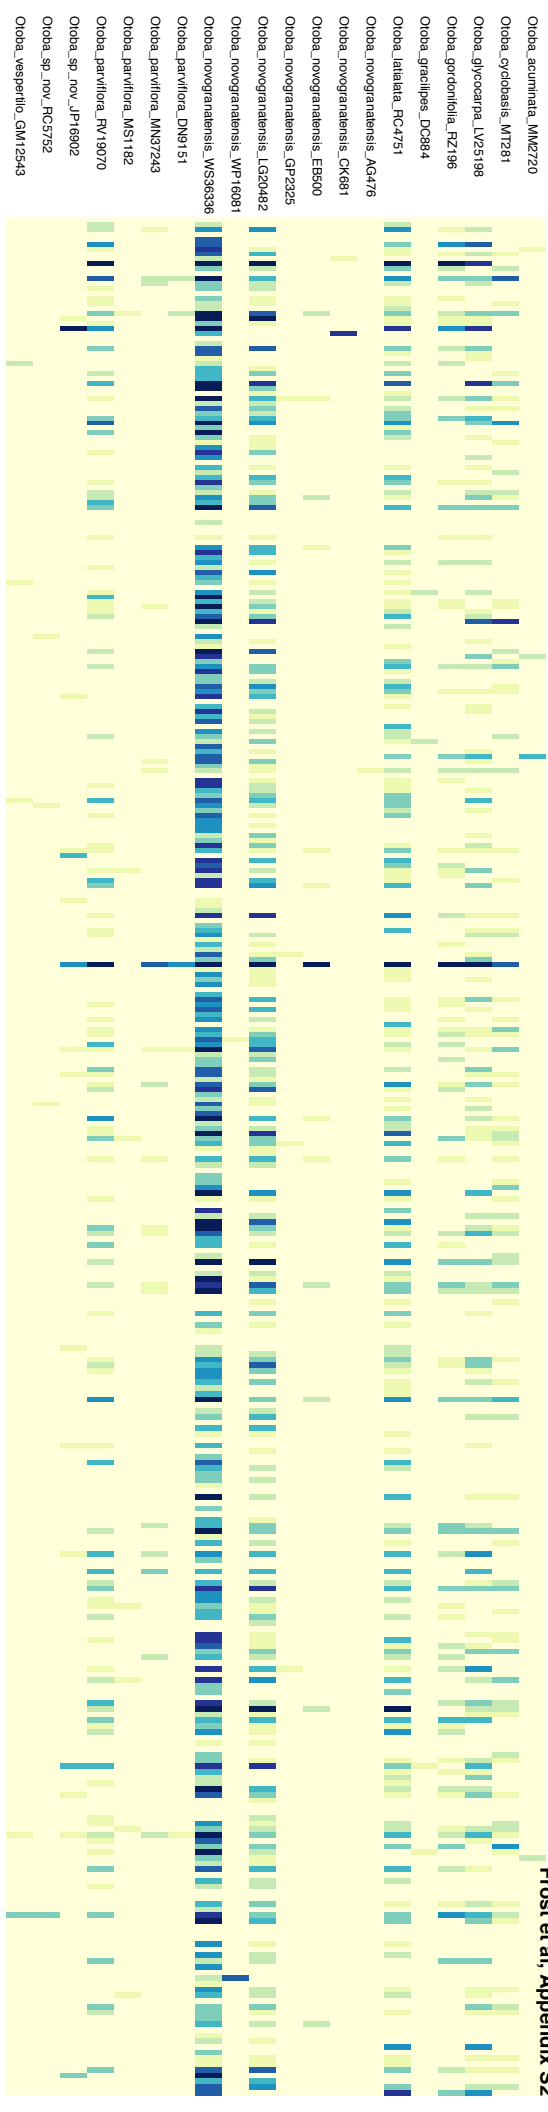

| Alignment name                 | No of taxa | Alignment Length | Total matrix cells | Undetermined Characters | Missing Percent | No. variable sites | Proportion variable sites | Parsimony Informative sites | Proportion parsimony informative | AT content | GC content | A | C    | G    | T    | K    | M | R | Y | S | W | B | V | H | D | X | N | O | ?     |   |
|--------------------------------|------------|------------------|--------------------|-------------------------|-----------------|--------------------|---------------------------|-----------------------------|----------------------------------|------------|------------|---|------|------|------|------|---|---|---|---|---|---|---|---|---|---|---|---|-------|---|
| 4471. supersonlig. cleanmatrix | 4          | 1778             | 7112               |                         | 4498            | 63.249%            | 0                         | 0.0000                      | 0                                | 0.0000     | 0          | 1 | 734  | 456  | 484  | 940  | 0 | 0 | 0 | 0 | 0 | 0 | 0 | 0 | 0 | 0 | 0 | 0 | 4498  | 0 |
| 4527. supersonlig. cleanmatrix | 5          | 1534             | 7770               |                         | 4881            | 62.519%            | 3                         | 0.00193                     | 0                                | 0.0000     | 0          | 1 | 776  | 478  | 780  | 855  | 0 | 0 | 0 | 0 | 0 | 0 | 0 | 0 | 0 | 0 | 0 | 0 | 4881  | 0 |
| 4724. supersonlig. cleanmatrix | 7          | 1588             | 10976              |                         | 6677            | 60.933%            | 15                        | 0.0057                      | 4                                | 0.0255     | 0          | 1 | 1259 | 877  | 996  | 1257 | 0 | 0 | 0 | 0 | 0 | 0 | 0 | 0 | 0 | 0 | 0 | 0 | 6677  | 0 |
| 4726. supersonlig. cleanmatrix | 6          | 1238             | 7548               |                         | 5441            | 72.089%            | 2                         | 0.00159                     | 0                                | 0.0079     | 0          | 1 | 545  | 343  | 481  | 738  | 0 | 0 | 0 | 0 | 0 | 0 | 0 | 0 | 0 | 0 | 0 | 0 | 5441  | 0 |
| 4802. supersonlig. cleanmatrix | 6          | 1735             | 10410              |                         | 6148            | 59.059%            | 15                        | 0.00865                     | 0                                | 0.0000     | 0          | 1 | 1140 | 667  | 997  | 1458 | 0 | 0 | 0 | 0 | 0 | 0 | 0 | 0 | 0 | 0 | 0 | 0 | 6148  | 0 |
| 4806. supersonlig. cleanmatrix | 6          | 834              | 4844               |                         | 2857            | 57.787%            | 1                         | 0.00121                     | 0                                | 0.00121    | 0          | 1 | 552  | 340  | 503  | 692  | 0 | 0 | 0 | 0 | 0 | 0 | 0 | 0 | 0 | 0 | 0 | 0 | 2857  | 0 |
| 4808. supersonlig. cleanmatrix | 6          | 1733             | 10398              |                         | 5856            | 56.319%            | 10                        | 0.0057                      | 1                                | 0.0058     | 0          | 1 | 1169 | 882  | 1190 | 1201 | 0 | 0 | 0 | 0 | 0 | 0 | 0 | 0 | 0 | 0 | 0 | 0 | 5856  | 0 |
| 4893. supersonlig. cleanmatrix | 4          | 1808             | 6432               |                         | 3902            | 60.659%            | 1                         | 0.0082                      | 0                                | 0.0000     | 0          | 1 | 686  | 407  | 513  | 924  | 0 | 0 | 0 | 0 | 0 | 0 | 0 | 0 | 0 | 0 | 0 | 0 | 3902  | 0 |
| 4842. supersonlig. cleanmatrix | 4          | 1007             | 4028               |                         | 1978            | 49.108%            | 5                         | 0.0000                      | 0                                | 0.0000     | 0          | 1 | 476  | 377  | 443  | 734  | 0 | 0 | 0 | 0 | 0 | 0 | 0 | 0 | 0 | 0 | 0 | 0 | 1978  | 0 |
| 4854. supersonlig. cleanmatrix | 7          | 1171             | 8197               |                         | 4820            | 56.382%            | 2                         | 0.0017                      | 0                                | 0.0000     | 0          | 1 | 906  | 551  | 1078 | 1042 | 0 | 0 | 0 | 0 | 0 | 0 | 0 | 0 | 0 | 0 | 0 | 0 | 4820  | 0 |
| 4898. supersonlig. cleanmatrix | 5          | 1098             | 5940               |                         | 2488            | 48.356%            | 4                         | 0.00597                     | 0                                | 0.0000     | 0          | 1 | 752  | 478  | 625  | 697  | 0 | 0 | 0 | 0 | 0 | 0 | 0 | 0 | 0 | 0 | 0 | 0 | 2488  | 0 |
| 4928. supersonlig. cleanmatrix | 8          | 3573             | 28534              |                         | 19303           | 68.481%            | 13                        | 0.00624                     | 1                                | 0.00268    | 0          | 1 | 2750 | 1584 | 2015 | 3222 | 0 | 0 | 0 | 0 | 0 | 0 | 0 | 0 | 0 | 0 | 0 | 0 | 19303 | 0 |
| 5032. supersonlig. cleanmatrix | 3          | 895              | 2415               |                         | 889             | 28.530%            | 5                         | 0.00821                     | 0                                | 0.0000     | 0          | 1 | 603  | 302  | 415  | 406  | 0 | 0 | 0 | 0 | 0 | 0 | 0 | 0 | 0 | 0 | 0 | 0 | 889   | 0 |
| 5116. supersonlig. cleanmatrix | 5          | 982              | 4810               |                         | 2567            | 53.386%            | 12                        | 0.01547                     | 1                                | 0.00104    | 0          | 1 | 562  | 381  | 501  | 789  | 0 | 0 | 0 | 0 | 0 | 0 | 0 | 0 | 0 | 0 | 0 | 0 | 2567  | 0 |
| 5123. supersonlig. cleanmatrix | 6          | 947              | 5832               |                         | 3588            | 62.739%            | 2                         | 0.00211                     | 1                                | 0.00108    | 0          | 1 | 587  | 416  | 452  | 679  | 0 | 0 | 0 | 0 | 0 | 0 | 0 | 0 | 0 | 0 | 0 | 0 | 3588  | 0 |
| 5131. supersonlig. cleanmatrix | 4          | 784              | 3136               |                         | 1553            | 49.841%            | 0                         | 0.00128                     | 0                                | 0.0000     | 0          | 1 | 443  | 274  | 392  | 484  | 0 | 0 | 0 | 0 | 0 | 0 | 0 | 0 | 0 | 0 | 0 | 0 | 1553  | 0 |
| 5182. supersonlig. cleanmatrix | 7          | 1324             | 8288               |                         | 6124            | 66.077%            | 6                         | 0.00453                     | 0                                | 0.0000     | 0          | 1 | 878  | 548  | 818  | 900  | 0 | 0 | 0 | 0 | 0 | 0 | 0 | 0 | 0 | 0 | 0 | 0 | 6124  | 0 |
| 5183. supersonlig. cleanmatrix | 7          | 1383             | 9471               |                         | 5628            | 59.402%            | 25                        | 0.01848                     | 0                                | 0.0000     | 0          | 1 | 1145 | 631  | 837  | 1232 | 0 | 0 | 0 | 0 | 0 | 0 | 0 | 0 | 0 | 0 | 0 | 0 | 5628  | 0 |
| 5184. supersonlig. cleanmatrix | 5          | 1070             | 5350               |                         | 2878            | 50.056%            | 5                         | 0.00467                     | 0                                | 0.0000     | 0          | 1 | 724  | 415  | 625  | 908  | 0 | 0 | 0 | 0 | 0 | 0 | 0 | 0 | 0 | 0 | 0 | 0 | 2878  | 0 |
| 5206. supersonlig. cleanmatrix | 5          | 740              | 3700               |                         | 2094            | 56.324%            | 0                         | 0.0000                      | 0                                | 0.0000     | 0          | 1 | 511  | 283  | 372  | 470  | 0 | 0 | 0 | 0 | 0 | 0 | 0 | 0 | 0 | 0 | 0 | 0 | 2094  | 0 |
| 5257. supersonlig. cleanmatrix | 6          | 507              | 3042               |                         | 1112            | 36.559%            | 2                         | 0.00594                     | 0                                | 0.0000     | 0          | 1 | 604  | 378  | 371  | 577  | 0 | 0 | 0 | 0 | 0 | 0 | 0 | 0 | 0 | 0 | 0 | 0 | 1112  | 0 |
| 5273. supersonlig. cleanmatrix | 5          | 1112             | 5580               |                         | 3528            | 63.453%            | 4                         | 0.00580                     | 1                                | 0.00390    | 0          | 1 | 587  | 386  | 489  | 580  | 0 | 0 | 0 | 0 | 0 | 0 | 0 | 0 | 0 | 0 | 0 | 0 | 3528  | 0 |
| 5280. supersonlig. cleanmatrix | 6          | 1180             | 6980               |                         | 3820            | 54.883%            | 7                         | 0.00603                     | 0                                | 0.0000     | 0          | 1 | 846  | 580  | 704  | 1010 | 0 | 0 | 0 | 0 | 0 | 0 | 0 | 0 | 0 | 0 | 0 | 0 | 3820  | 0 |
| 5299. supersonlig. cleanmatrix | 7          | 1387             | 8709               |                         | 5970            | 61.489%            | 14                        | 0.01009                     | 12                               | 0.0885     | 0          | 1 | 876  | 678  | 740  | 1445 | 0 | 0 | 0 | 0 | 0 | 0 | 0 | 0 | 0 | 0 | 0 | 0 | 5970  | 0 |
| 5326. supersonlig. cleanmatrix | 4          | 1593             | 8012               |                         | 2954            | 48.301%            | 4                         | 0.00266                     | 0                                | 0.0000     | 0          | 1 | 787  | 583  | 832  | 886  | 0 | 0 | 0 | 0 | 0 | 0 | 0 | 0 | 0 | 0 | 0 | 0 | 2954  | 0 |
| 5333. supersonlig. cleanmatrix | 6          | 1971             | 11826              |                         | 7564            | 63.961%            | 8                         | 0.00406                     | 0                                | 0.0000     | 0          | 1 | 1170 | 735  | 1119 | 1218 | 0 | 0 | 0 | 0 | 0 | 0 | 0 | 0 | 0 | 0 | 0 | 0 | 7564  | 0 |
| 5335. supersonlig. cleanmatrix | 5          | 1819             | 9095               |                         | 6323            | 68.822%            | 4                         | 0.00200                     | 0                                | 0.0000     | 0          | 1 | 781  | 532  | 581  | 878  | 0 | 0 | 0 | 0 | 0 | 0 | 0 | 0 | 0 | 0 | 0 | 0 | 6323  | 0 |
| 5398. supersonlig. cleanmatrix | 5          | 1316             | 6580               |                         | 3859            | 58.647%            | 6                         | 0.00456                     | 0                                | 0.0000     | 0          | 1 | 707  | 529  | 519  | 966  | 0 | 0 | 0 | 0 | 0 | 0 | 0 | 0 | 0 | 0 | 0 | 0 | 3859  | 0 |
| 5404. supersonlig. cleanmatrix | 5          | 1736             | 8780               |                         | 5832            | 66.424%            | 7                         | 0.00589                     | 0                                | 0.0000     | 0          | 1 | 782  | 637  | 608  | 921  | 0 | 0 | 0 | 0 | 0 | 0 | 0 | 0 | 0 | 0 | 0 | 0 | 5832  | 0 |
| 5406. supersonlig. cleanmatrix | 7          | 2486             | 17282              |                         | 12704           | 73.595%            | 12                        | 0.00487                     | 0                                | 0.0000     | 0          | 1 | 1158 | 790  | 983  | 1617 | 0 | 0 | 0 | 0 | 0 | 0 | 0 | 0 | 0 | 0 | 0 | 0 | 12704 | 0 |
| 5421. supersonlig. cleanmatrix | 5          | 1125             | 5625               |                         | 3441            | 61.173%            | 5                         | 0.00444                     | 0                                | 0.0000     | 0          | 1 | 578  | 327  | 525  | 754  | 0 | 0 | 0 | 0 | 0 | 0 | 0 | 0 | 0 | 0 | 0 | 0 | 3441  | 0 |
| 5426. supersonlig. cleanmatrix | 6          | 2303             | 13818              |                         | 7588            | 54.014%            | 24                        | 0.01042                     | 0                                | 0.0000     | 0          | 1 | 1682 | 124  | 1458 | 1886 | 0 | 0 | 0 | 0 | 0 | 0 | 0 | 0 | 0 | 0 | 0 | 0 | 7588  | 0 |
| 5430. supersonlig. cleanmatrix | 4          | 827              | 3308               |                         | 1691            | 51.118%            | 2                         | 0.00242                     | 0                                | 0.0000     | 0          | 1 | 426  | 182  | 347  | 632  | 0 | 0 | 0 | 0 | 0 | 0 | 0 | 0 | 0 | 0 | 0 | 0 | 1691  | 0 |
| 5434. supersonlig. cleanmatrix | 4          | 444              | 1776               |                         | 517             | 23.110%            | 0                         | 0.0000                      | 0                                | 0.0000     | 0          | 1 | 287  | 280  | 352  | 340  | 0 | 0 | 0 | 0 | 0 | 0 | 0 | 0 | 0 | 0 | 0 | 0 | 517   | 0 |
| 5448. supersonlig. cleanmatrix | 8          | 2012             | 10696              |                         | 11046           | 68.820%            | 88                        | 0.00199                     | 4                                | 0.00199    | 0          | 1 | 1313 | 889  | 1235 | 1804 | 0 | 0 | 0 | 0 | 0 | 0 | 0 | 0 | 0 | 0 | 0 | 0 | 11046 | 0 |
| 5454. supersonlig. cleanmatrix | 4          | 1557             | 6238               |                         | 3098            | 48.743%            | 12                        | 0.00771                     | 0                                | 0.0000     | 0          | 1 | 807  | 524  | 684  | 1115 | 0 | 0 | 0 | 0 | 0 | 0 | 0 | 0 | 0 | 0 | 0 | 0 | 3098  | 0 |
| 5463. supersonlig. cleanmatrix | 6          | 846              | 5076               |                         | 2623            | 51.675%            | 4                         | 0.00473                     | 0                                | 0.0000     | 0          | 1 | 701  | 395  | 533  | 824  | 0 | 0 | 0 | 0 | 0 | 0 | 0 | 0 | 0 | 0 | 0 | 0 | 2623  | 0 |
| 5469. supersonlig. cleanmatrix | 3          | 400              | 1200               |                         | 420             | 35.000%            | 4                         | 0.01000                     | 0                                | 0.0000     | 0          | 1 | 164  | 149  | 178  | 289  | 0 | 0 | 0 | 0 | 0 | 0 | 0 | 0 | 0 | 0 | 0 | 0 | 420   | 0 |
| 5502. supersonlig. cleanmatrix | 6          | 1900             | 11400              |                         | 7114            | 62.404%            | 8                         | 0.00421                     | 0                                | 0.0000     | 0          | 1 | 1138 | 756  | 827  | 1475 | 0 | 0 | 0 | 0 | 0 | 0 | 0 | 0 | 0 | 0 | 0 | 0 | 7114  | 0 |
| 5528. supersonlig. cleanmatrix | 5          | 2014             | 10070              |                         | 6872            | 68.242%            | 0                         | 0.0000                      | 0                                | 0.0000     | 0          | 1 | 828  | 573  | 670  | 1127 | 0 | 0 | 0 | 0 | 0 | 0 | 0 | 0 | 0 | 0 | 0 | 0 | 6872  | 0 |
| 5554. supersonlig. cleanmatrix | 4          | 1638             | 6532               |                         | 3794            | 57.906%            | 1                         | 0.00661                     | 0                                | 0.0000     | 0          | 1 | 837  | 432  | 655  | 834  | 0 | 0 | 0 | 0 | 0 | 0 | 0 | 0 | 0 | 0 | 0 | 0 | 3794  | 0 |
| 5578. supersonlig. cleanmatrix | 4          | 580              | 2240               |                         | 946             | 42.232%            | 4                         | 0.00714                     | 0                                | 0.0000     | 0          | 1 | 341  | 235  | 316  | 402  | 0 | 0 | 0 | 0 | 0 | 0 | 0 | 0 | 0 | 0 | 0 | 0 | 946   | 0 |
| 5594. supersonlig. cleanmatrix | 6          | 792              | 4732               |                         | 1738            | 38.995%            | 11                        | 0.01589                     | 1                                | 0.00126    | 0          | 1 | 848  | 541  | 843  | 782  | 0 | 0 | 0 | 0 | 0 | 0 | 0 | 0 | 0 | 0 | 0 | 0 | 1738  | 0 |
| 5599. supersonlig. cleanmatrix | 6          | 730              | 3850               |                         | 1895            | 51.918%            | 2                         | 0.00274                     | 0                                | 0.0000     | 0          | 1 | 419  | 306  | 315  | 715  | 0 | 0 | 0 | 0 | 0 | 0 | 0 | 0 | 0 | 0 | 0 | 0 | 1895  | 0 |
| 5614. supersonlig. cleanmatrix | 5          | 3819             | 18090              |                         | 10069           | 58.419%            | 11                        | 0.00694                     | 0                                | 0.0000     | 0          | 1 | 2042 | 1349 | 1751 | 2380 | 0 | 0 | 0 | 0 | 0 | 0 | 0 | 0 | 0 | 0 | 0 | 0 | 10069 | 0 |
| 5639. supersonlig. cleanmatrix | 4          | 740              | 2980               |                         | 1472            | 48.330%            | 4                         | 0.00541                     | 0                                | 0.0000     | 0          | 1 | 411  | 285  | 344  | 488  | 0 | 0 | 0 | 0 | 0 | 0 | 0 | 0 | 0 | 0 | 0 | 0 | 1472  | 0 |
| 5644. supersonlig. cleanmatrix | 3          | 890              | 2870               |                         | 1278            | 47.865%            | 2                         | 0.00225                     | 0                                | 0.0000     | 0          | 1 | 356  | 236  | 285  | 485  | 0 | 0 | 0 | 0 | 0 | 0 | 0 | 0 | 0 | 0 | 0 | 0 | 1278  | 0 |
| 5648. supersonlig. cleanmatrix | 6          | 1679             | 10074              |                         | 6212            | 61.564%            | 11                        | 0.00525                     | 2                                | 0.01119    | 0          | 1 | 1024 | 590  | 848  | 1440 | 0 | 0 | 0 | 0 | 0 | 0 | 0 | 0 | 0 | 0 | 0 | 0 | 6212  | 0 |
| 5699. supersonlig. cleanmatrix | 6          | 1387             | 8332               |                         | 5438            | 64.553%            | 6                         | 0.00429                     | 0                                | 0.00143    | 0          | 1 | 724  | 543  | 597  | 1072 | 0 | 0 | 0 | 0 | 0 | 0 | 0 | 0 | 0 | 0 | 0 | 0 | 5438  | 0 |
| 5702. supersonlig. cleanmatrix | 7          | 832              | 3824               |                         | 3032            | 52.404%            | 7                         | 0.00641                     | 1                                | 0.00120    | 0          | 1 | 722  | 535  | 575  | 940  | 0 | 0 | 0 | 0 | 0 | 0 | 0 | 0 | 0 | 0 | 0 | 0 | 3032  | 0 |
| 5716. supersonlig. cleanmatrix | 4          | 1194             | 4776               |                         | 2887            | 60.448%            | 7                         | 0.00887                     | 0                                | 0.0000     | 0          | 1 | 568  | 319  | 413  | 589  | 0 | 0 | 0 | 0 | 0 | 0 | 0 | 0 | 0 | 0 | 0 | 0 | 2887  | 0 |
| 5721. supersonlig. cleanmatrix | 6          | 1011             |                    |                         |                 |                    |                           |                             |                                  |            |            |   |      |      |      |      |   |   |   |   |   |   |   |   |   |   |   |   |       |   |





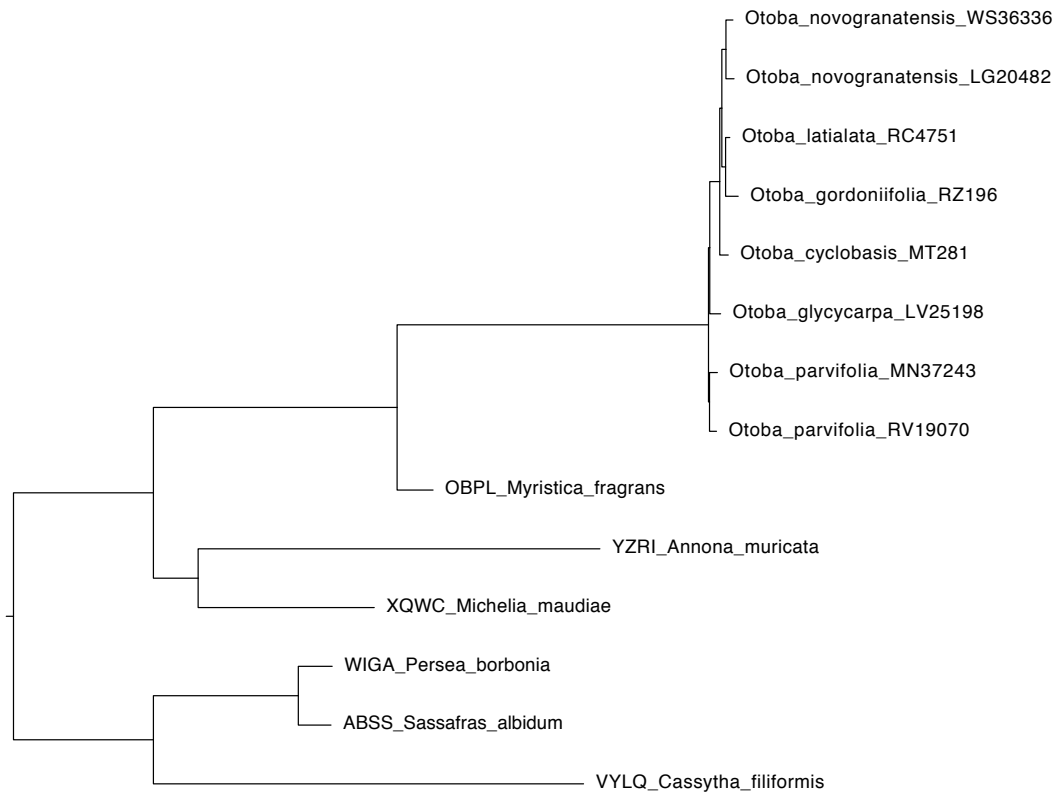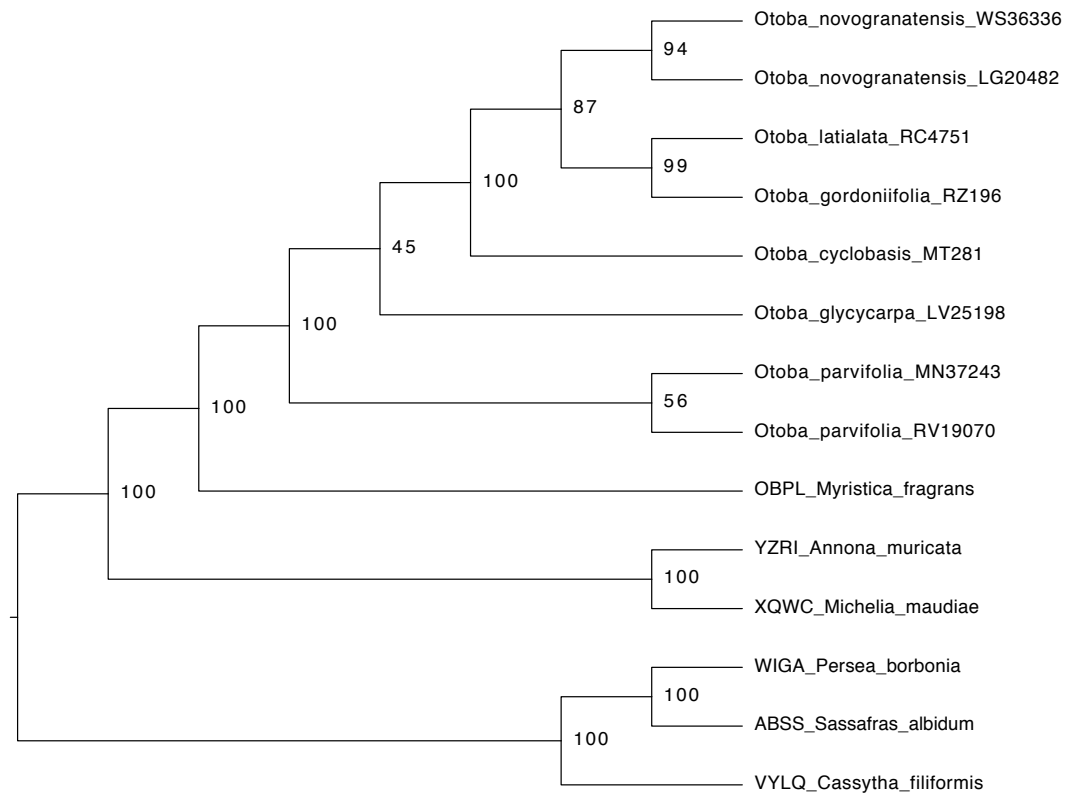



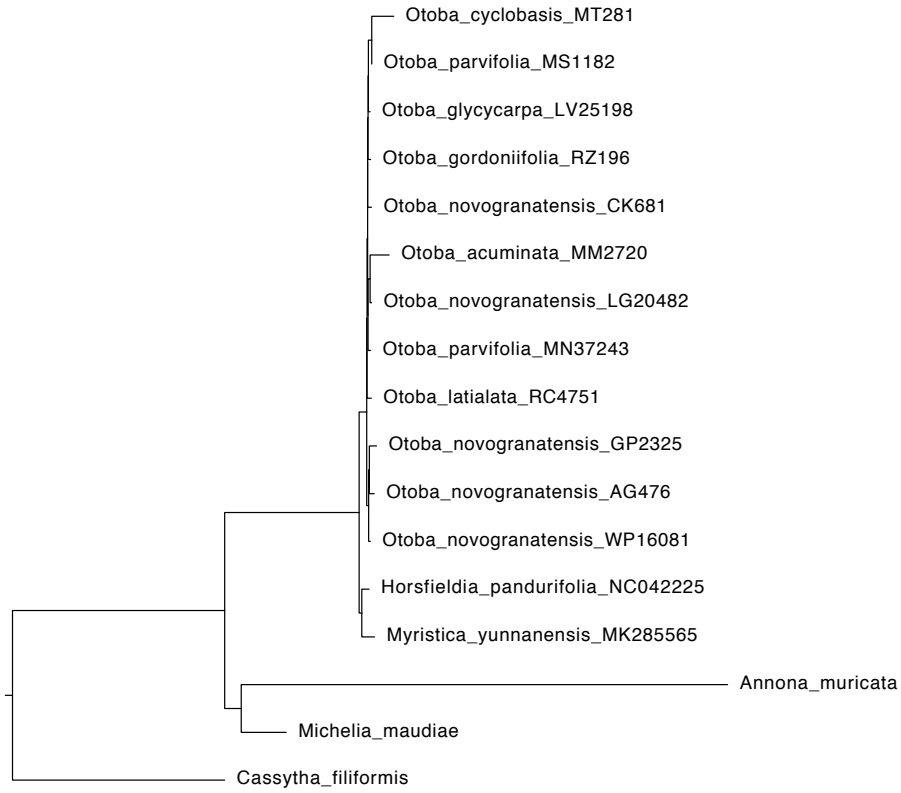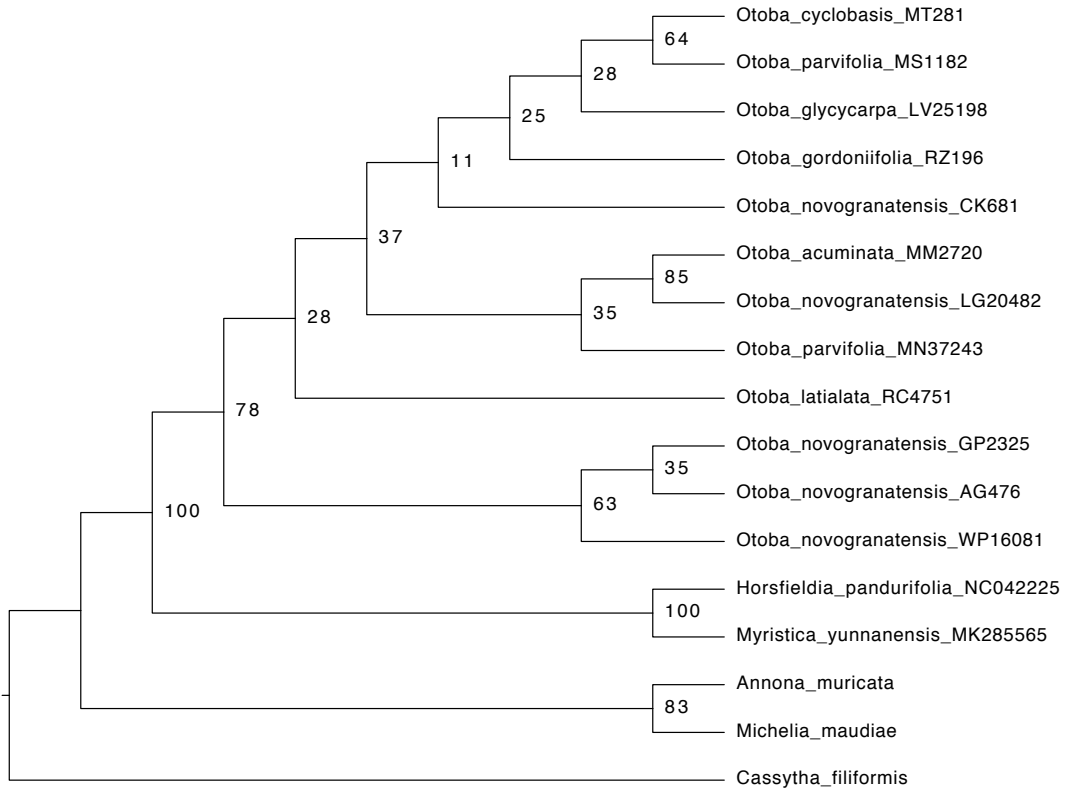

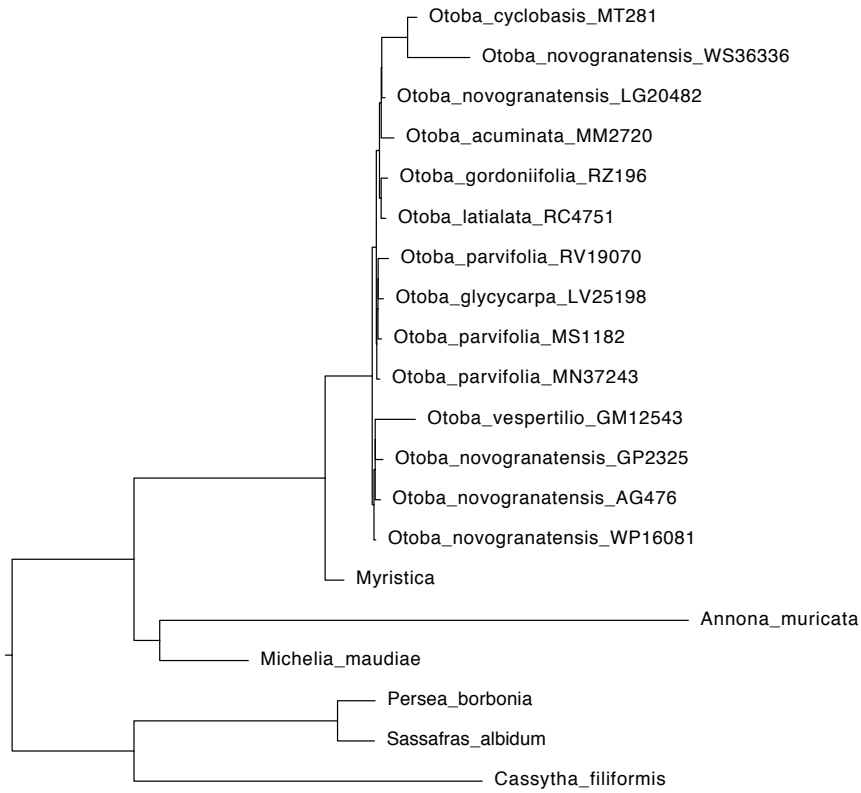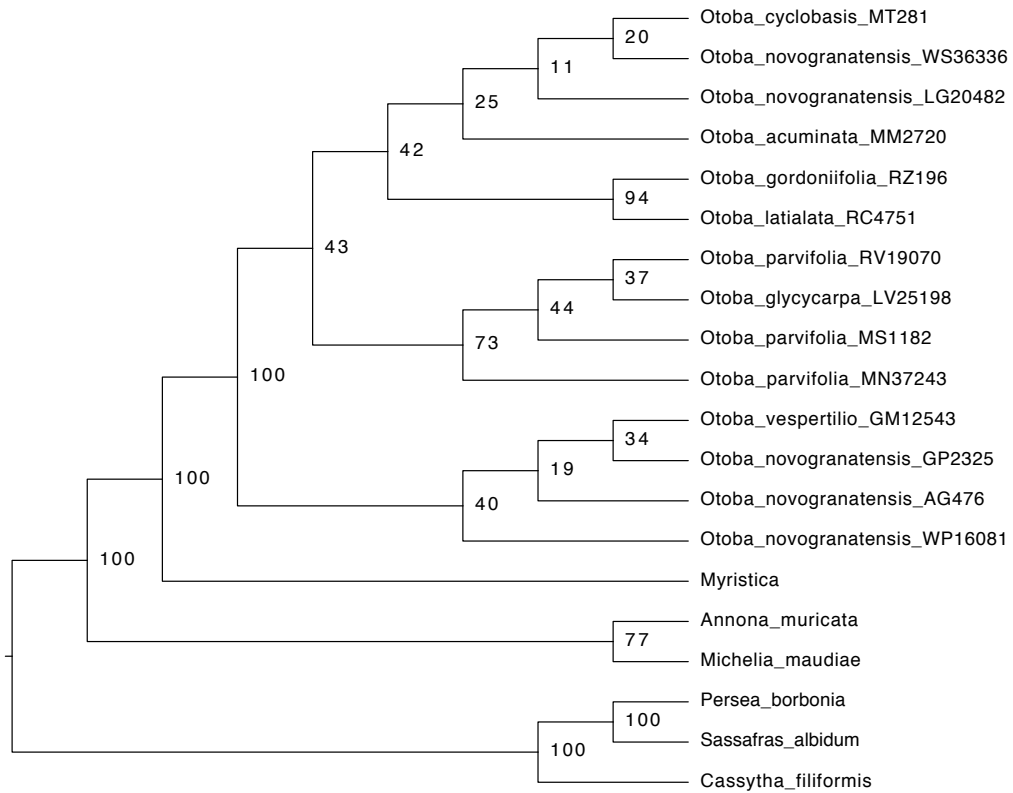

# Frost et al, Appendix S7

Magallón et al. (2015) UCLN minimum

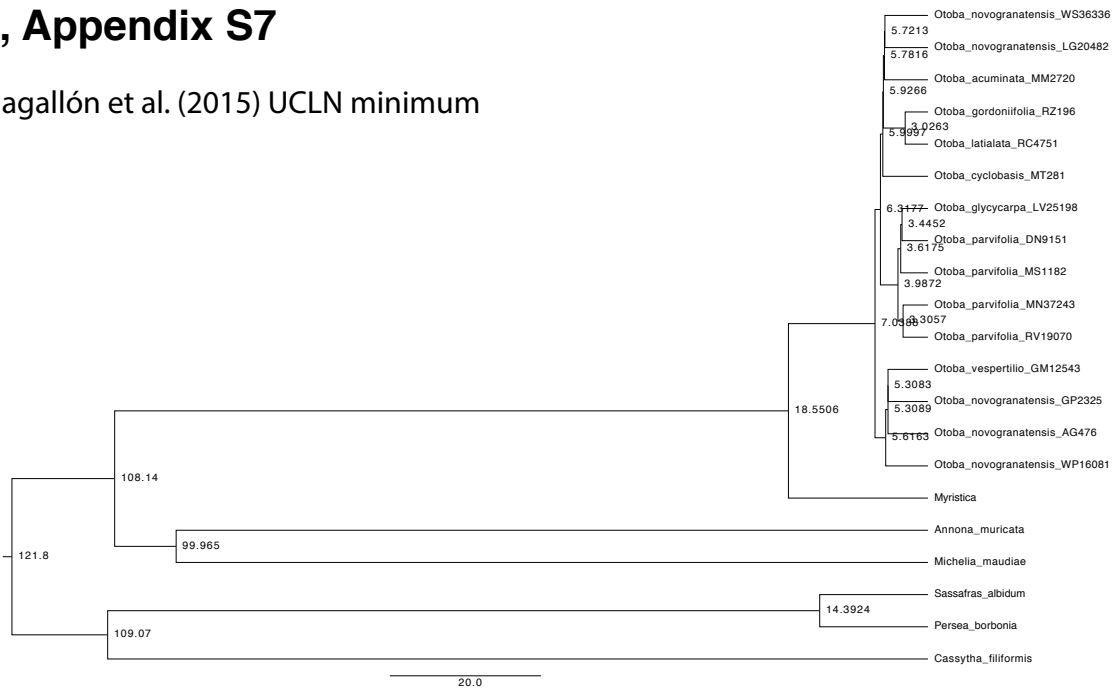

Magallón et al. (2015) UCLN median

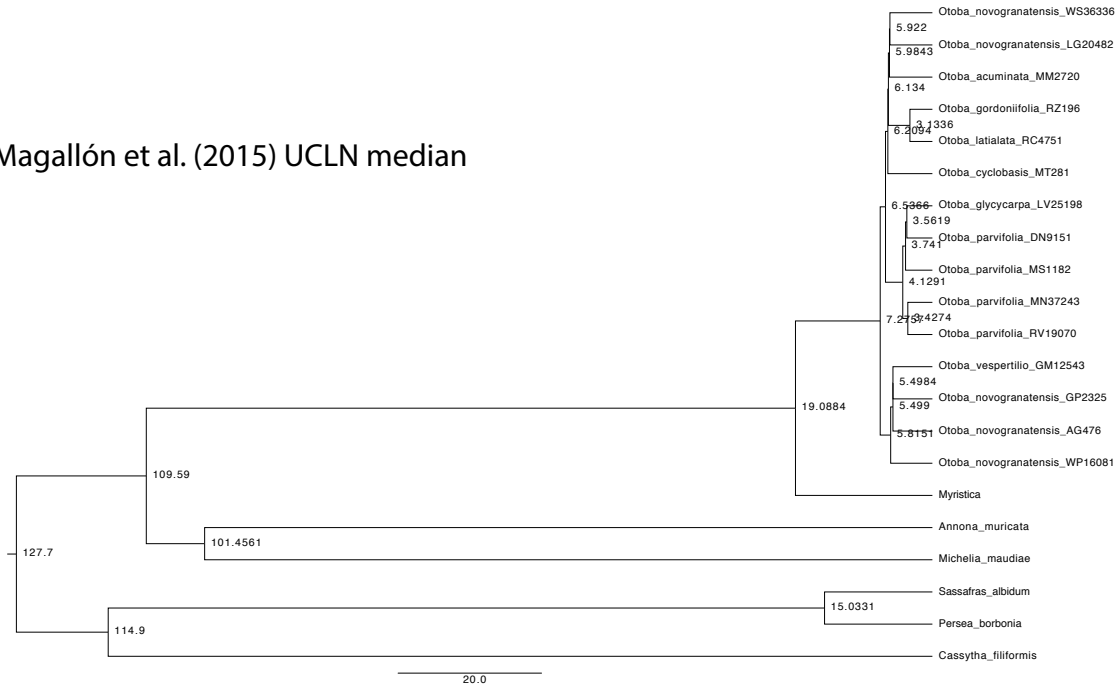

Magallón et al. (2015) UCLN maximum

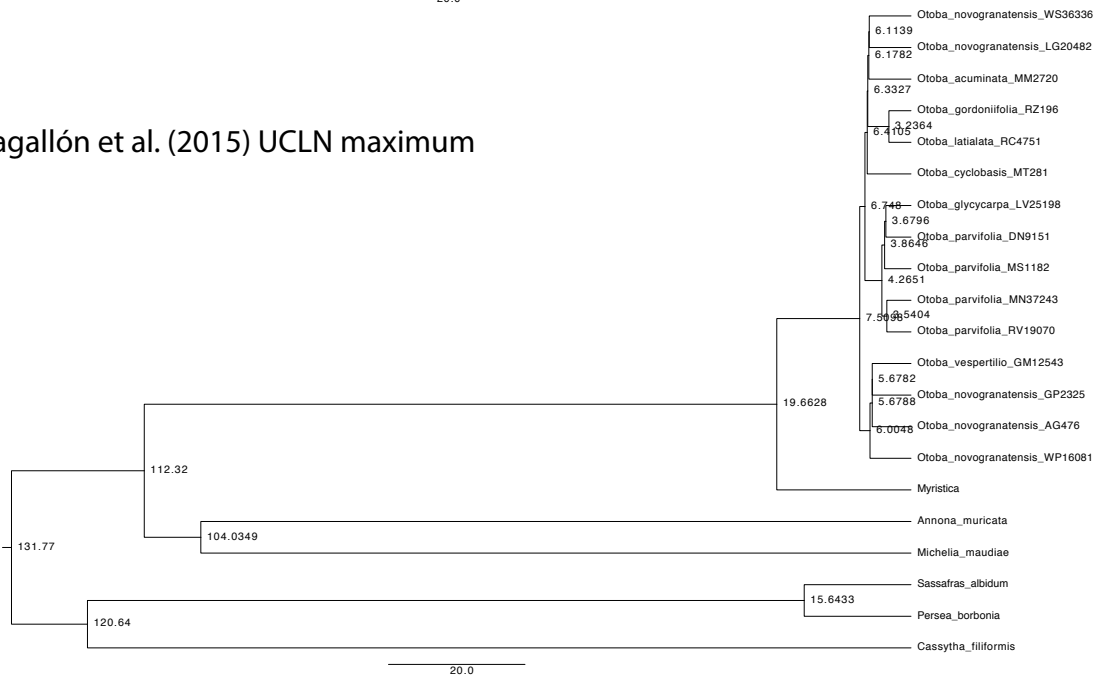

# Frost et al, Appendix S8

Massoni et al. (2015) UCLN minimum

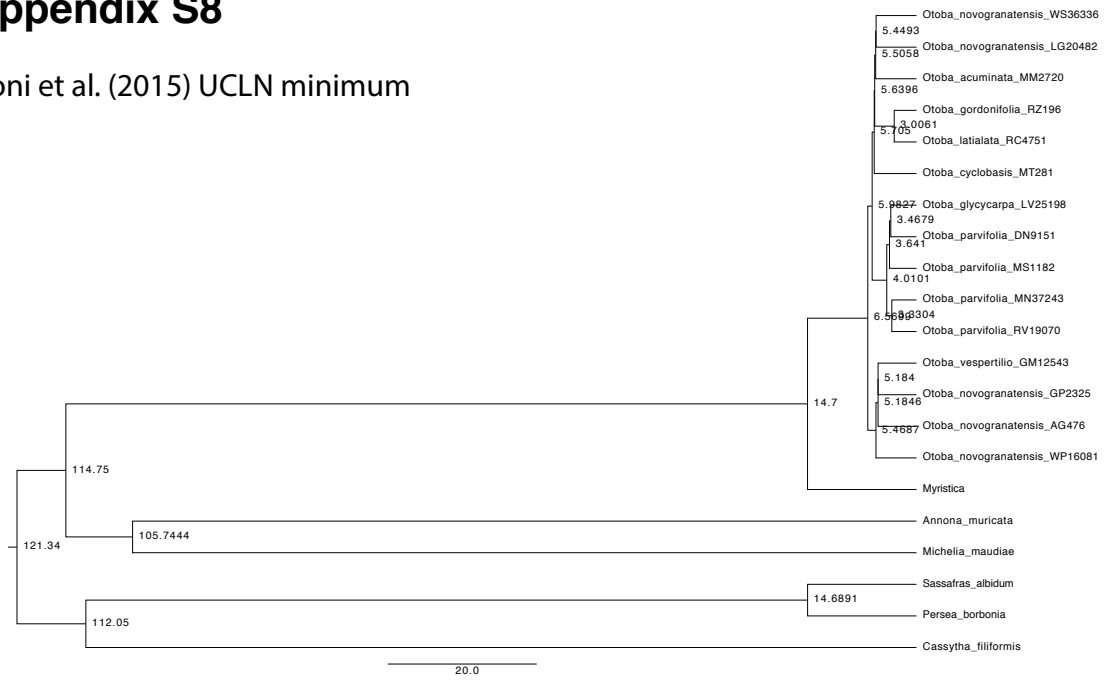

Massoni et al. (2015) UCLN mean

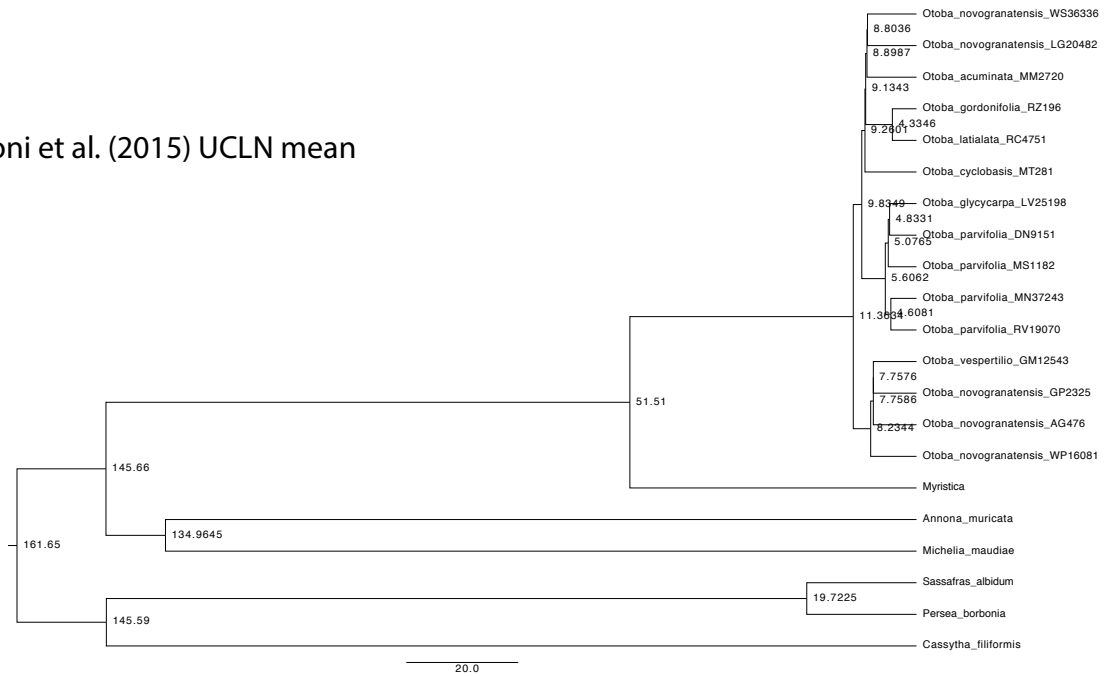

Massoni et al. (2015) UCLN maximum

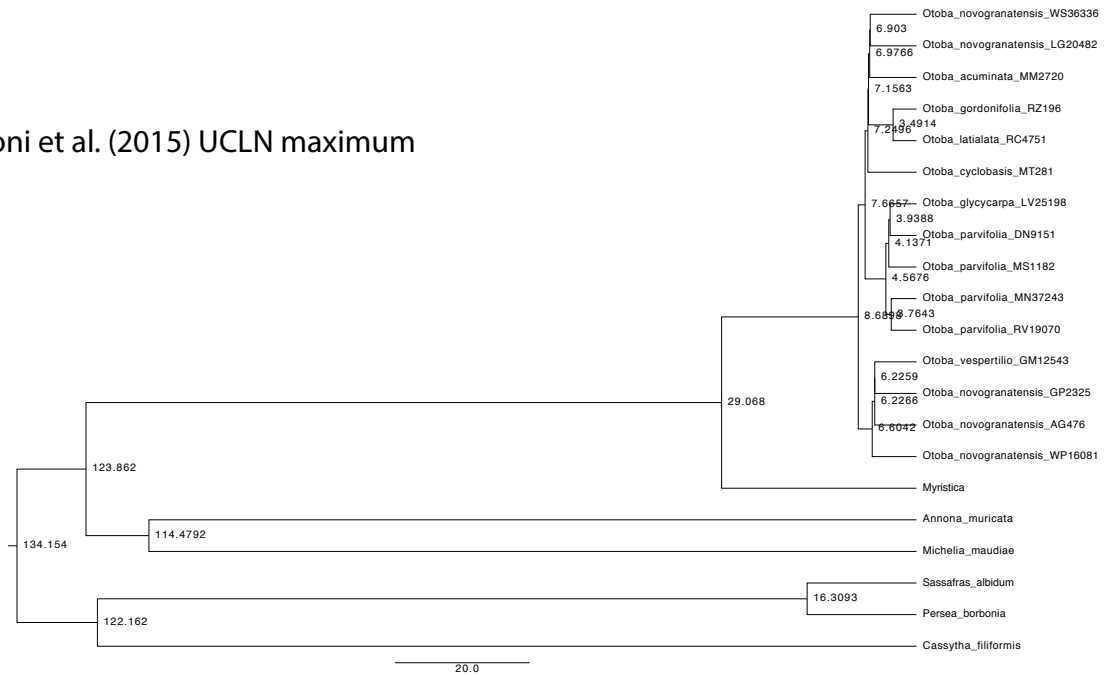

# Frost et al, Appendix S9

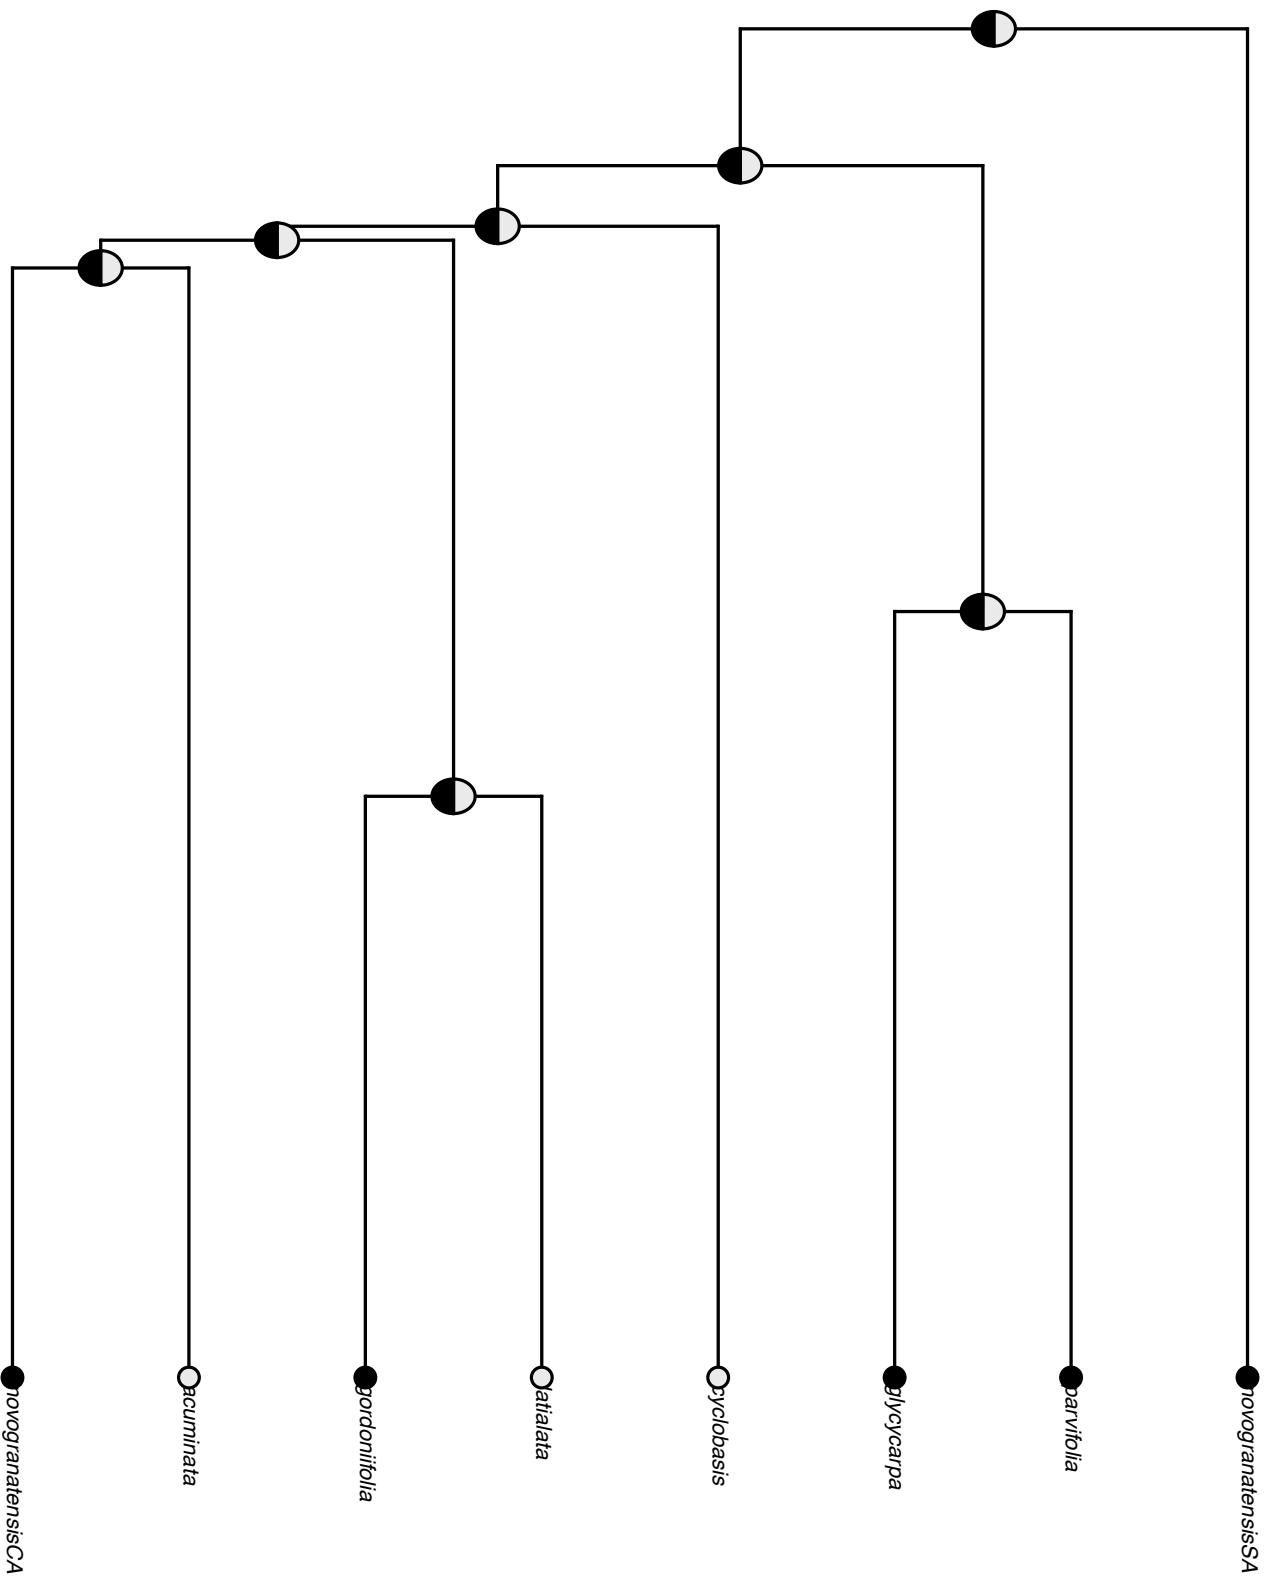

anther shape, attachment:  
globose, dorsally  
reniform, basally

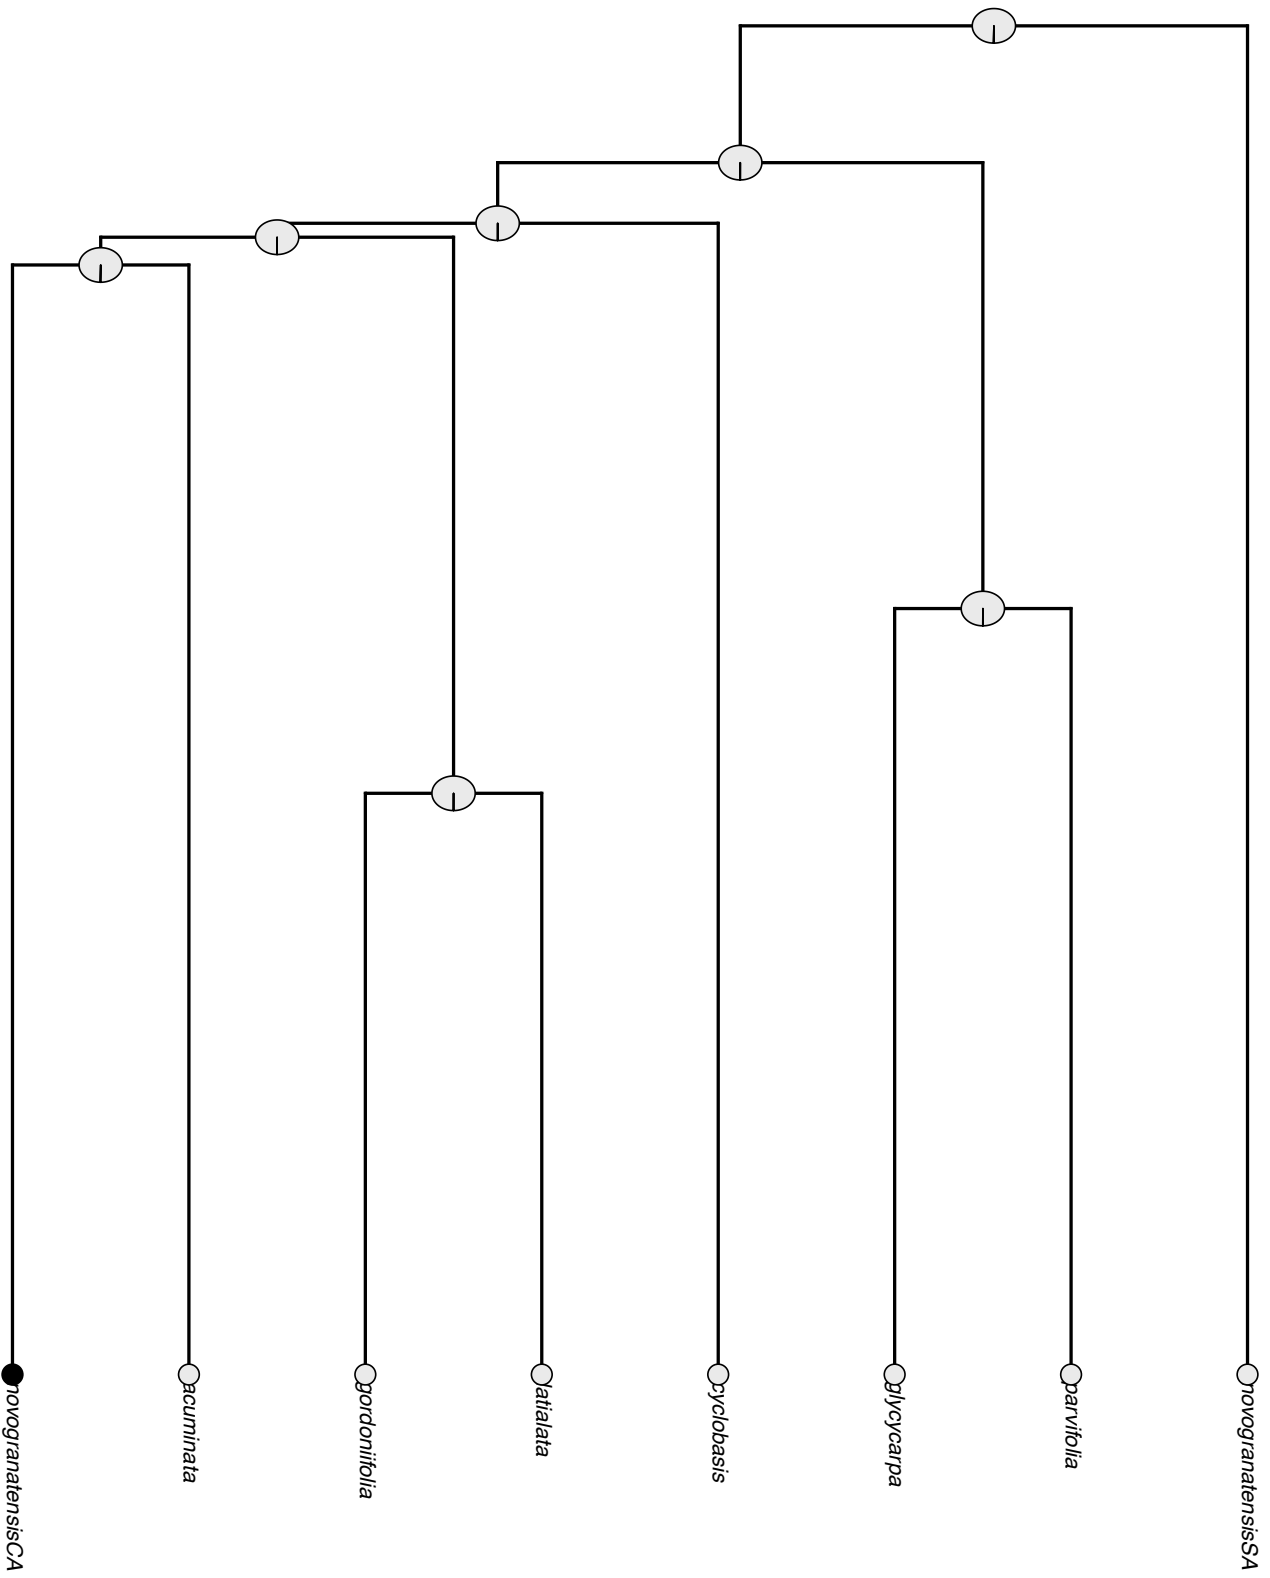

ari color:  
white to yellow  
orange to red

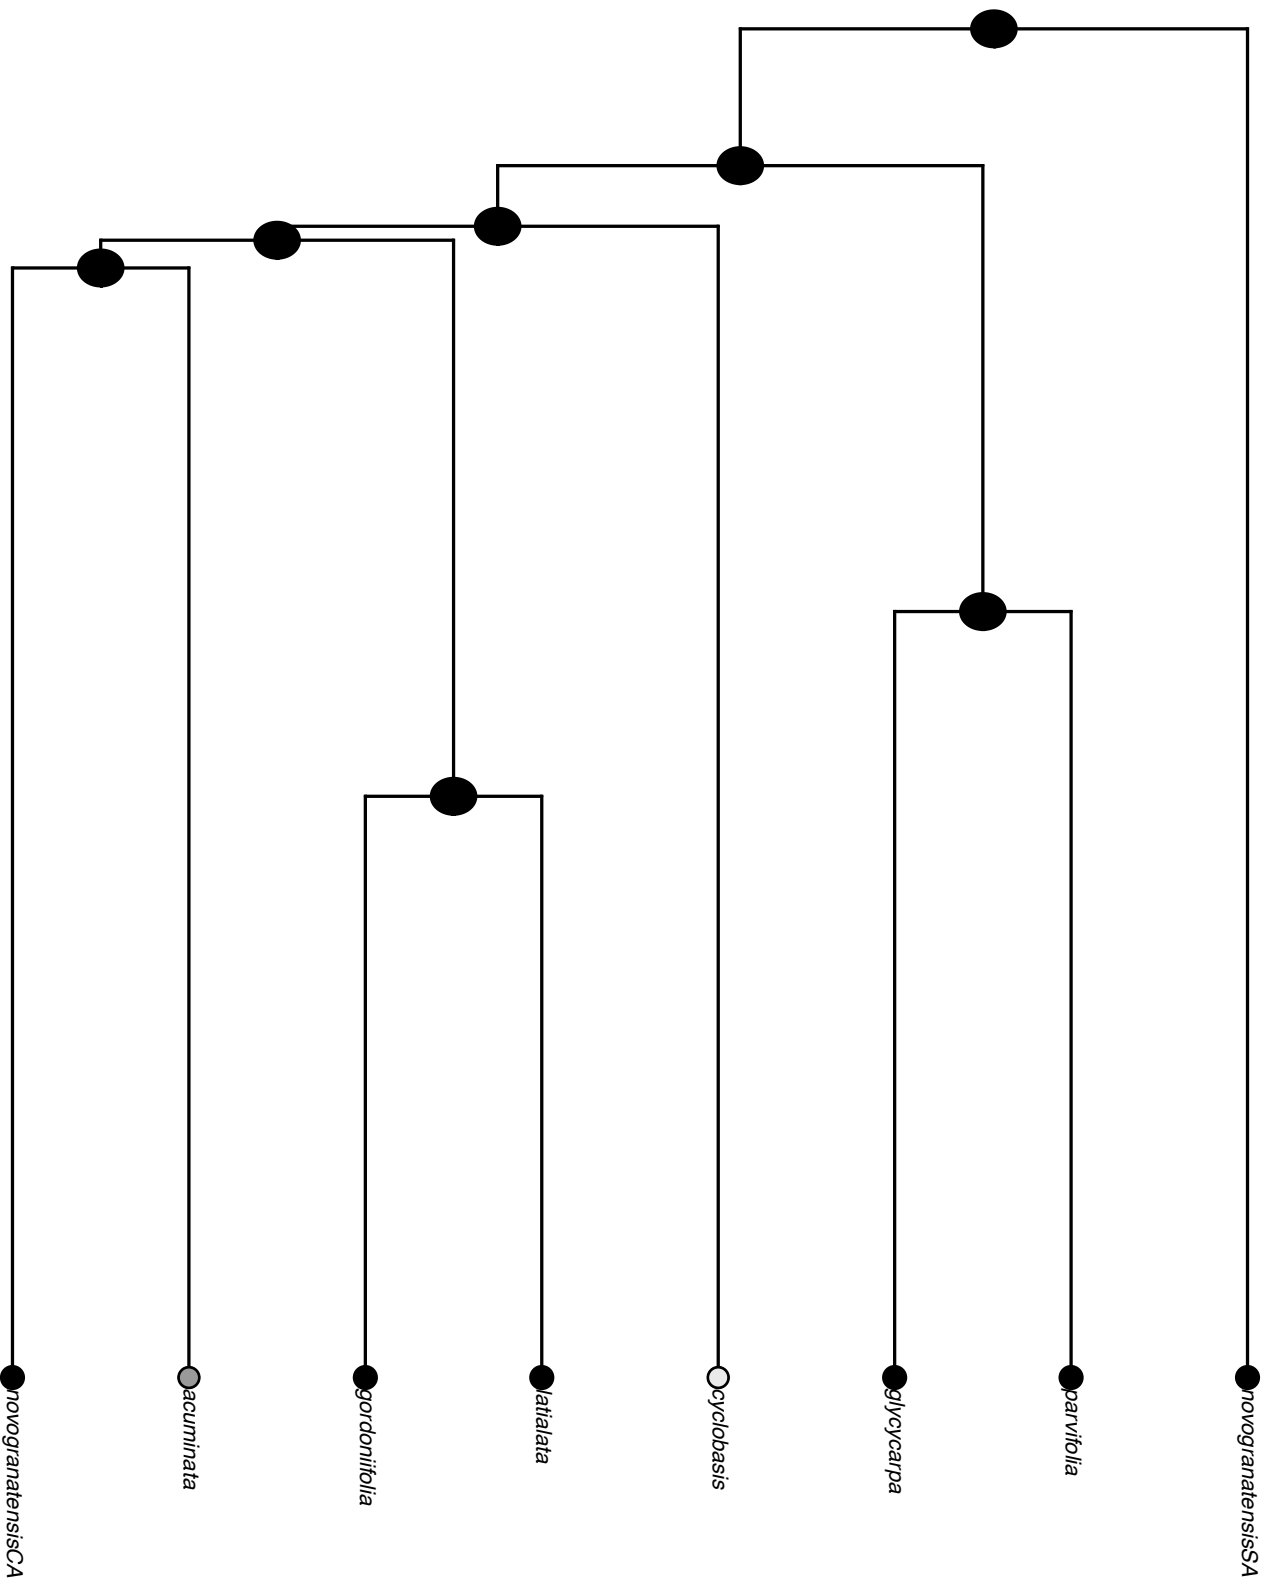

extrastaminal disc:  
absent  
rarely present  
present

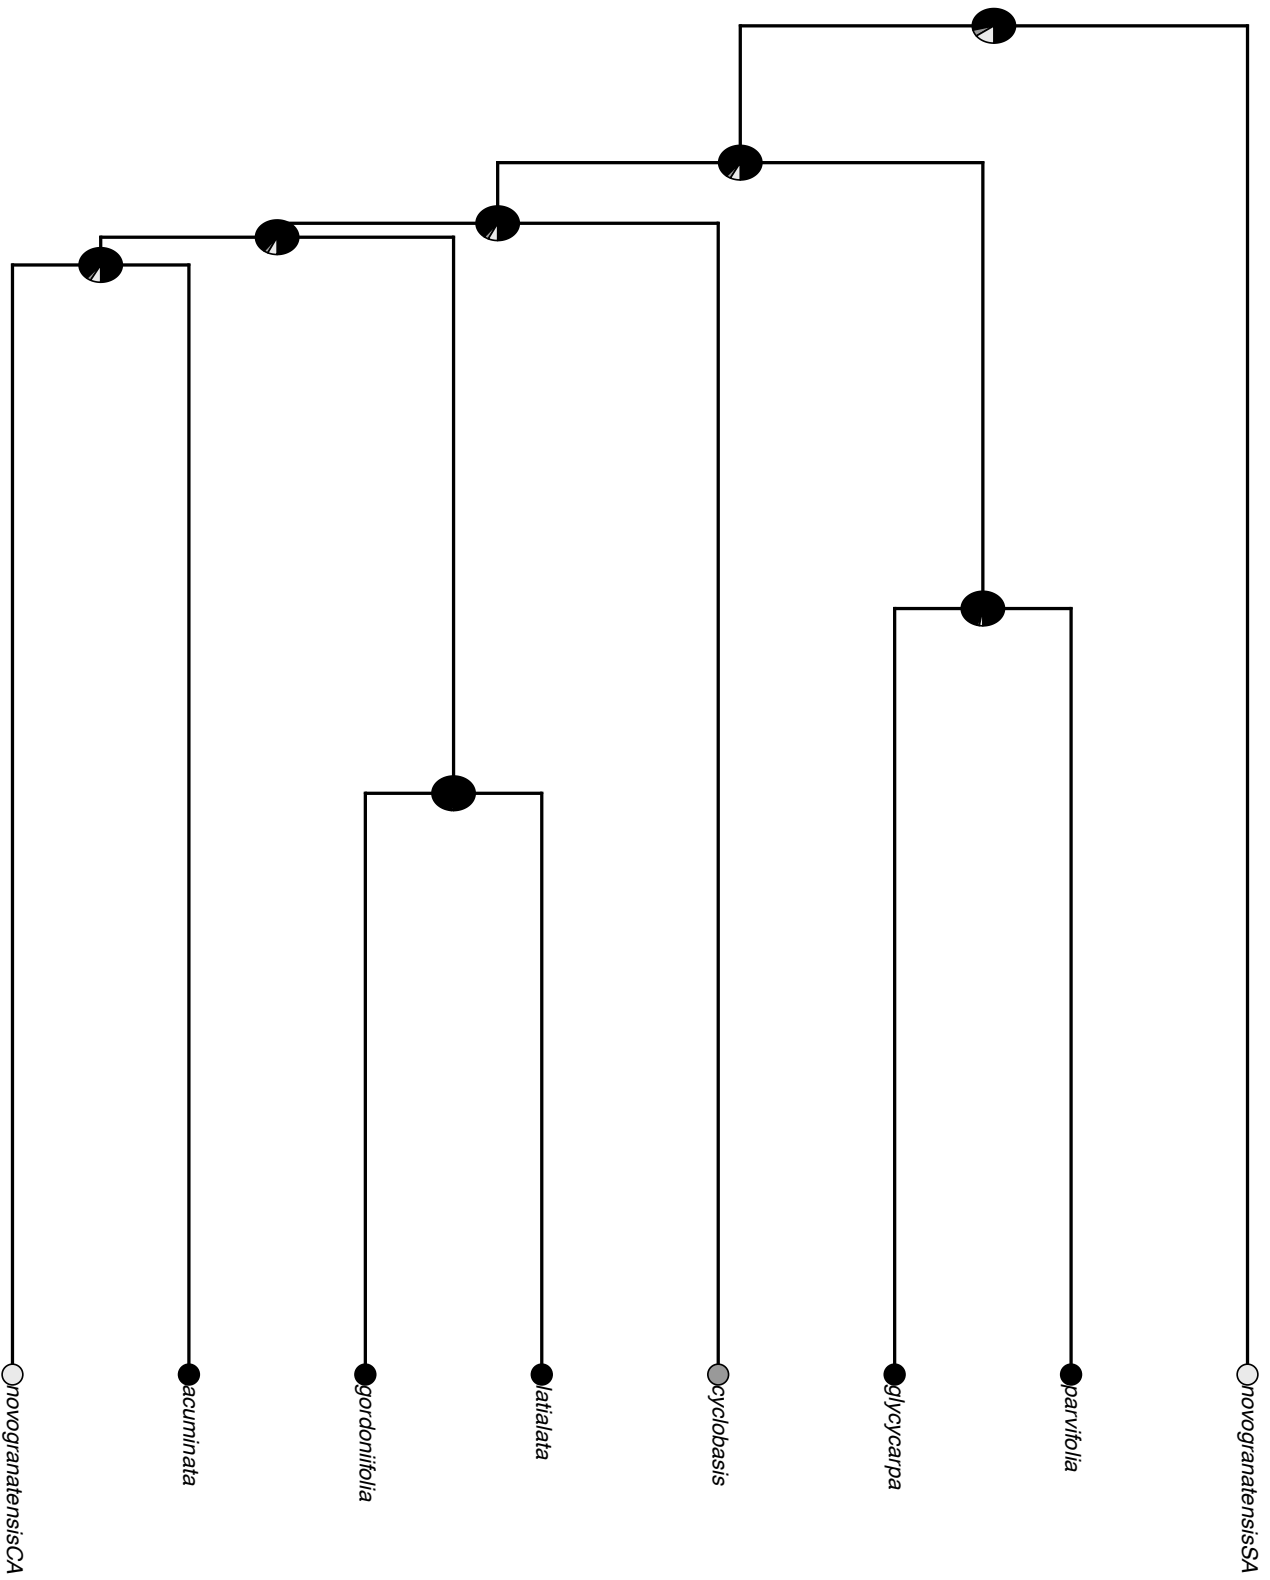

filament column shape:  
□ not applicable  
▒ with parallel sides  
■ bottle-shaped



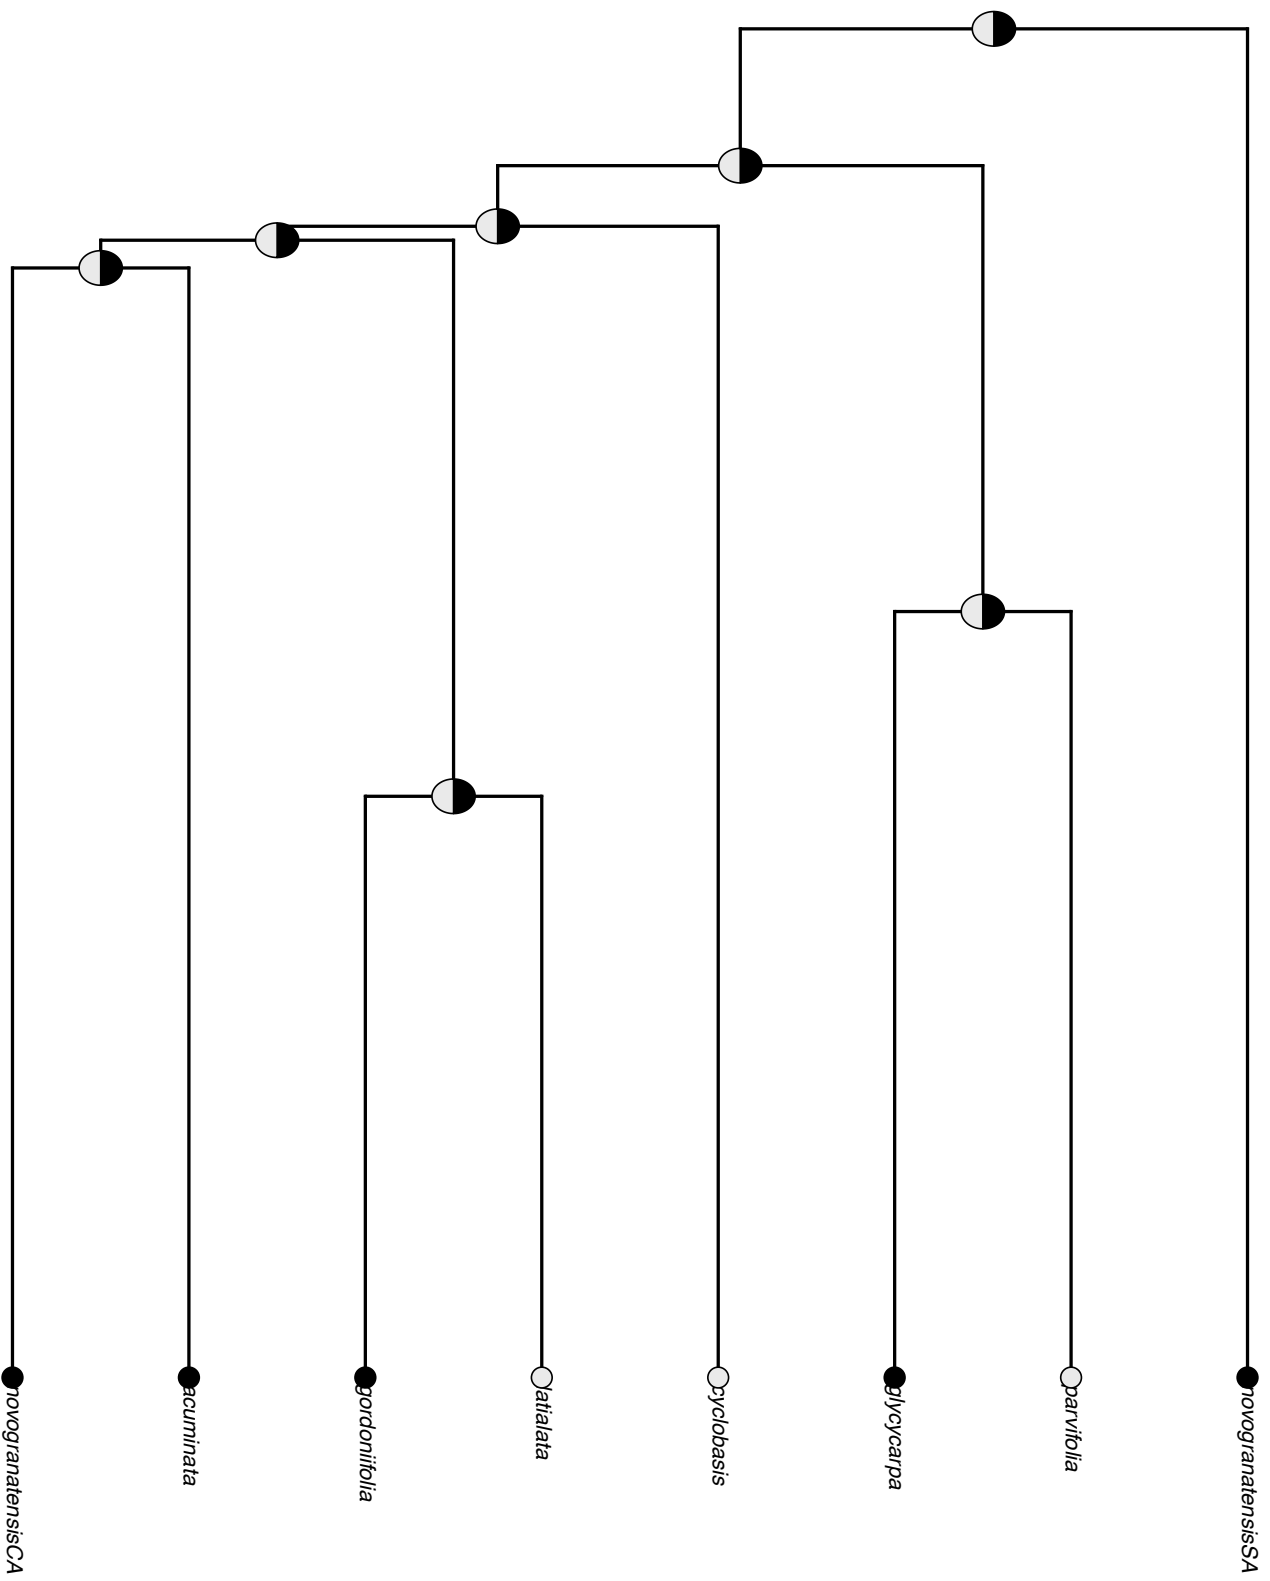

gynoecium :  
glabrous  
pubescent

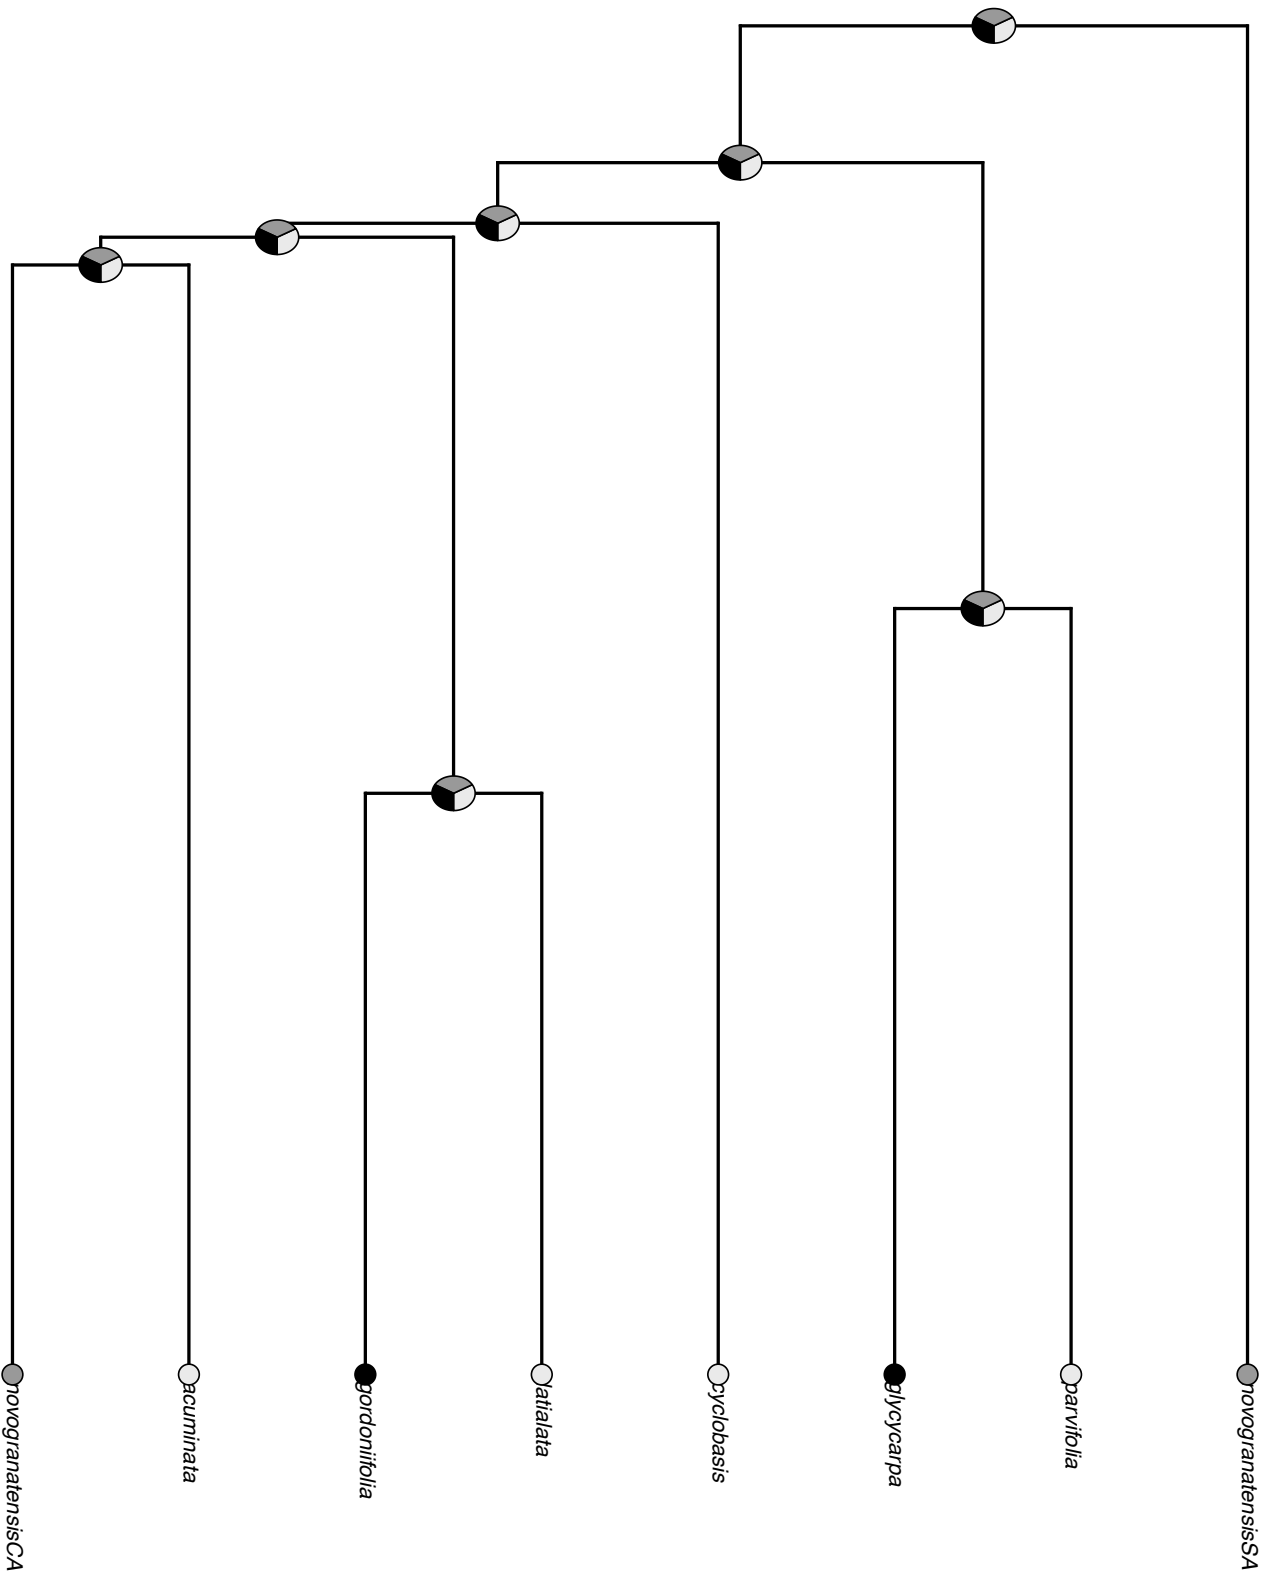

leaf abaxial pubescence color:  
whitish  
whitish-ferruginous  
ferruginous

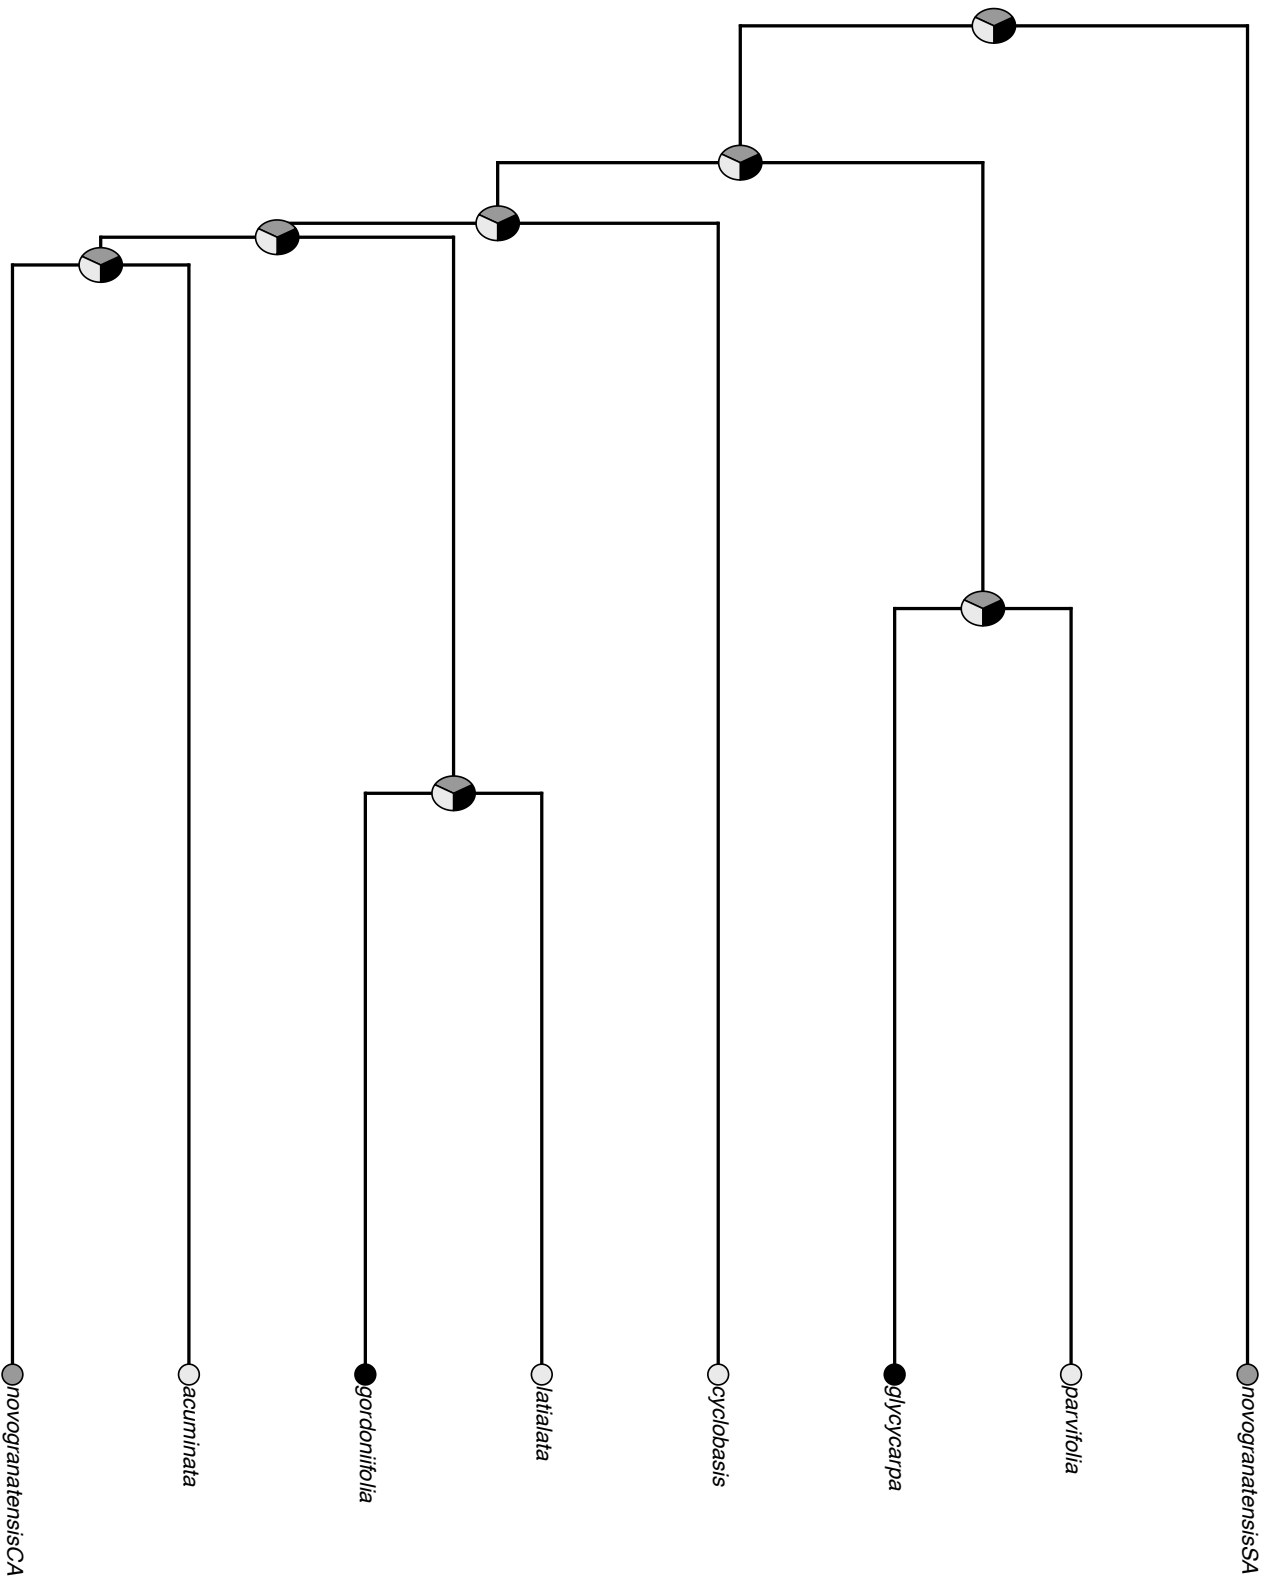

leaf abaxial pubescence:  
glabrescent - somewhat pubescent  
glabrescent to densely pubescent  
densely pubescent

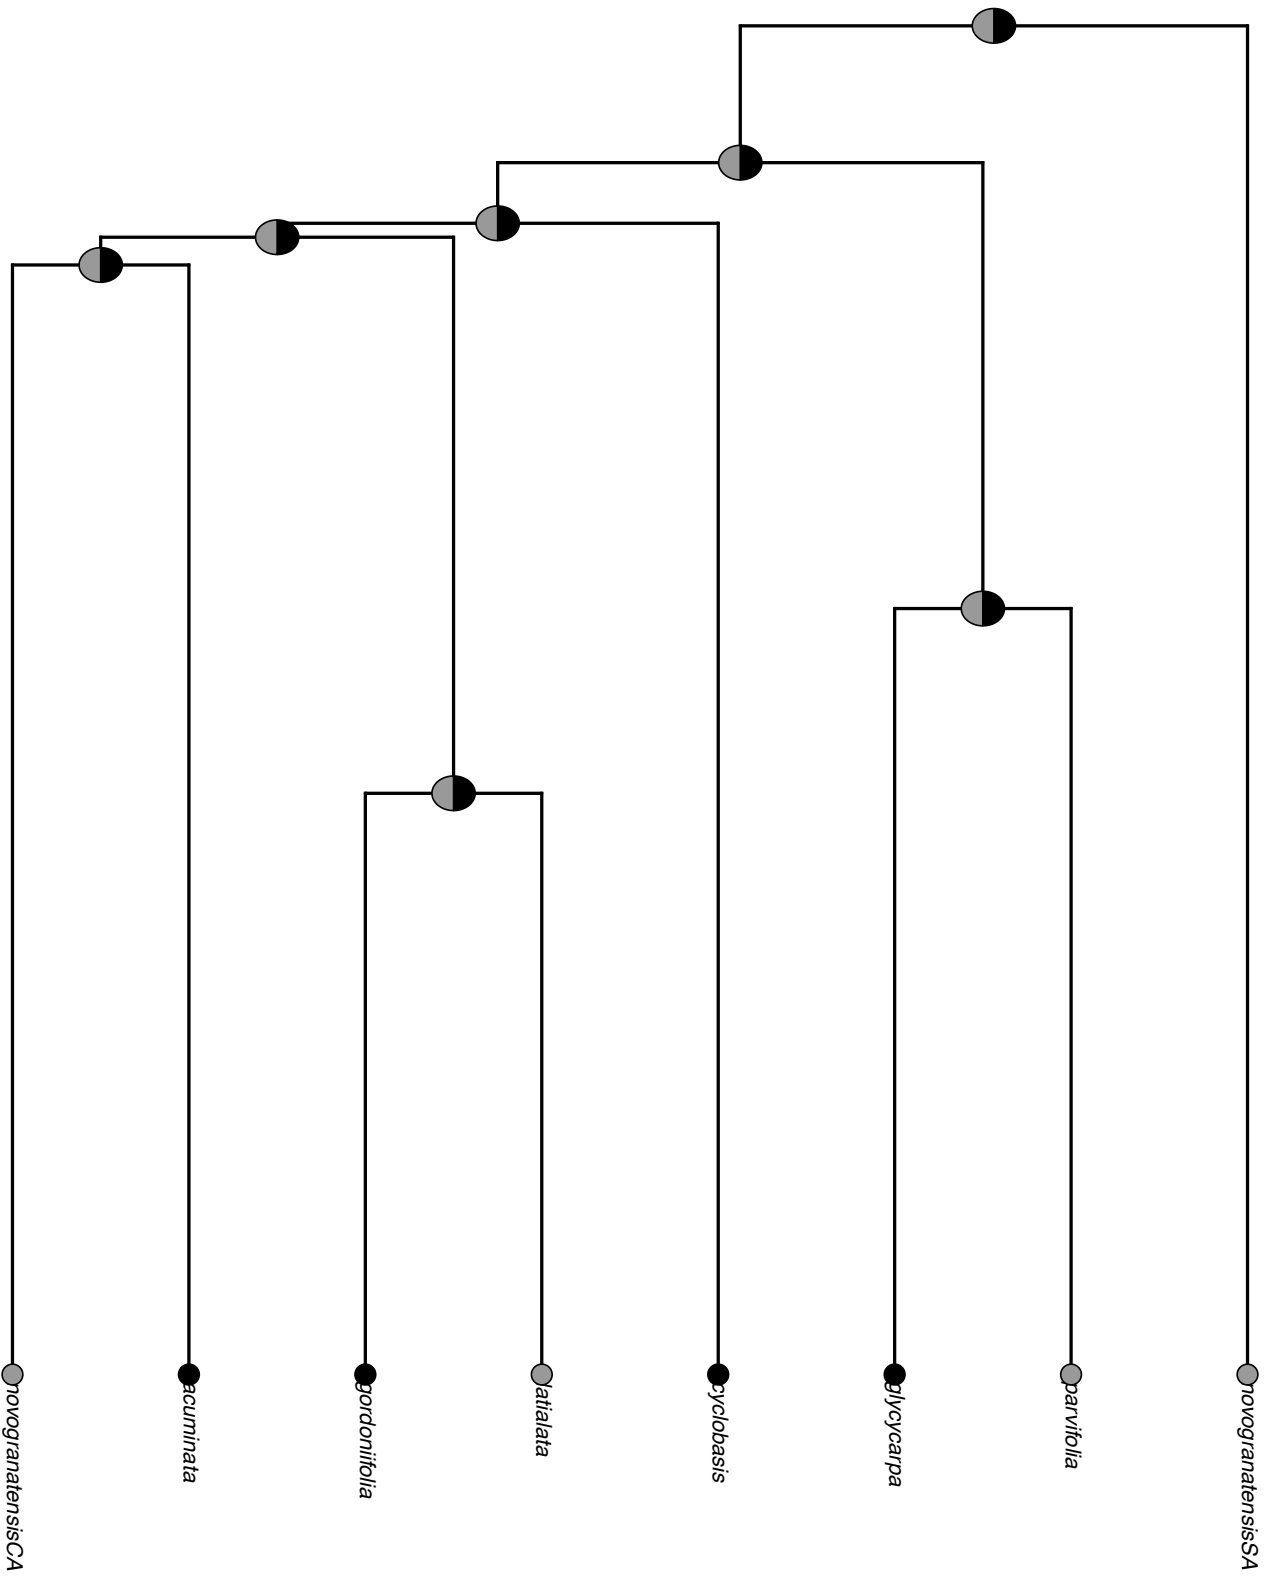

petiole :  
■ somewhat/obscurely winged  
■ winged

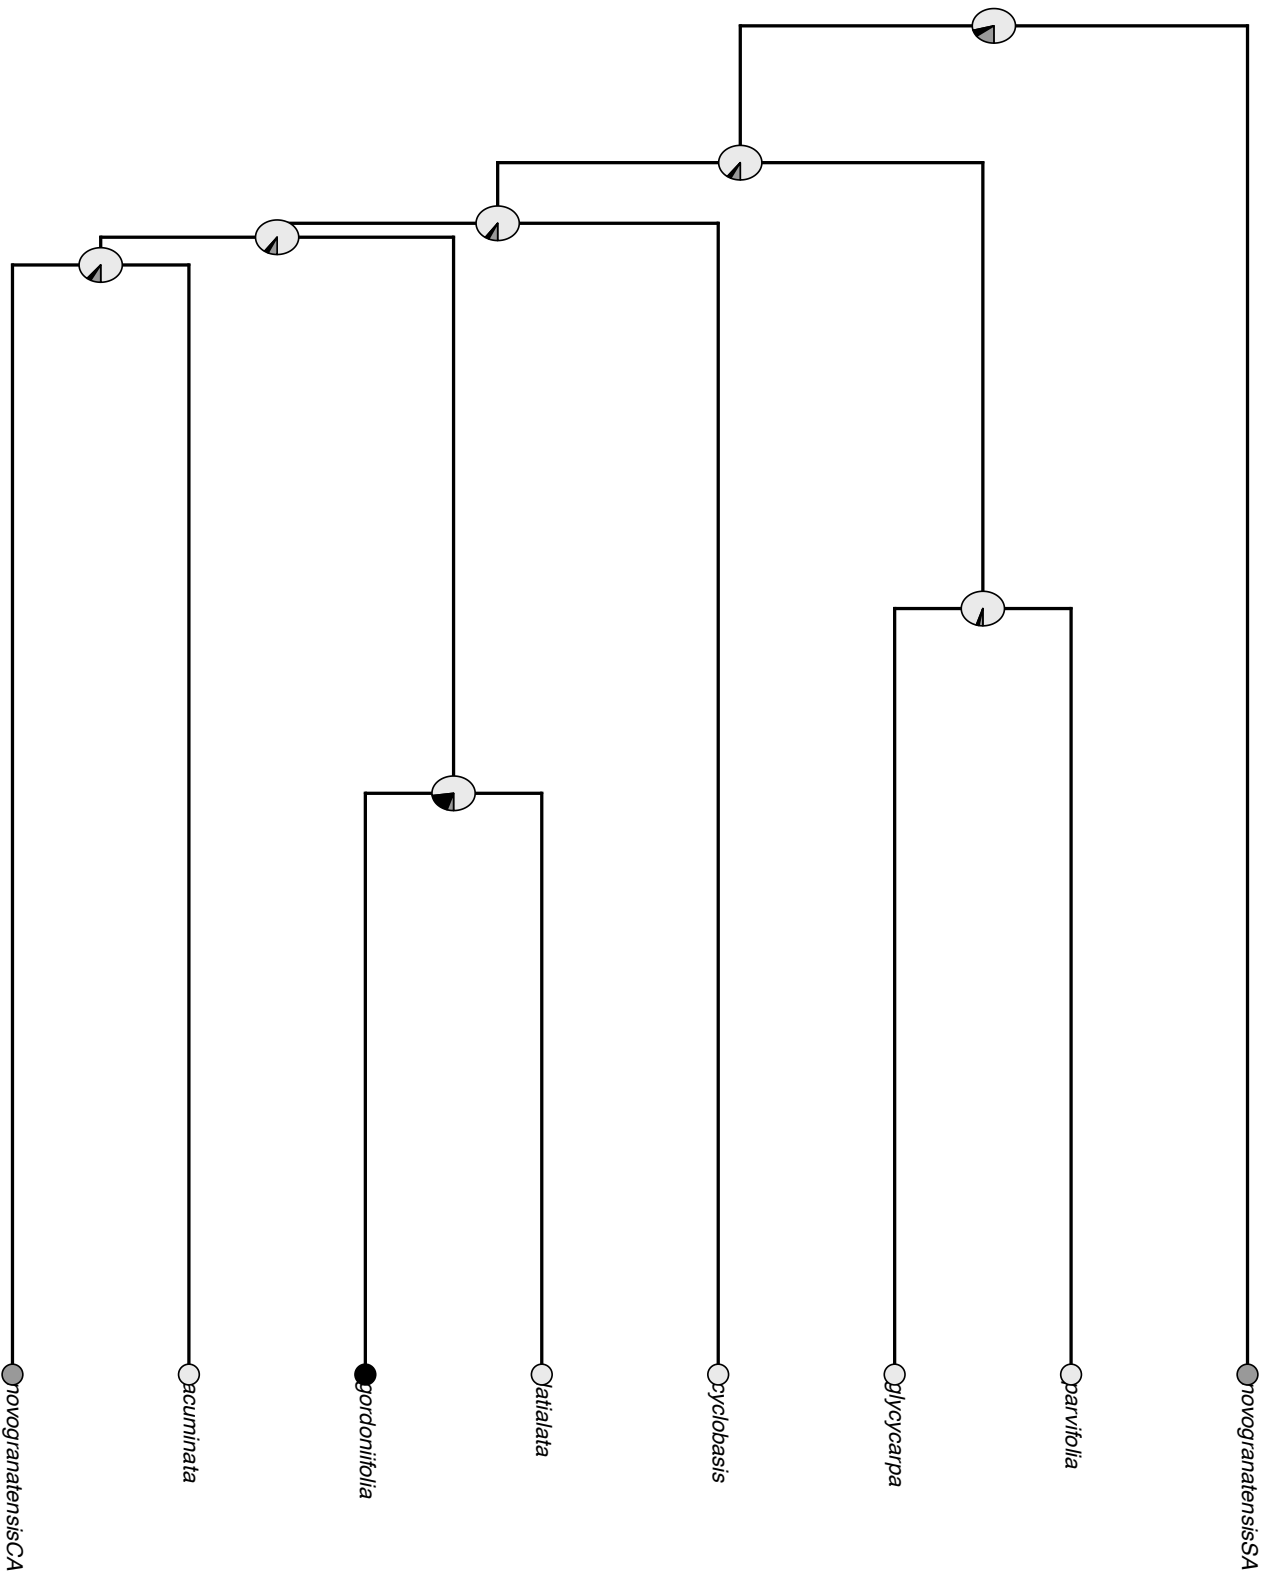

intramarginal veins:  
absent  
rarely, not raised  
present

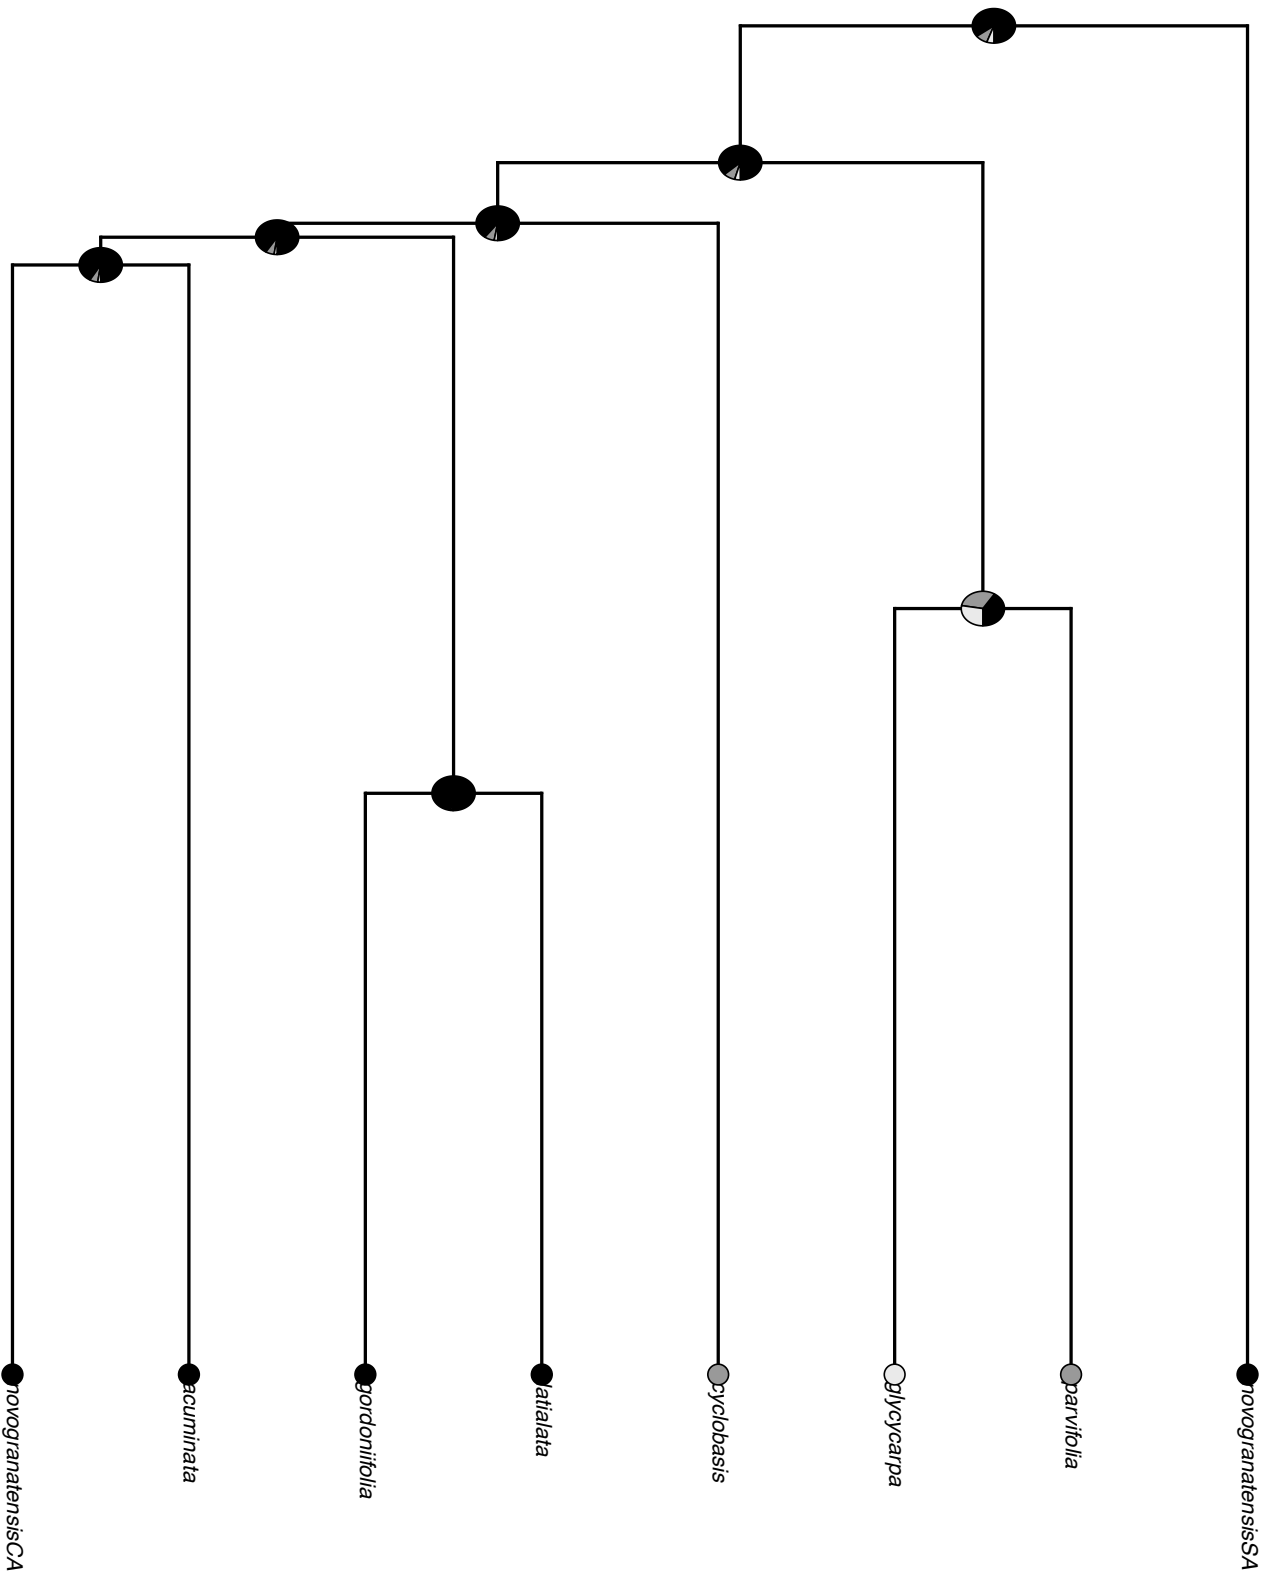

seed:  
not prickled  
occasionally prickled  
prickled

Frost et al, Appendix S20

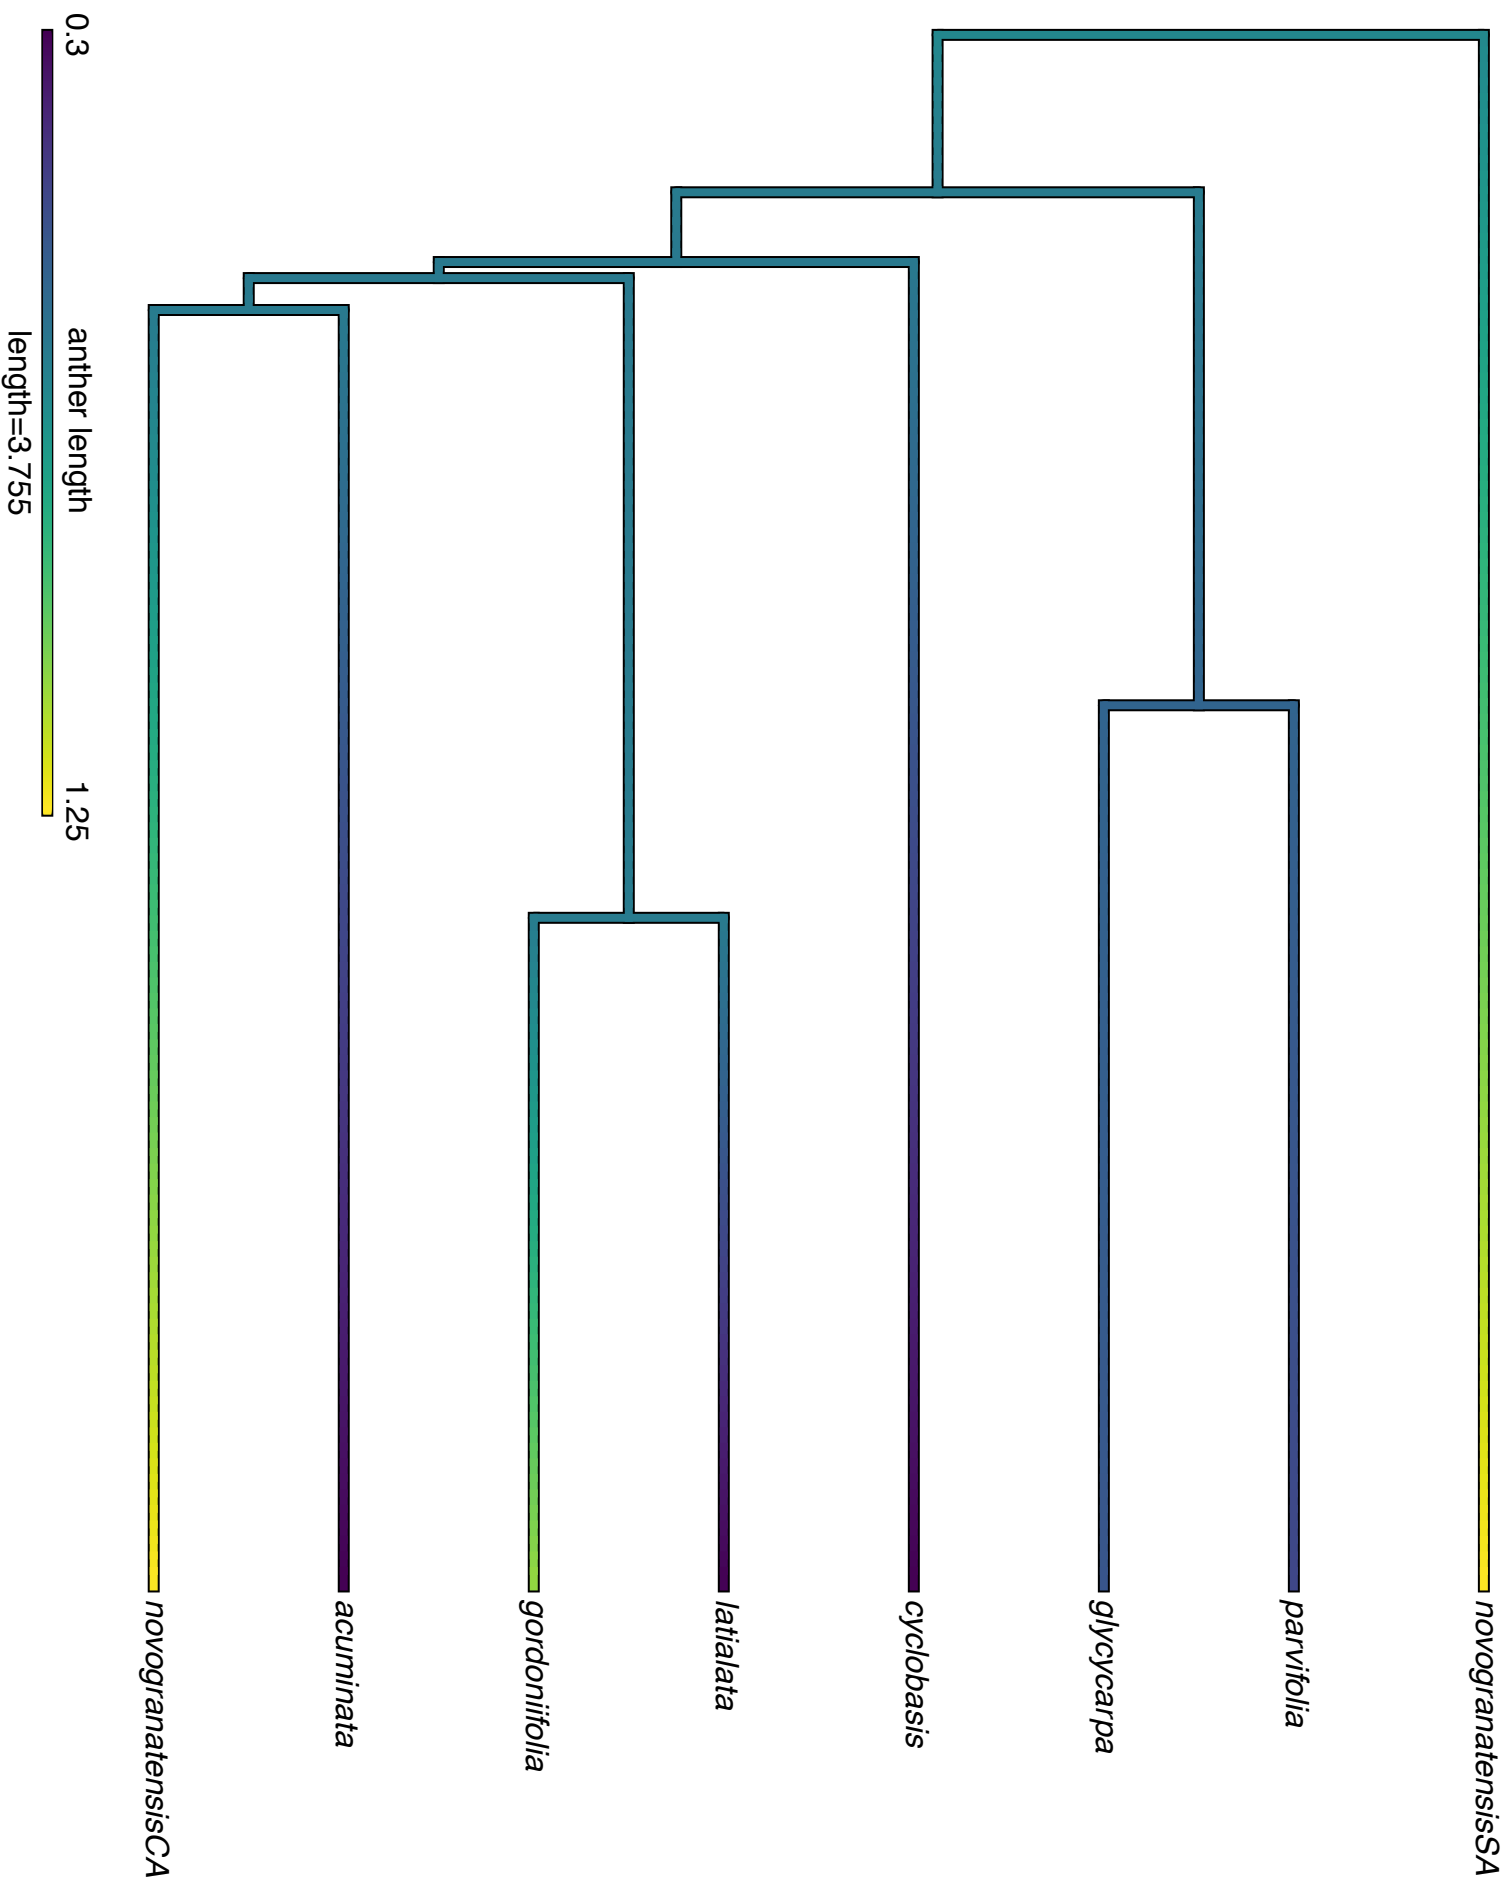

Frost et al, Appendix S21

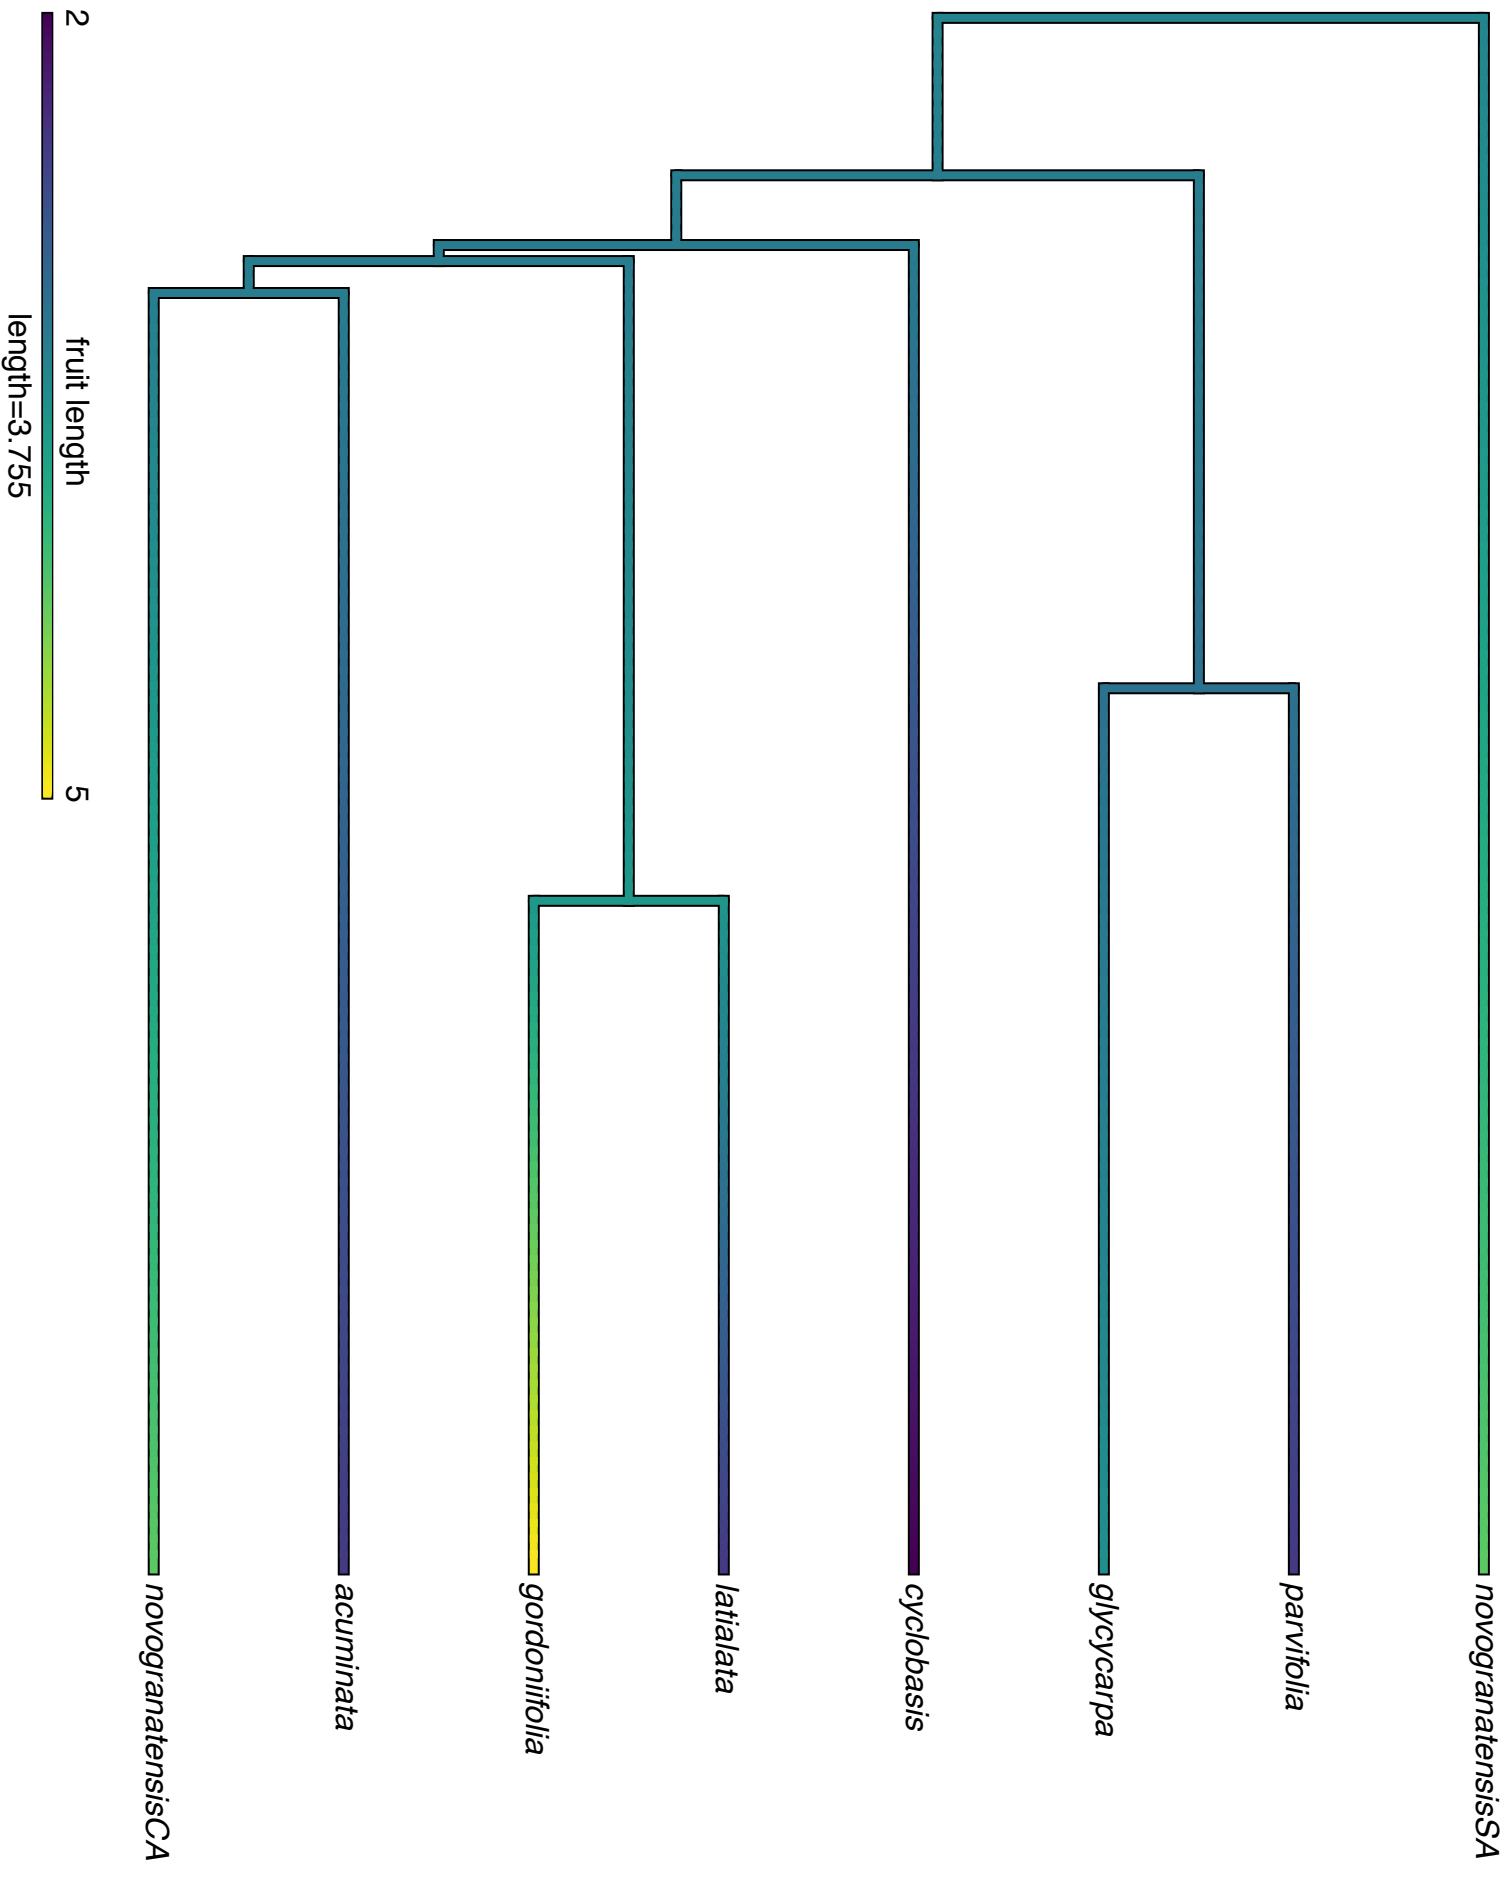



Frost et al, Appendix S22

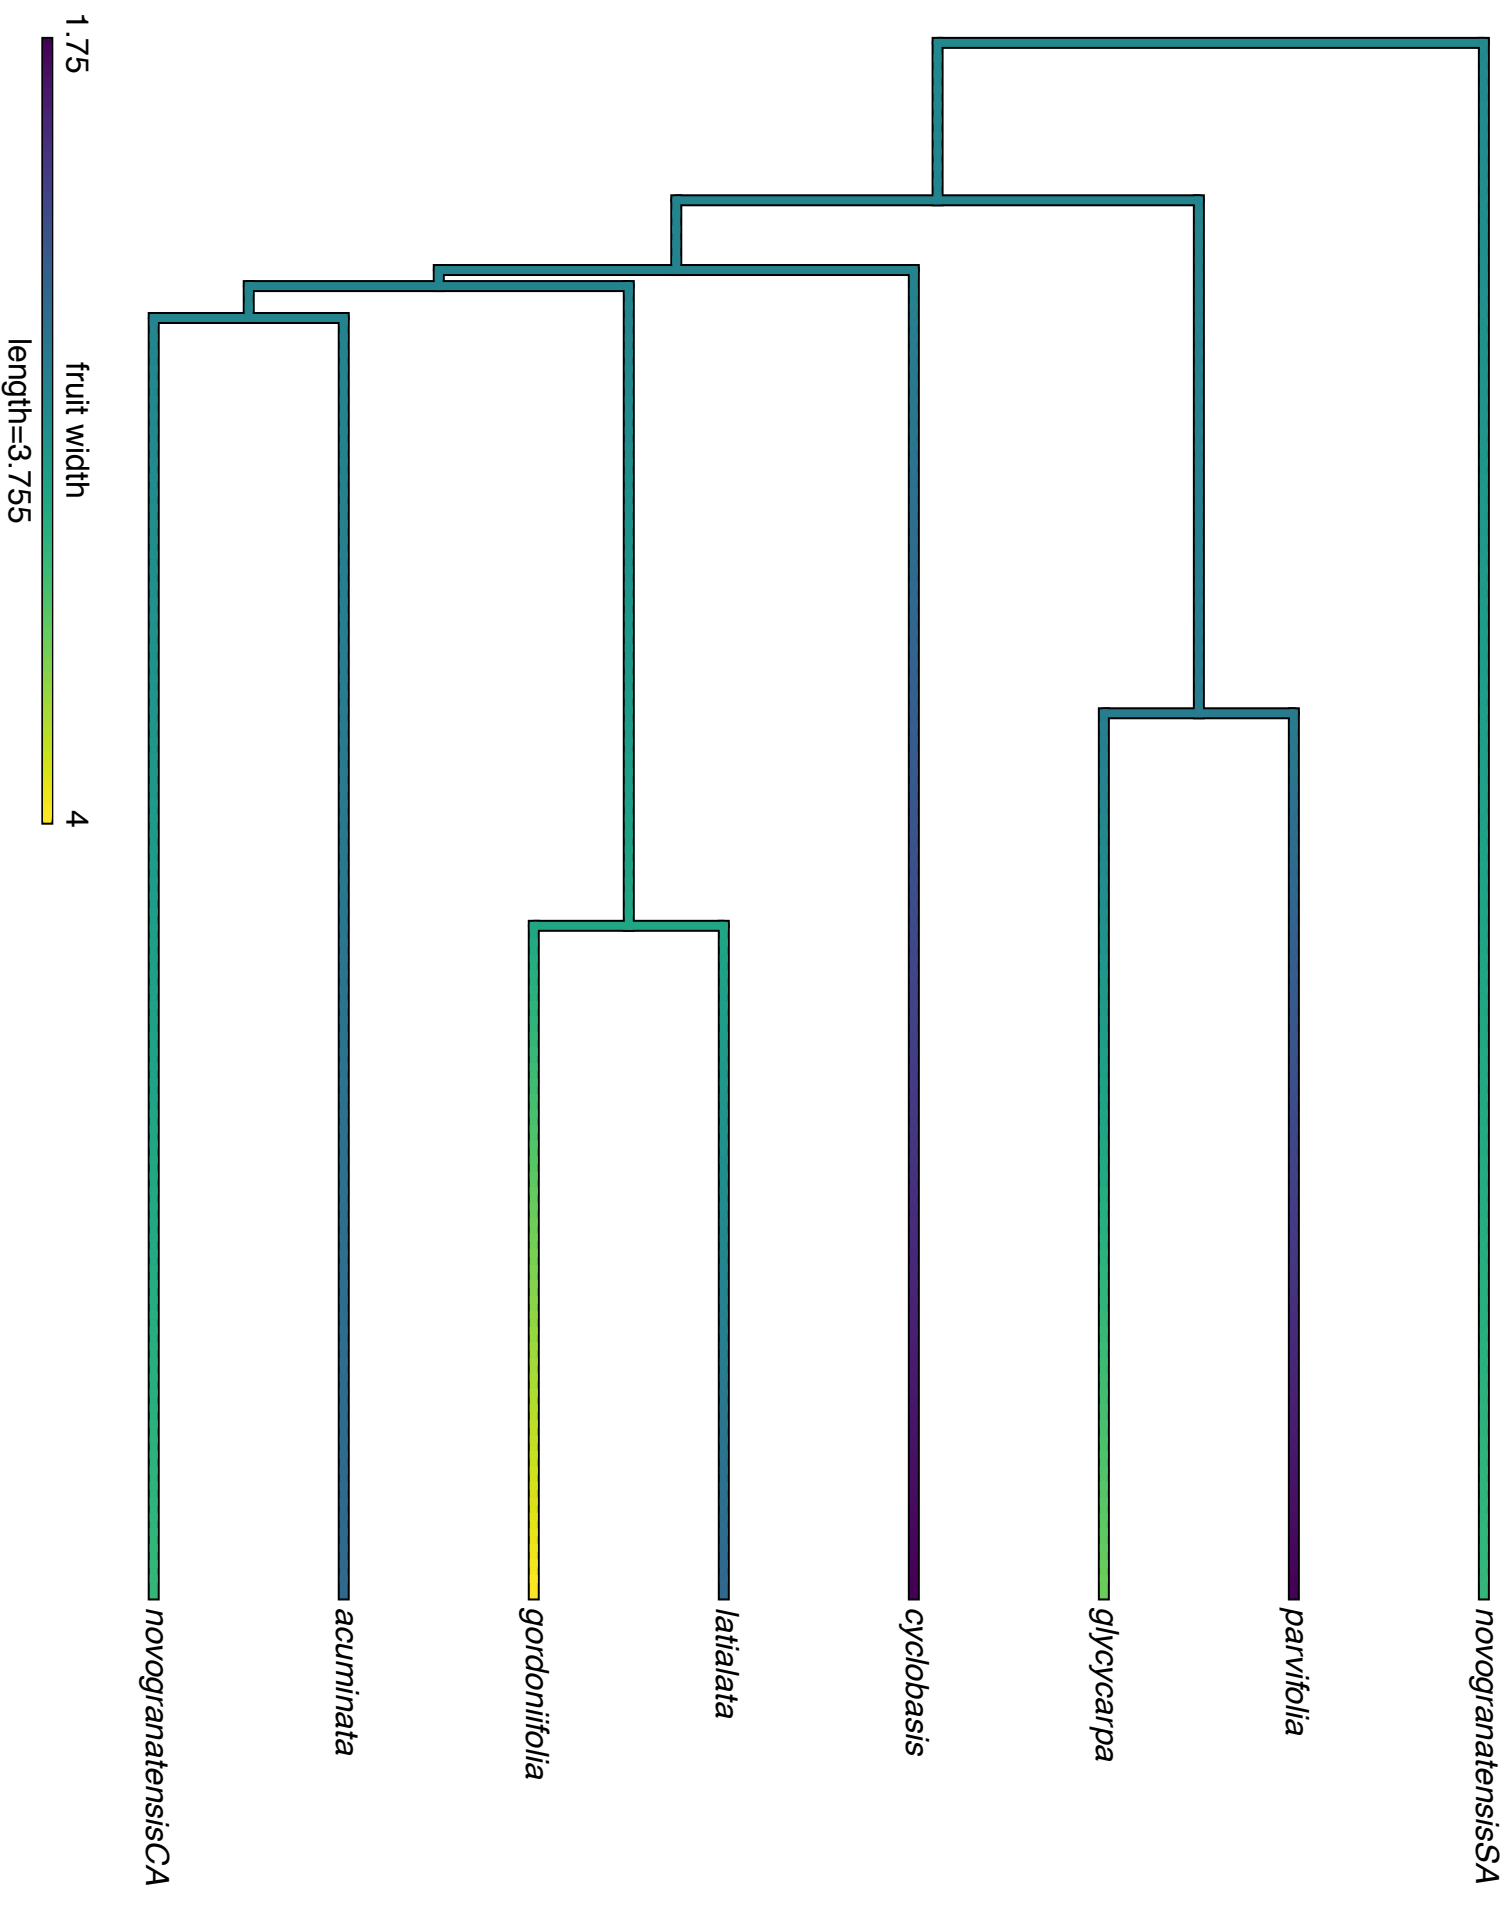

Frost et al, Appendix S23

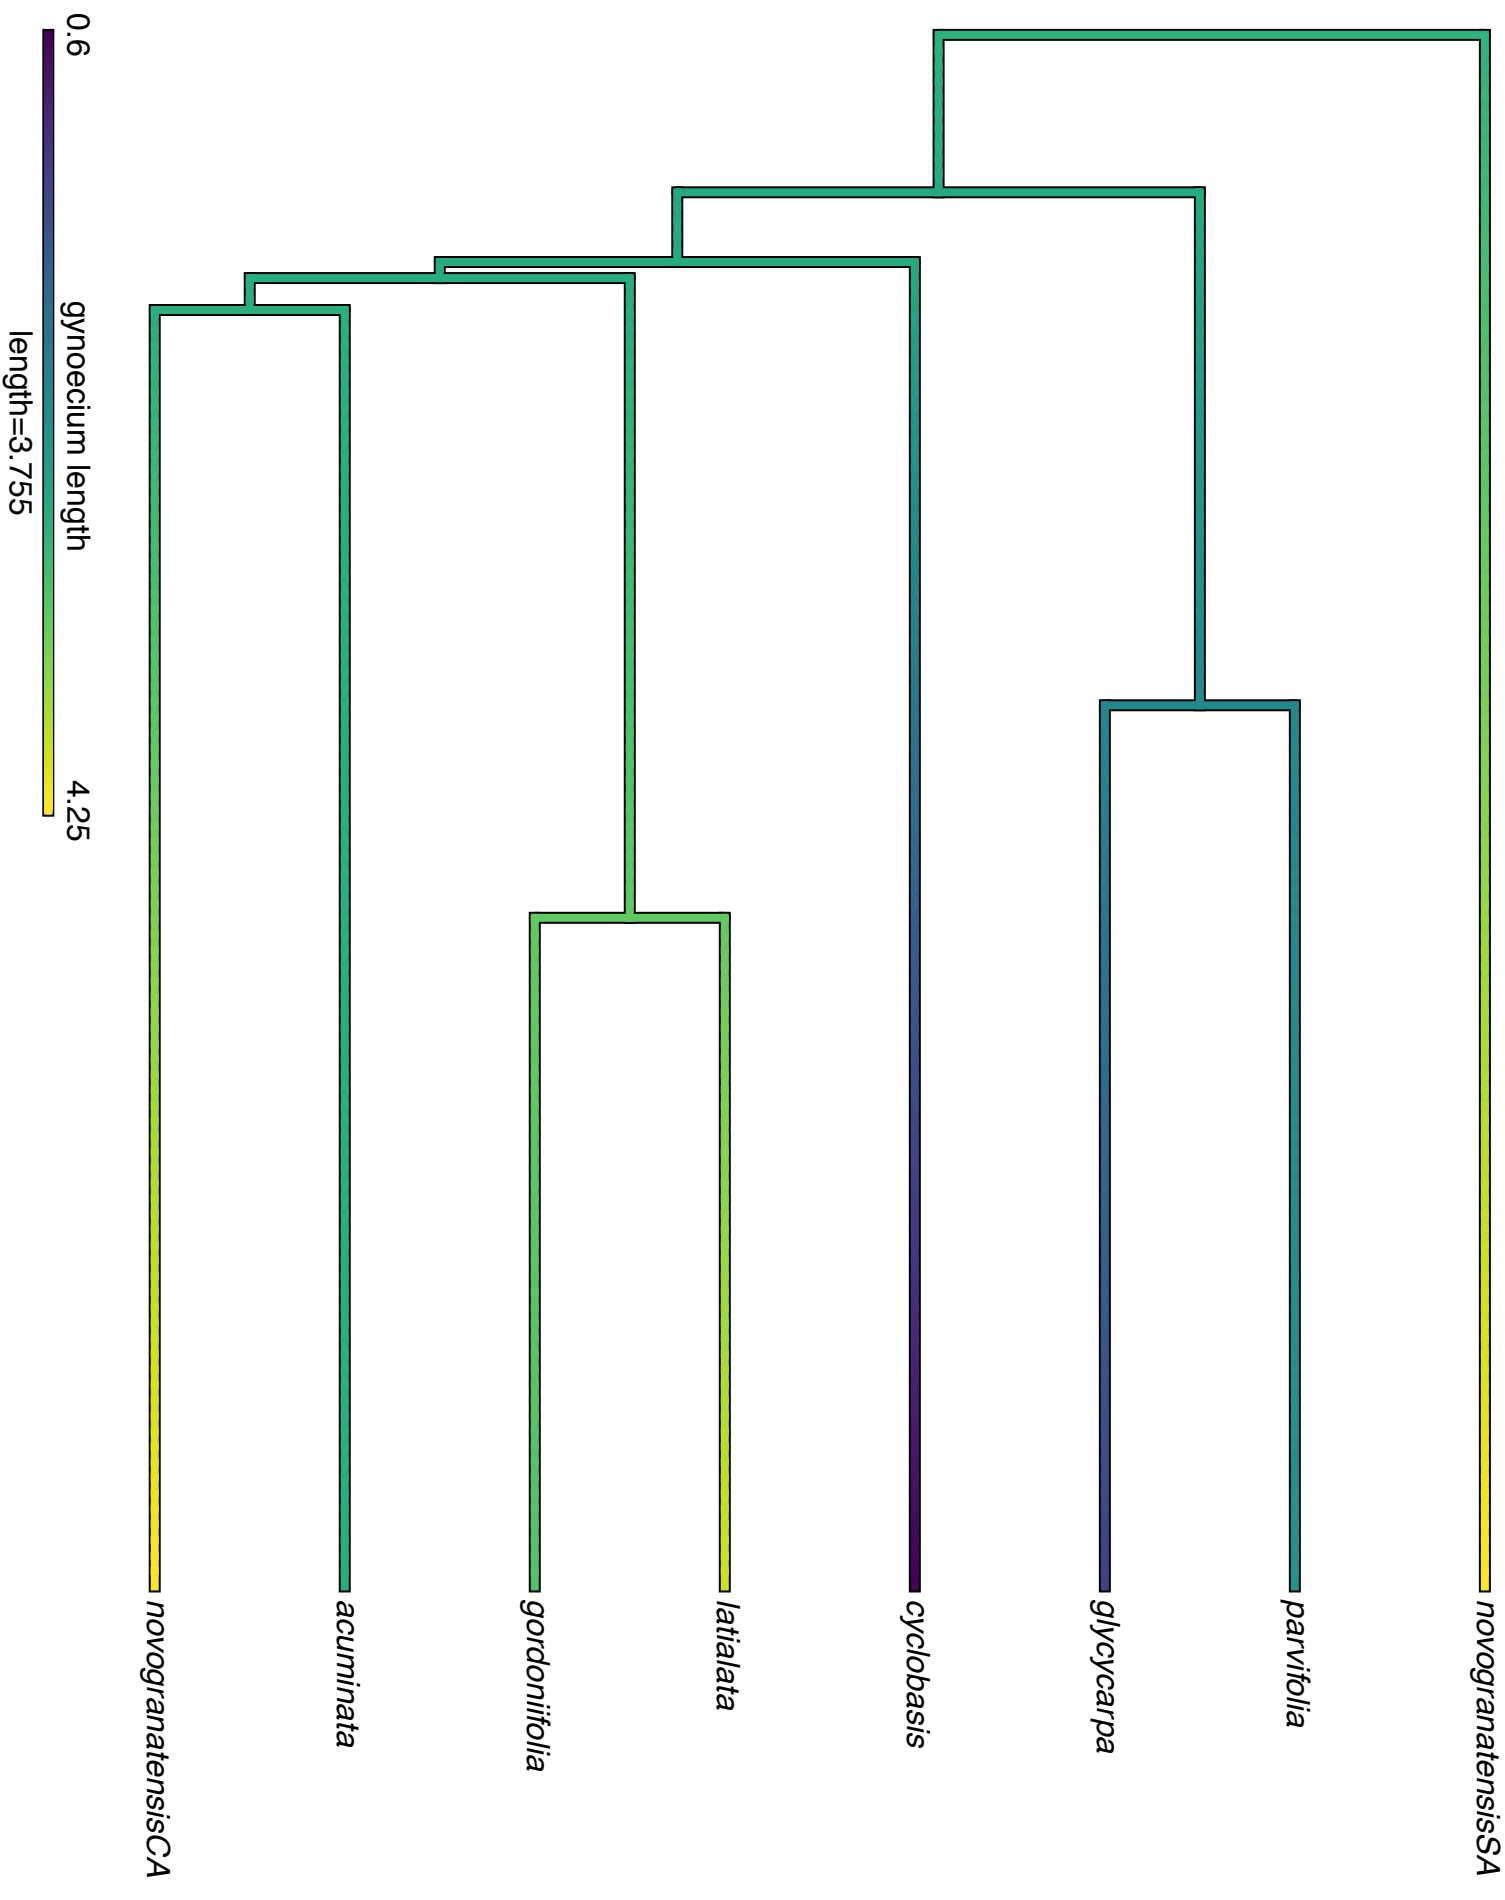

Frost et al, Appendix S24

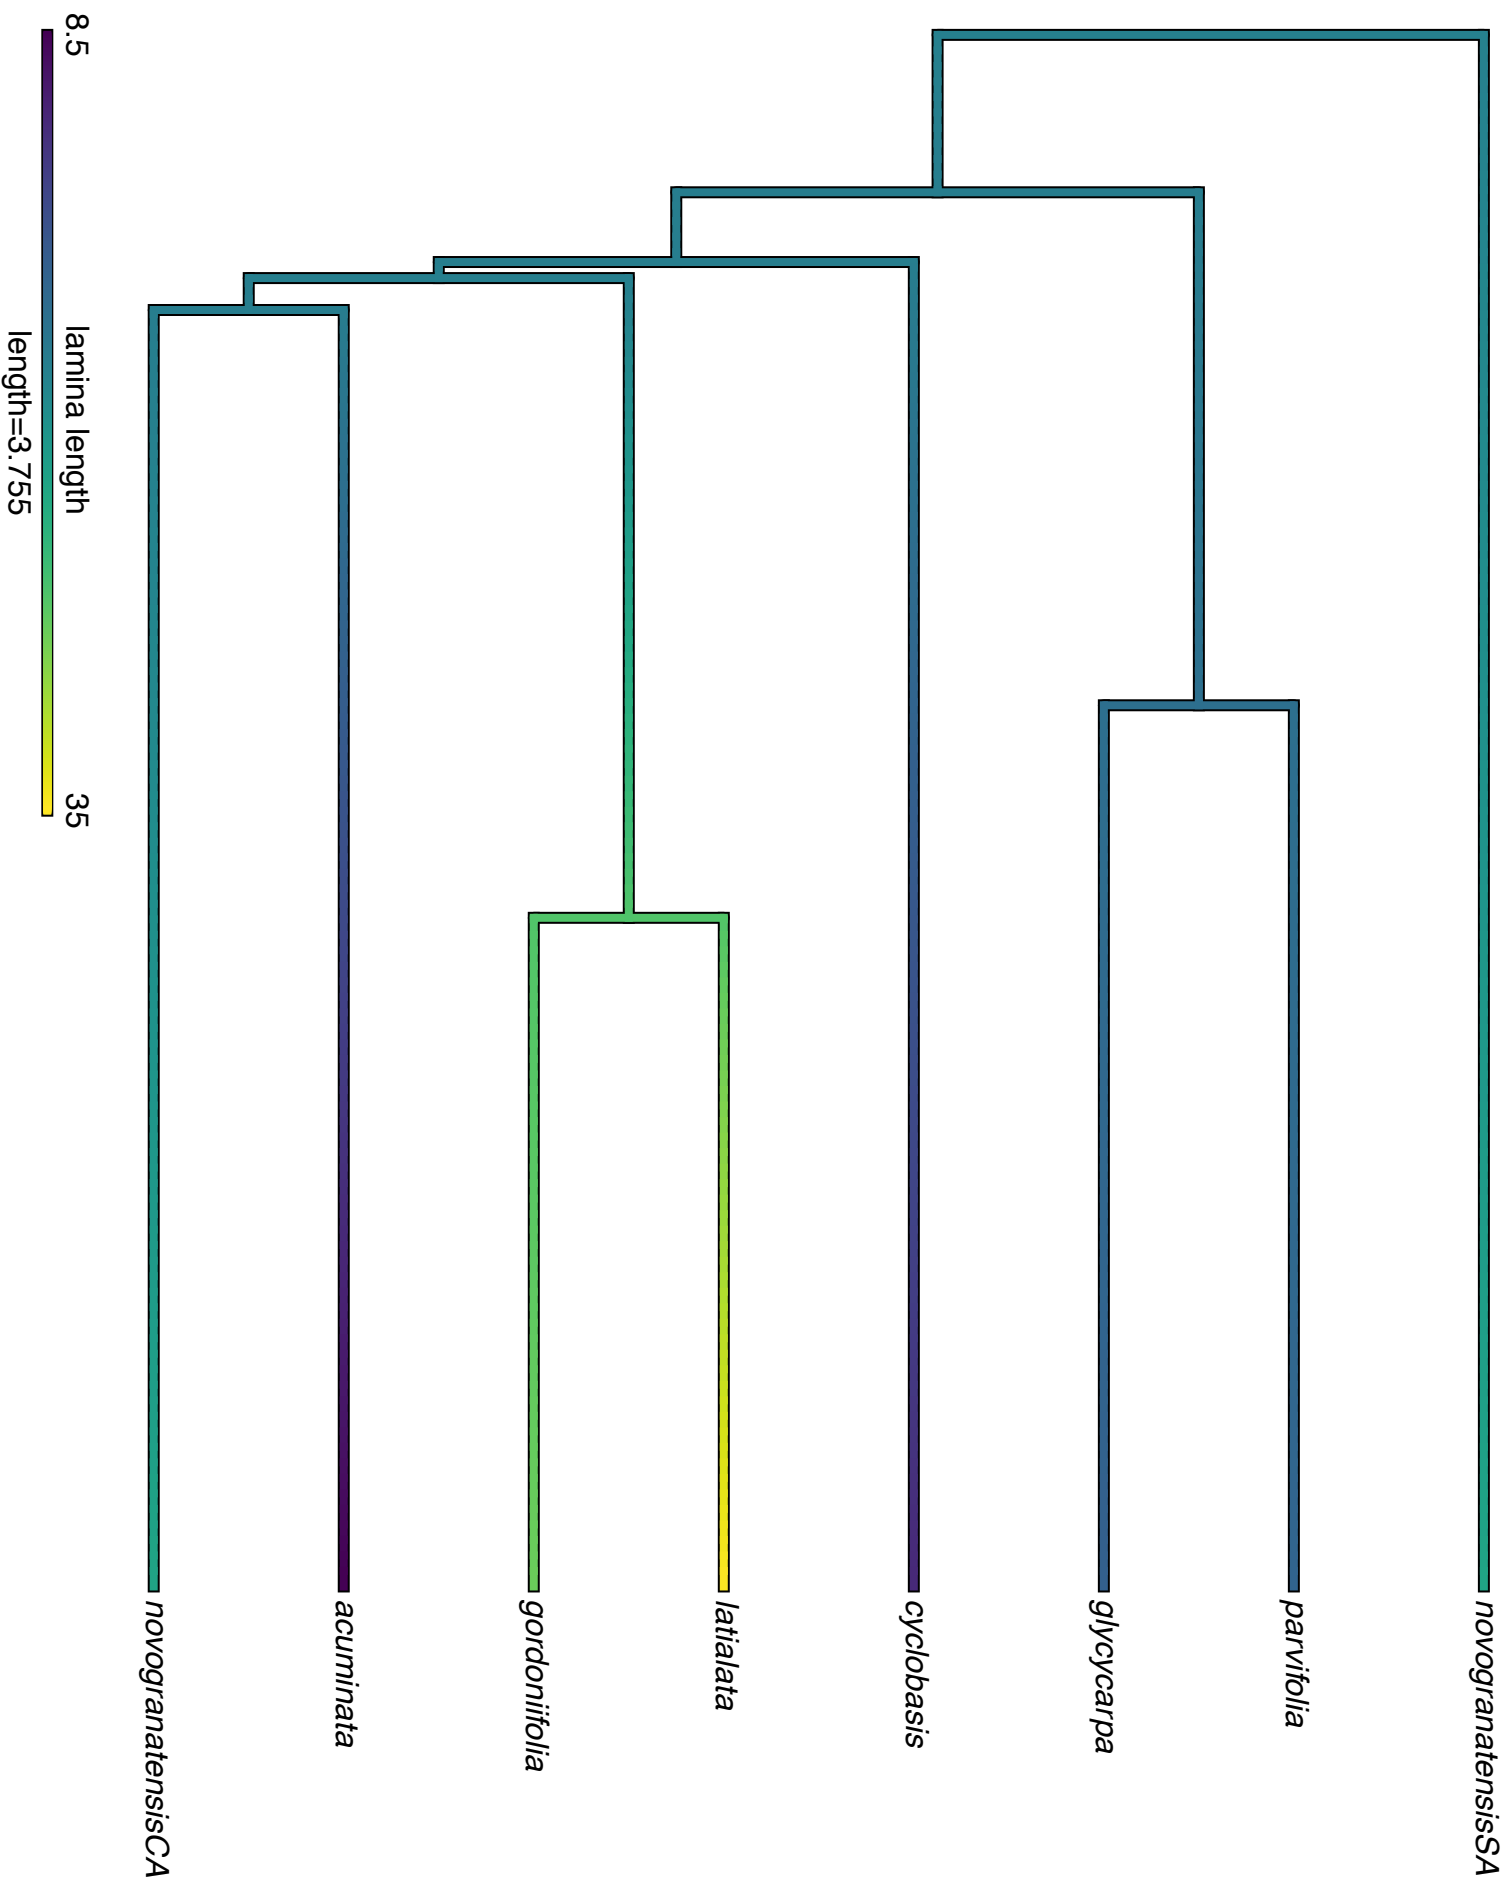

Frost et al, Appendix S25

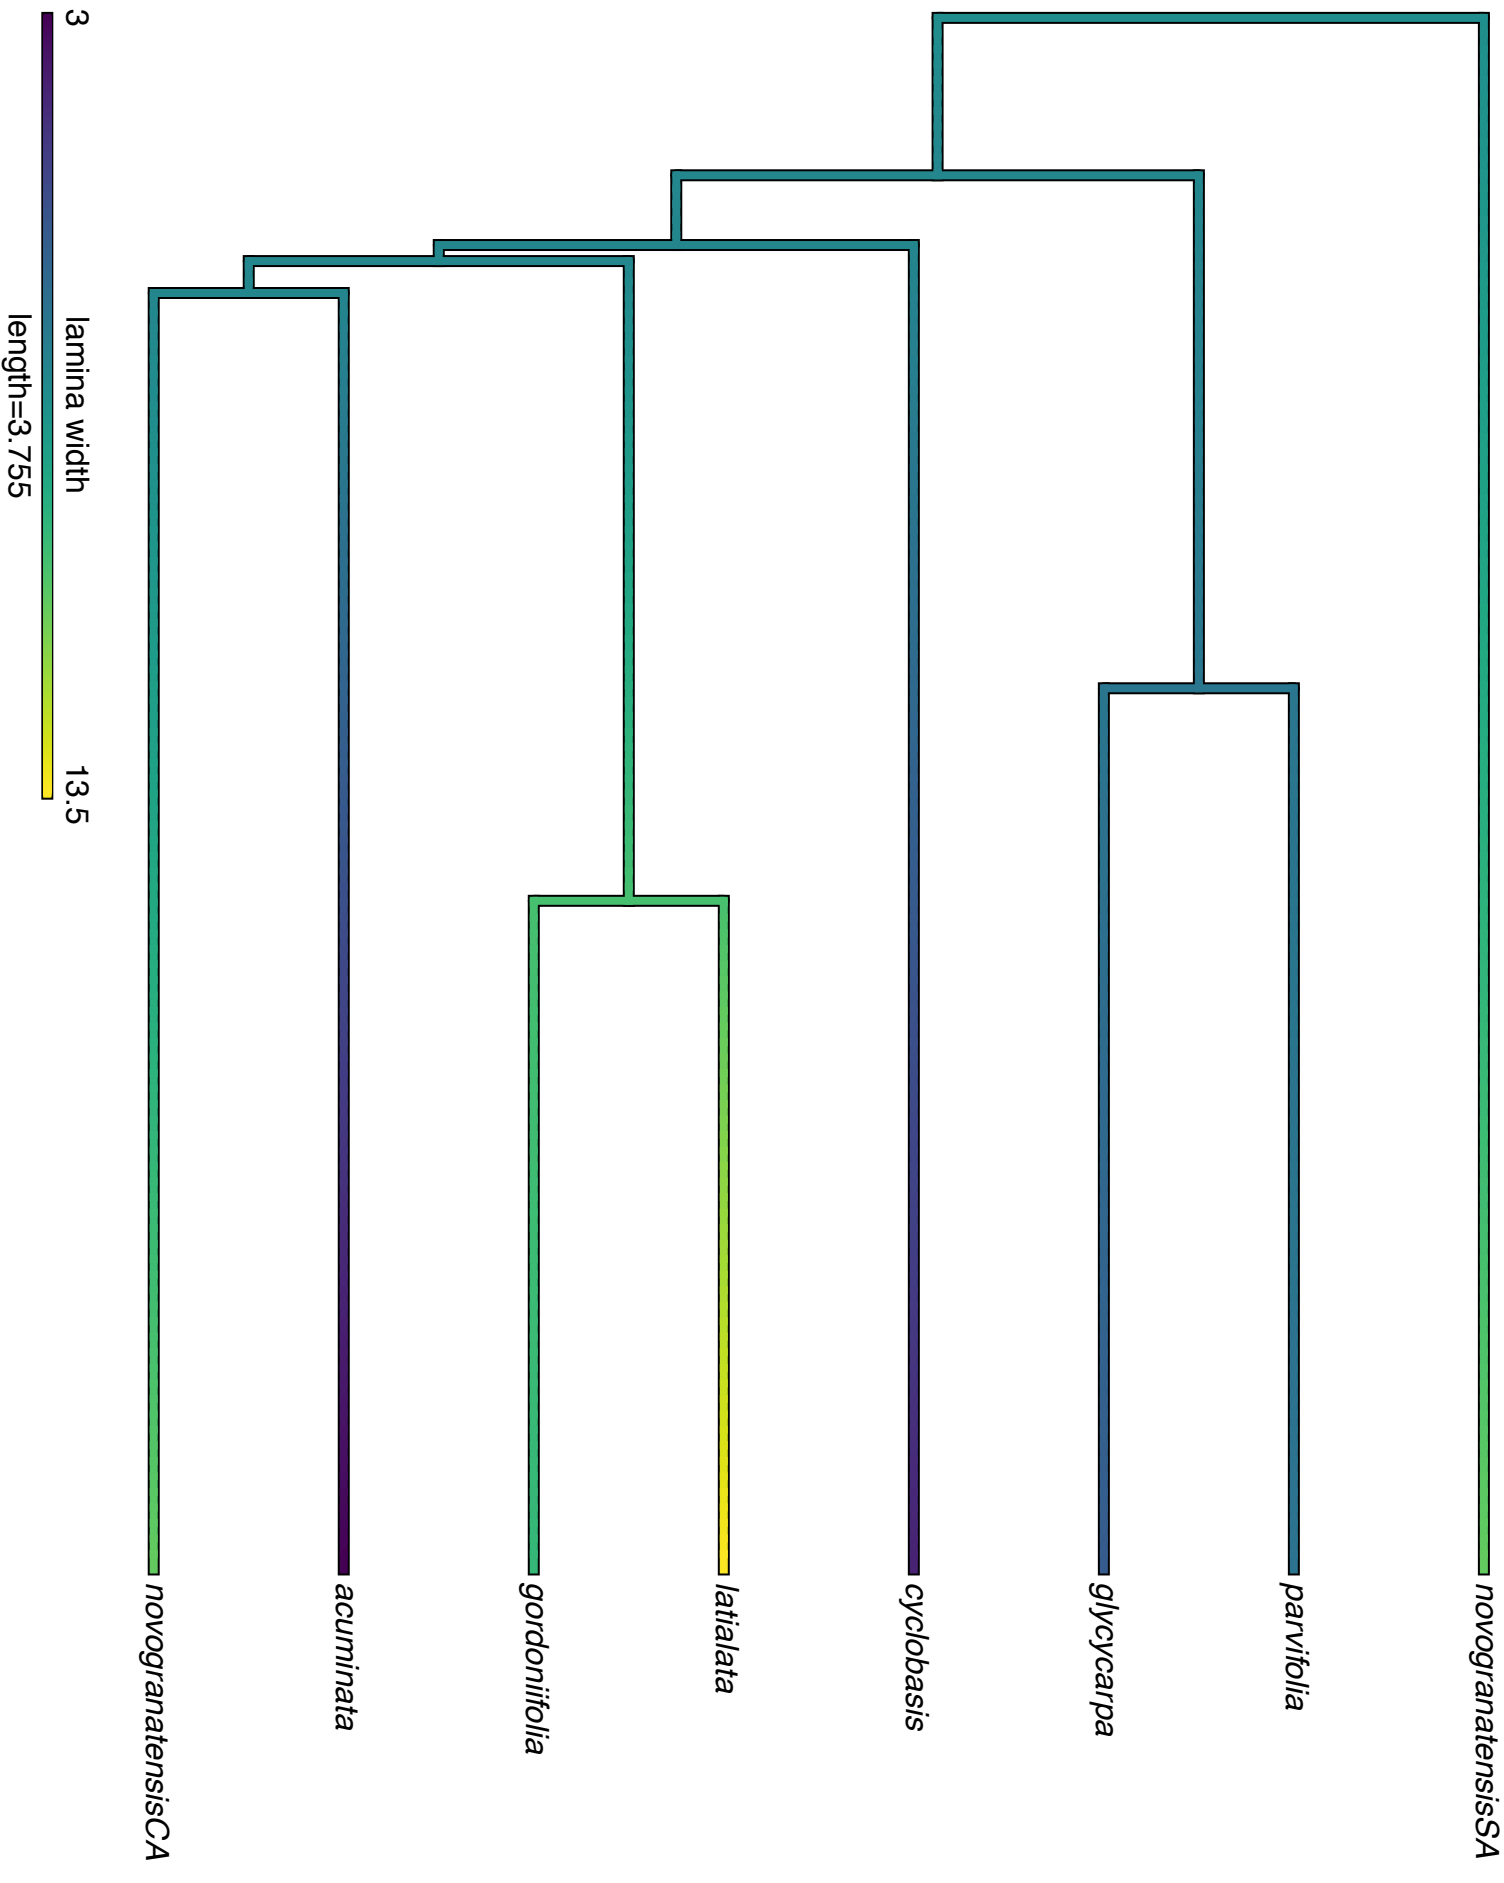

Frost et al, Appendix S26

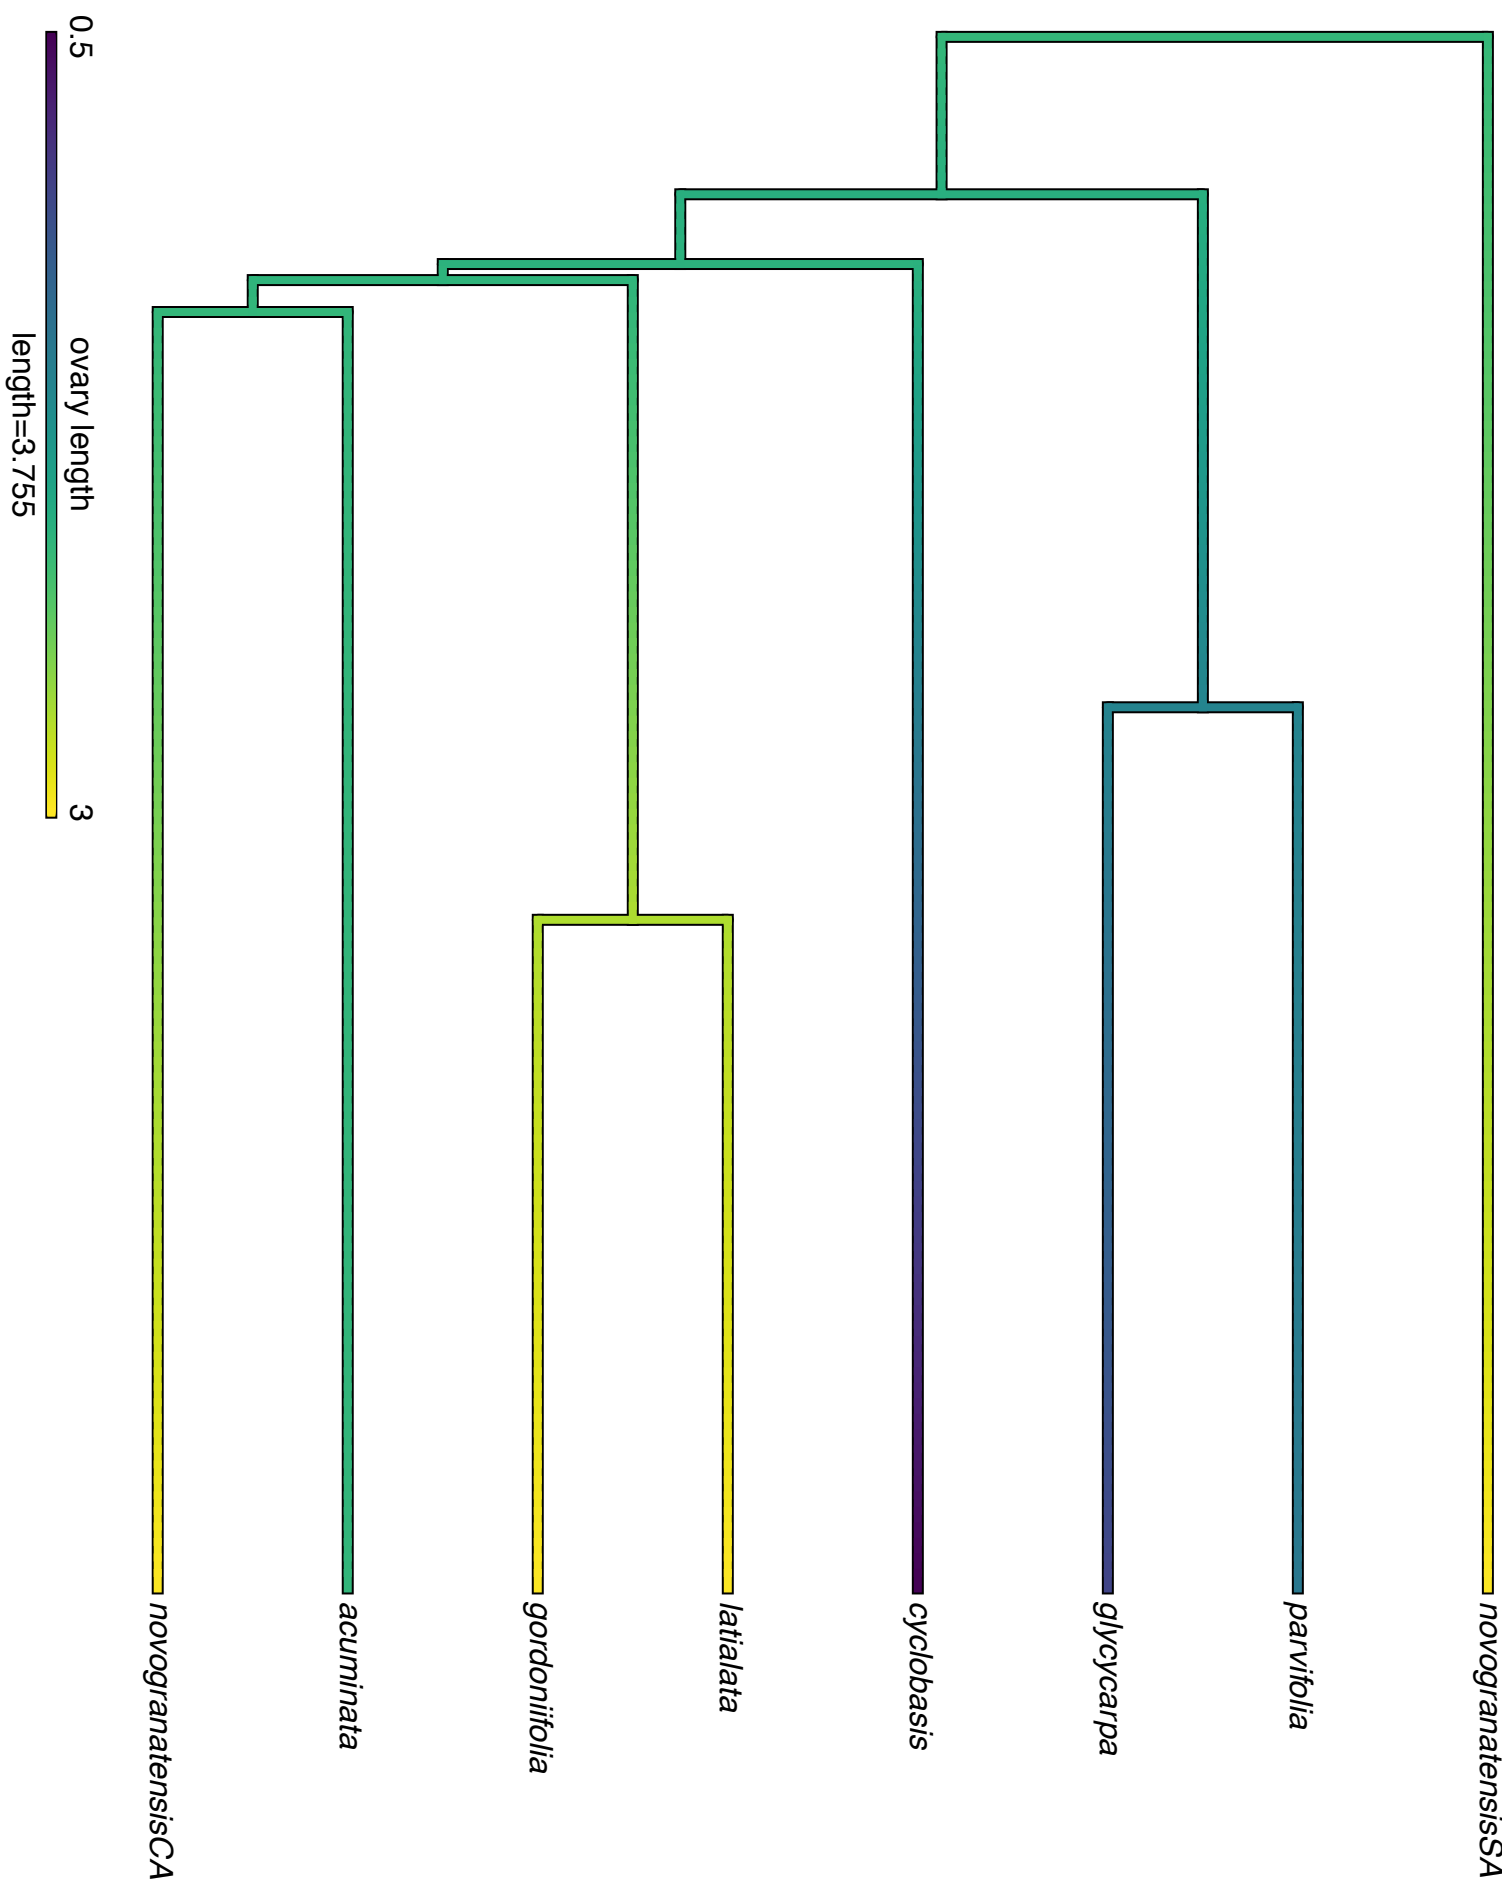

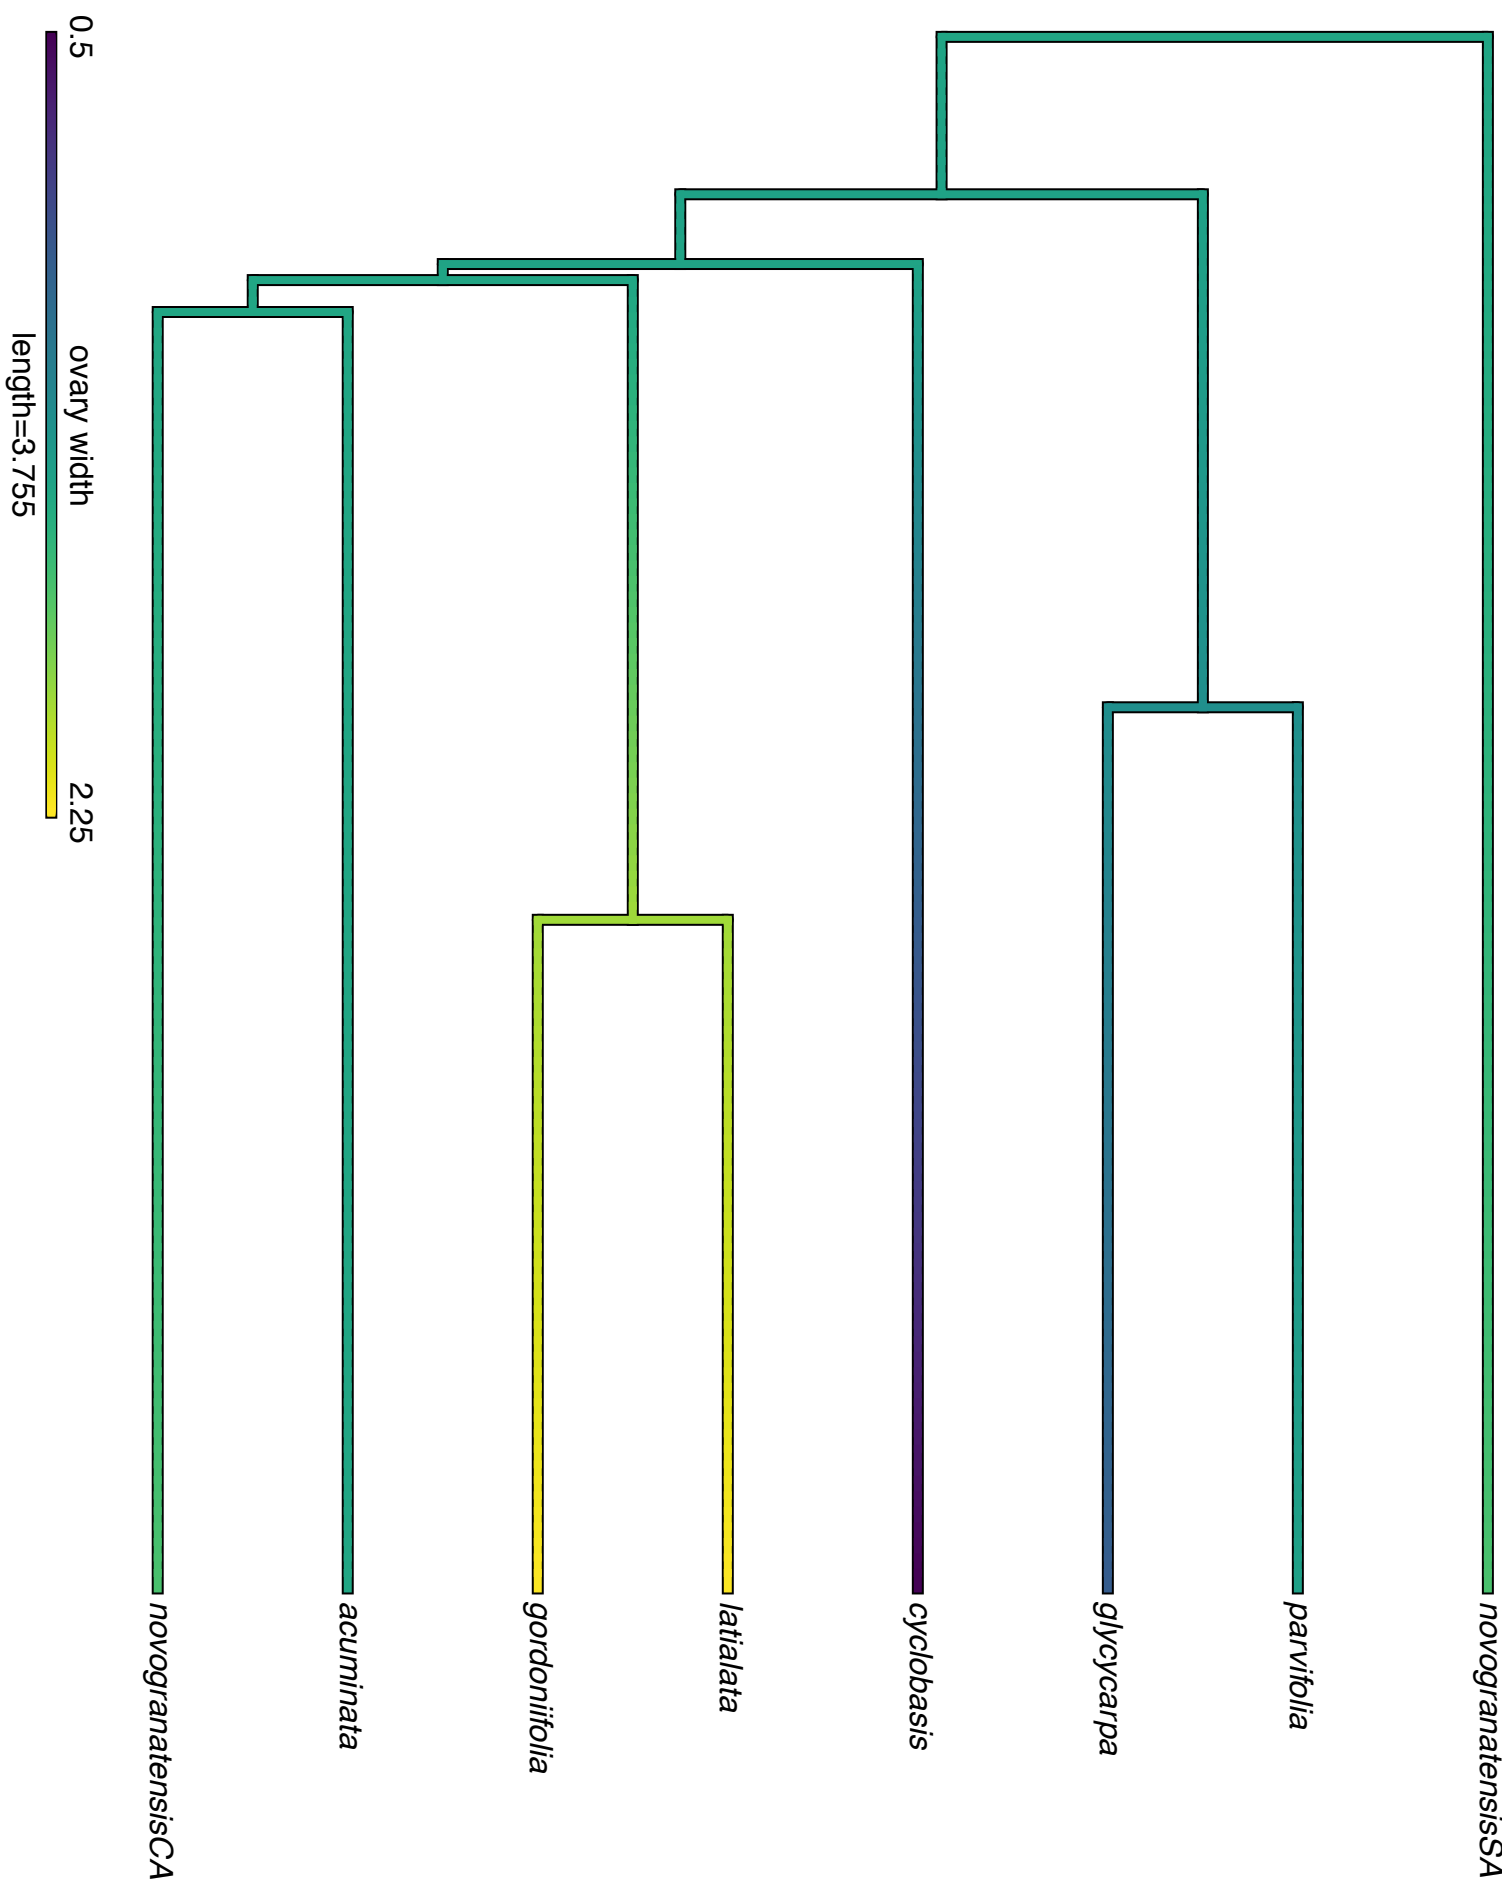

Frost et al, Appendix S28

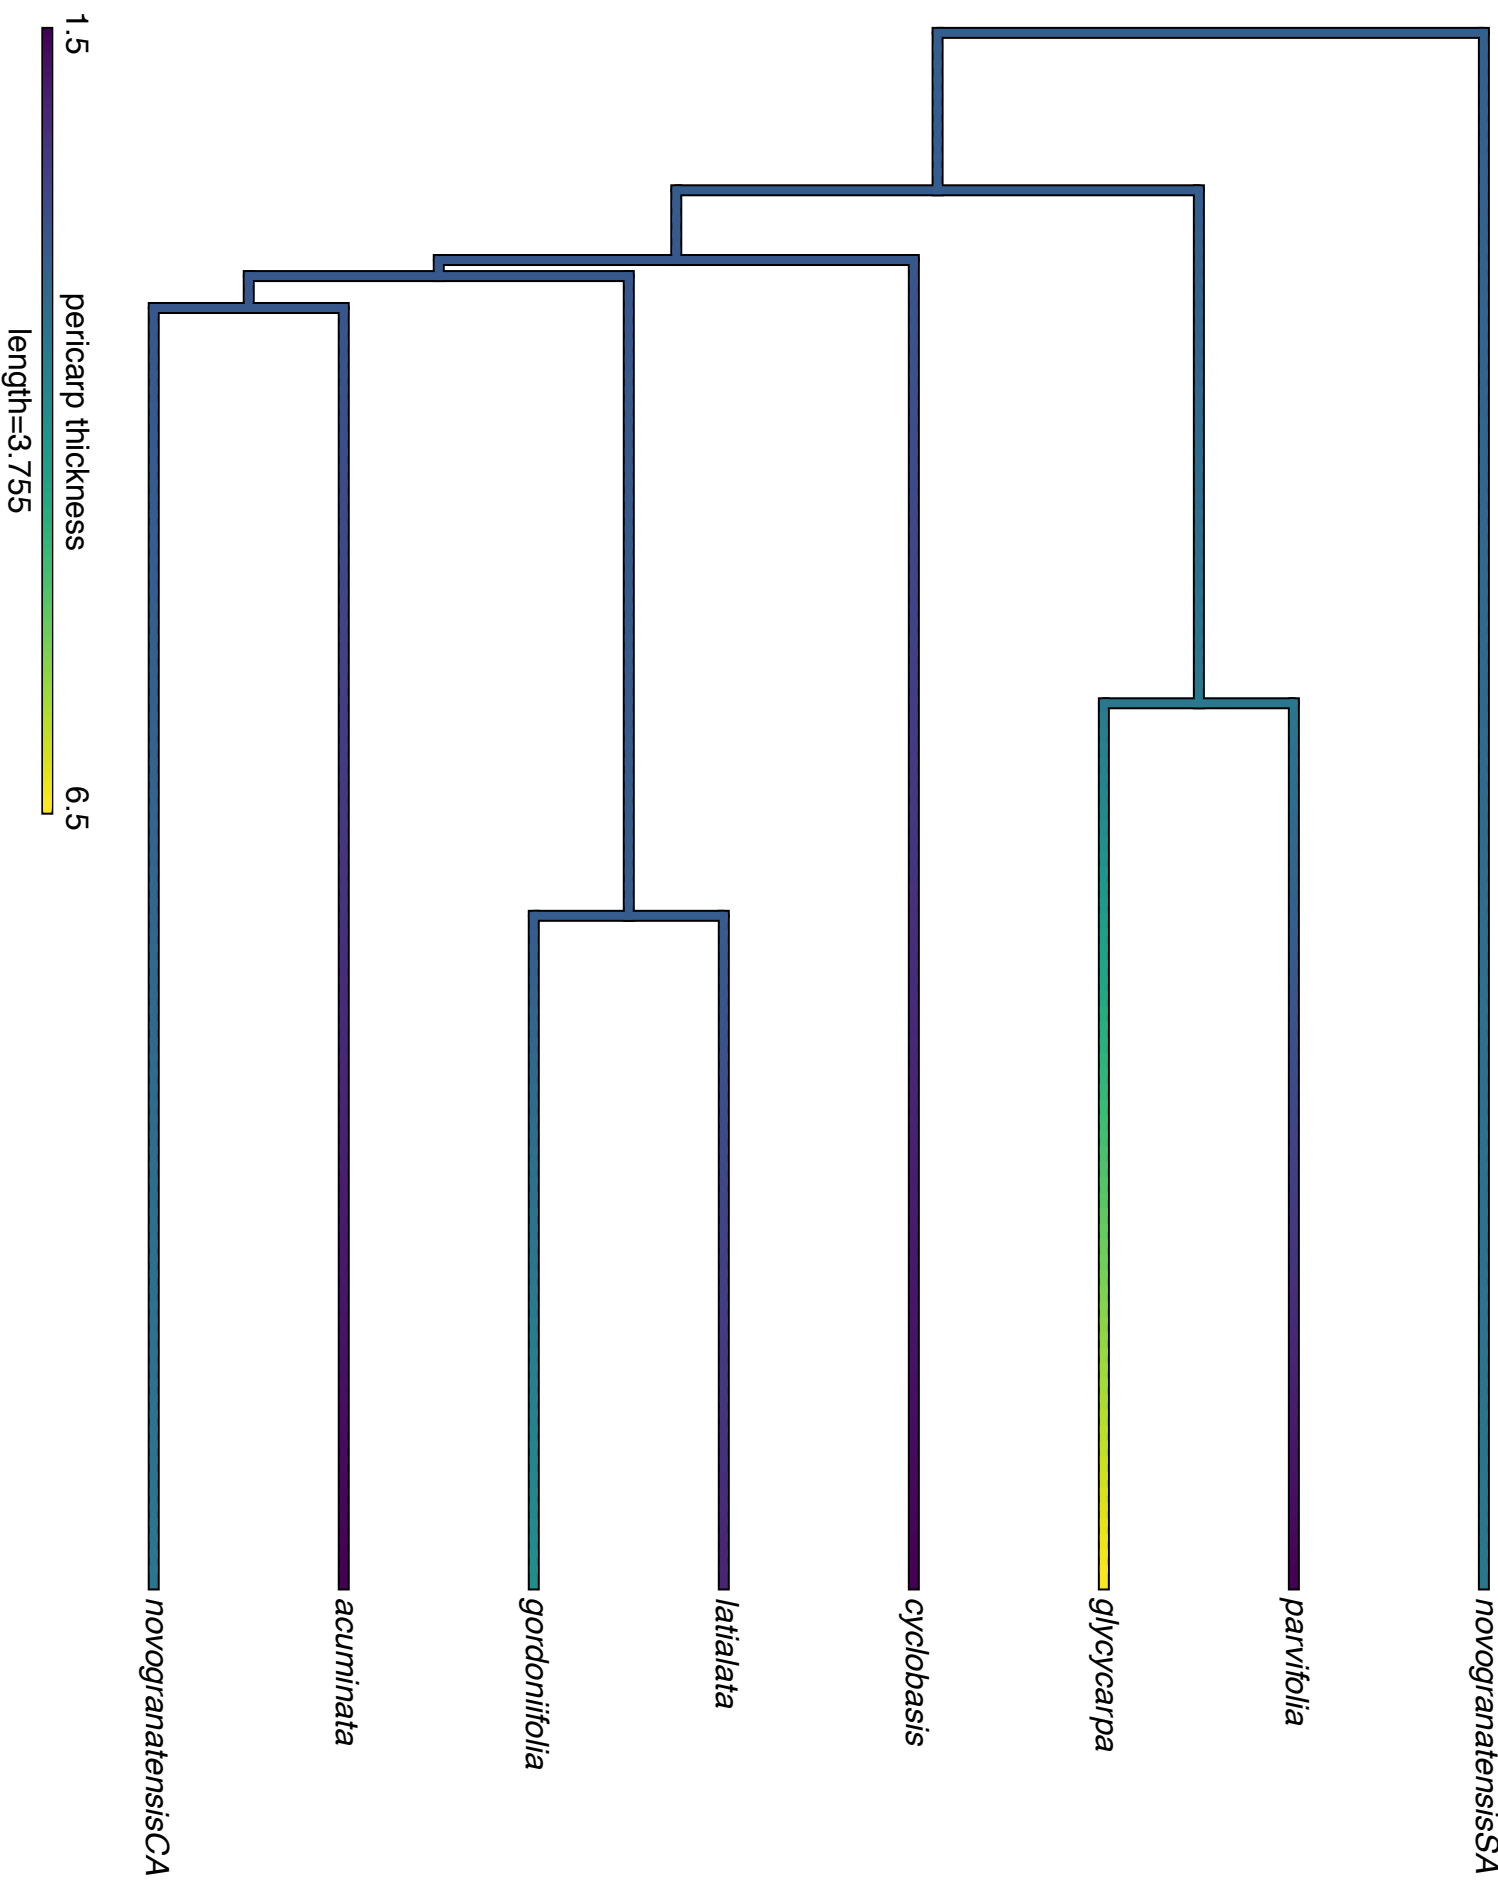

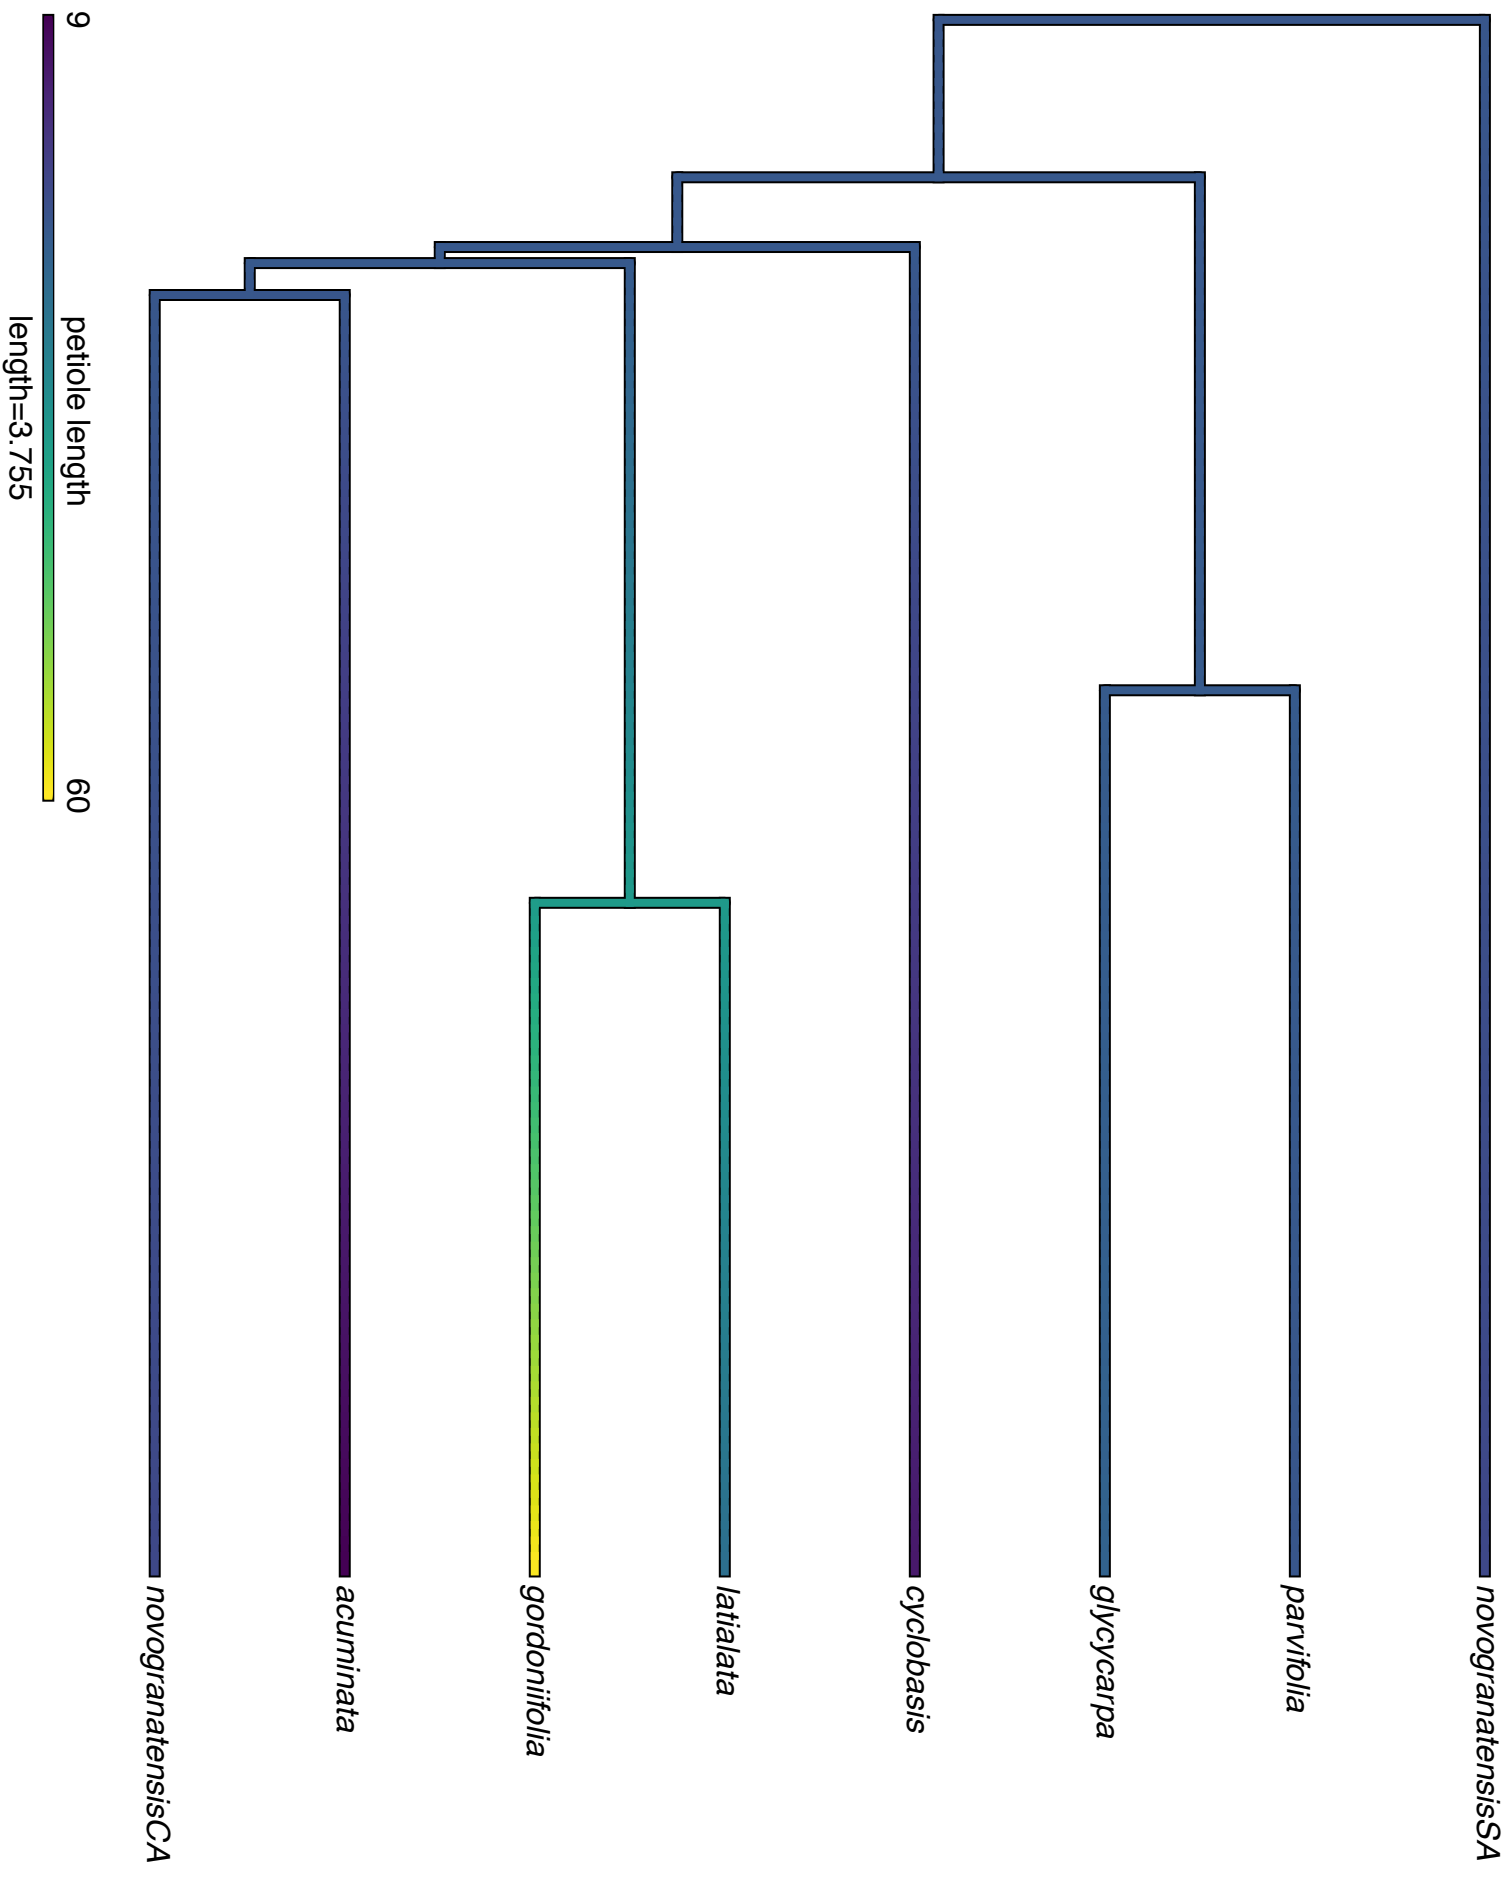



Frost et al, Appendix S30

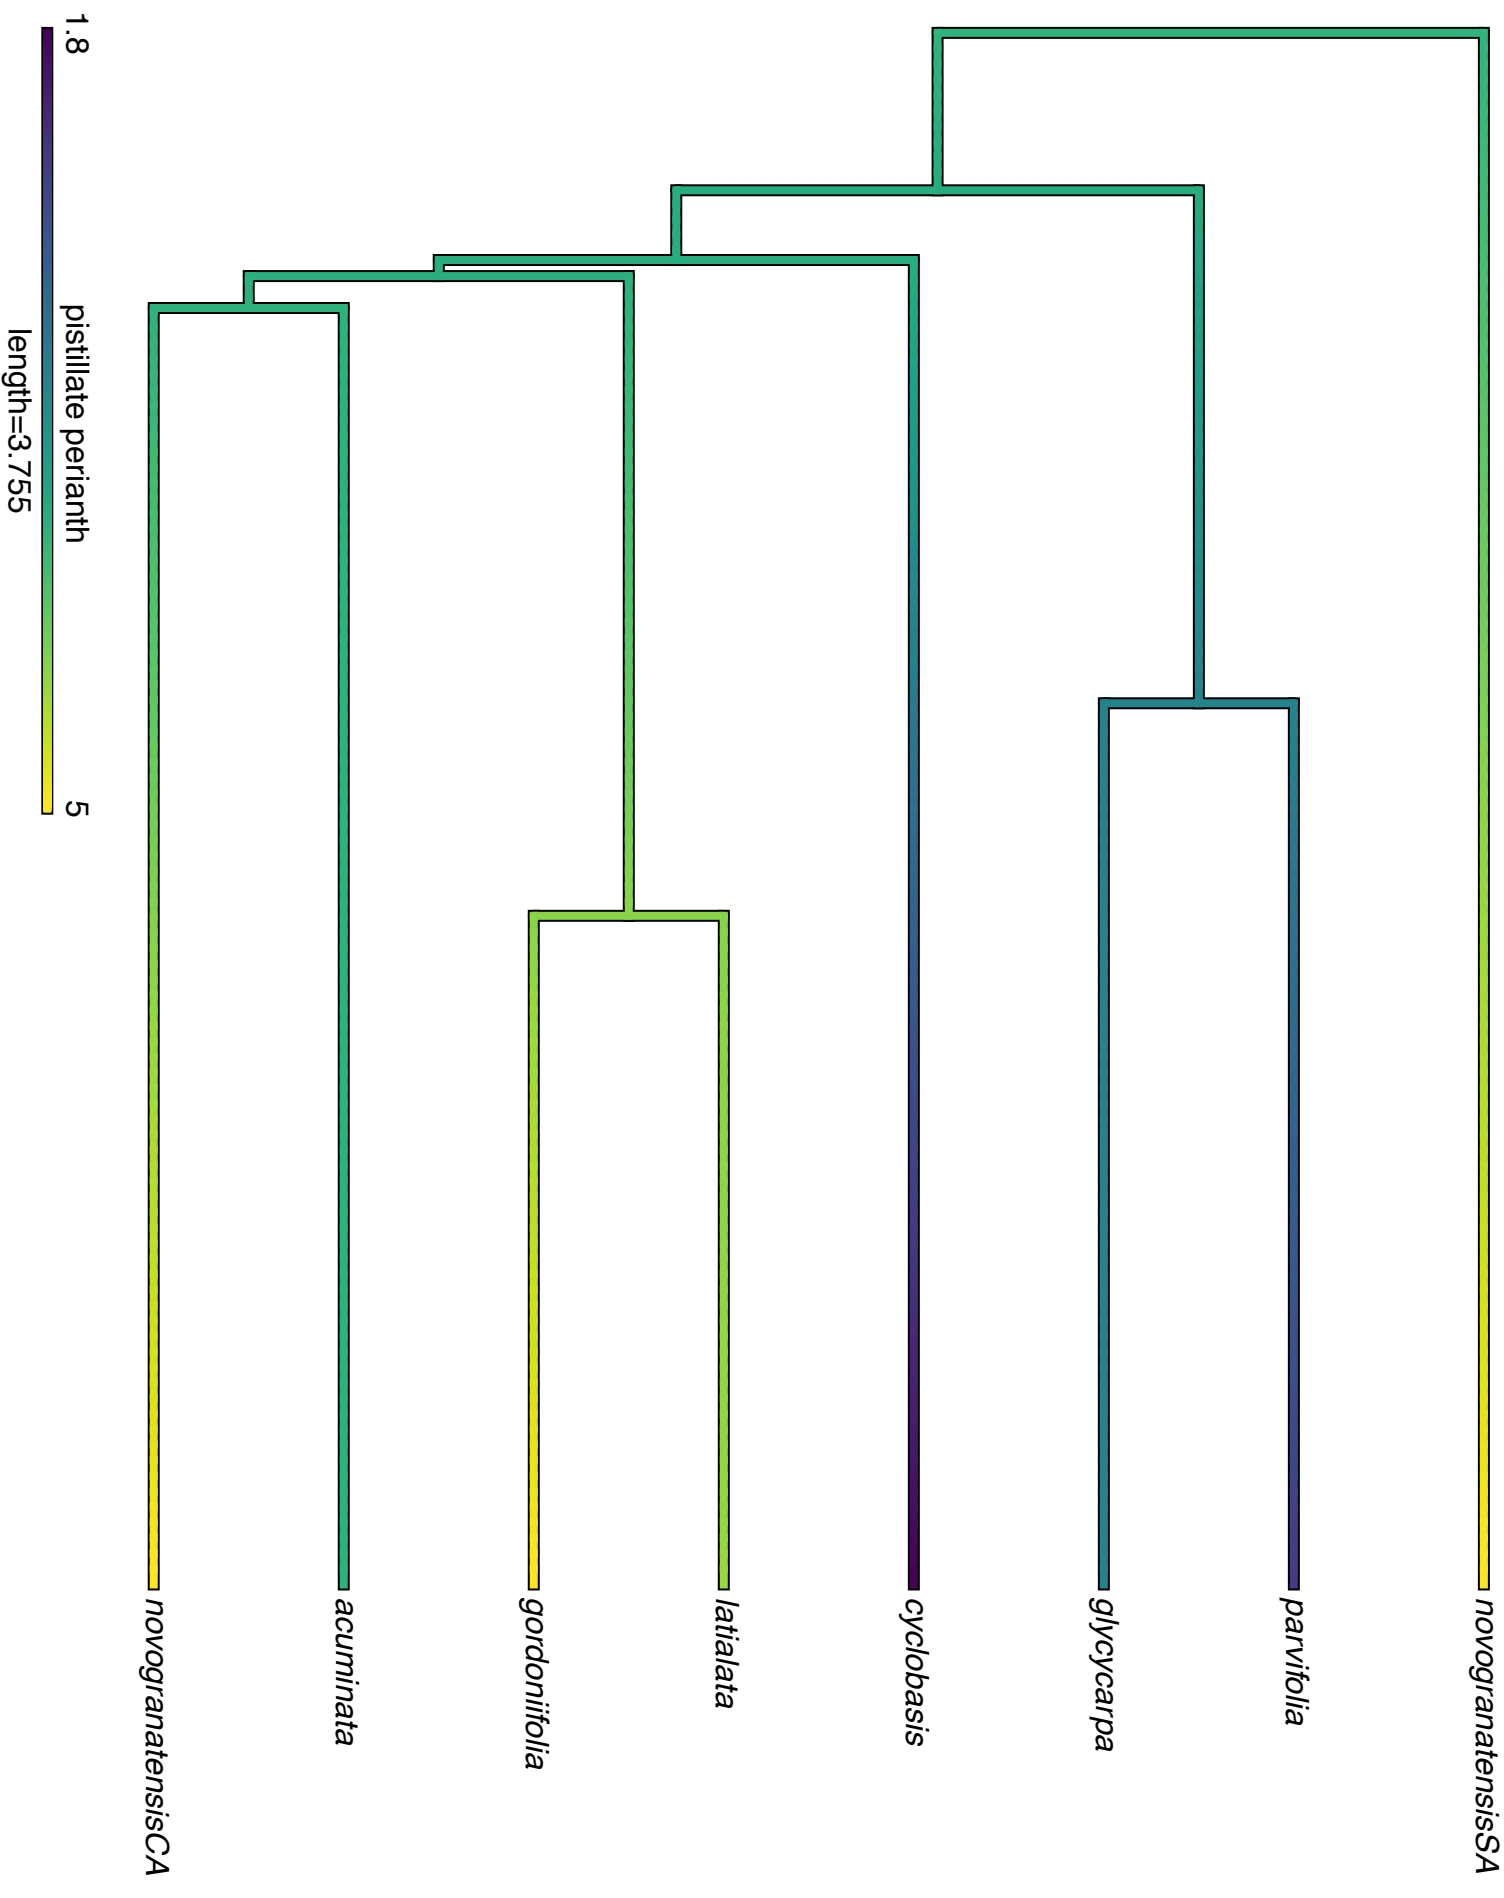

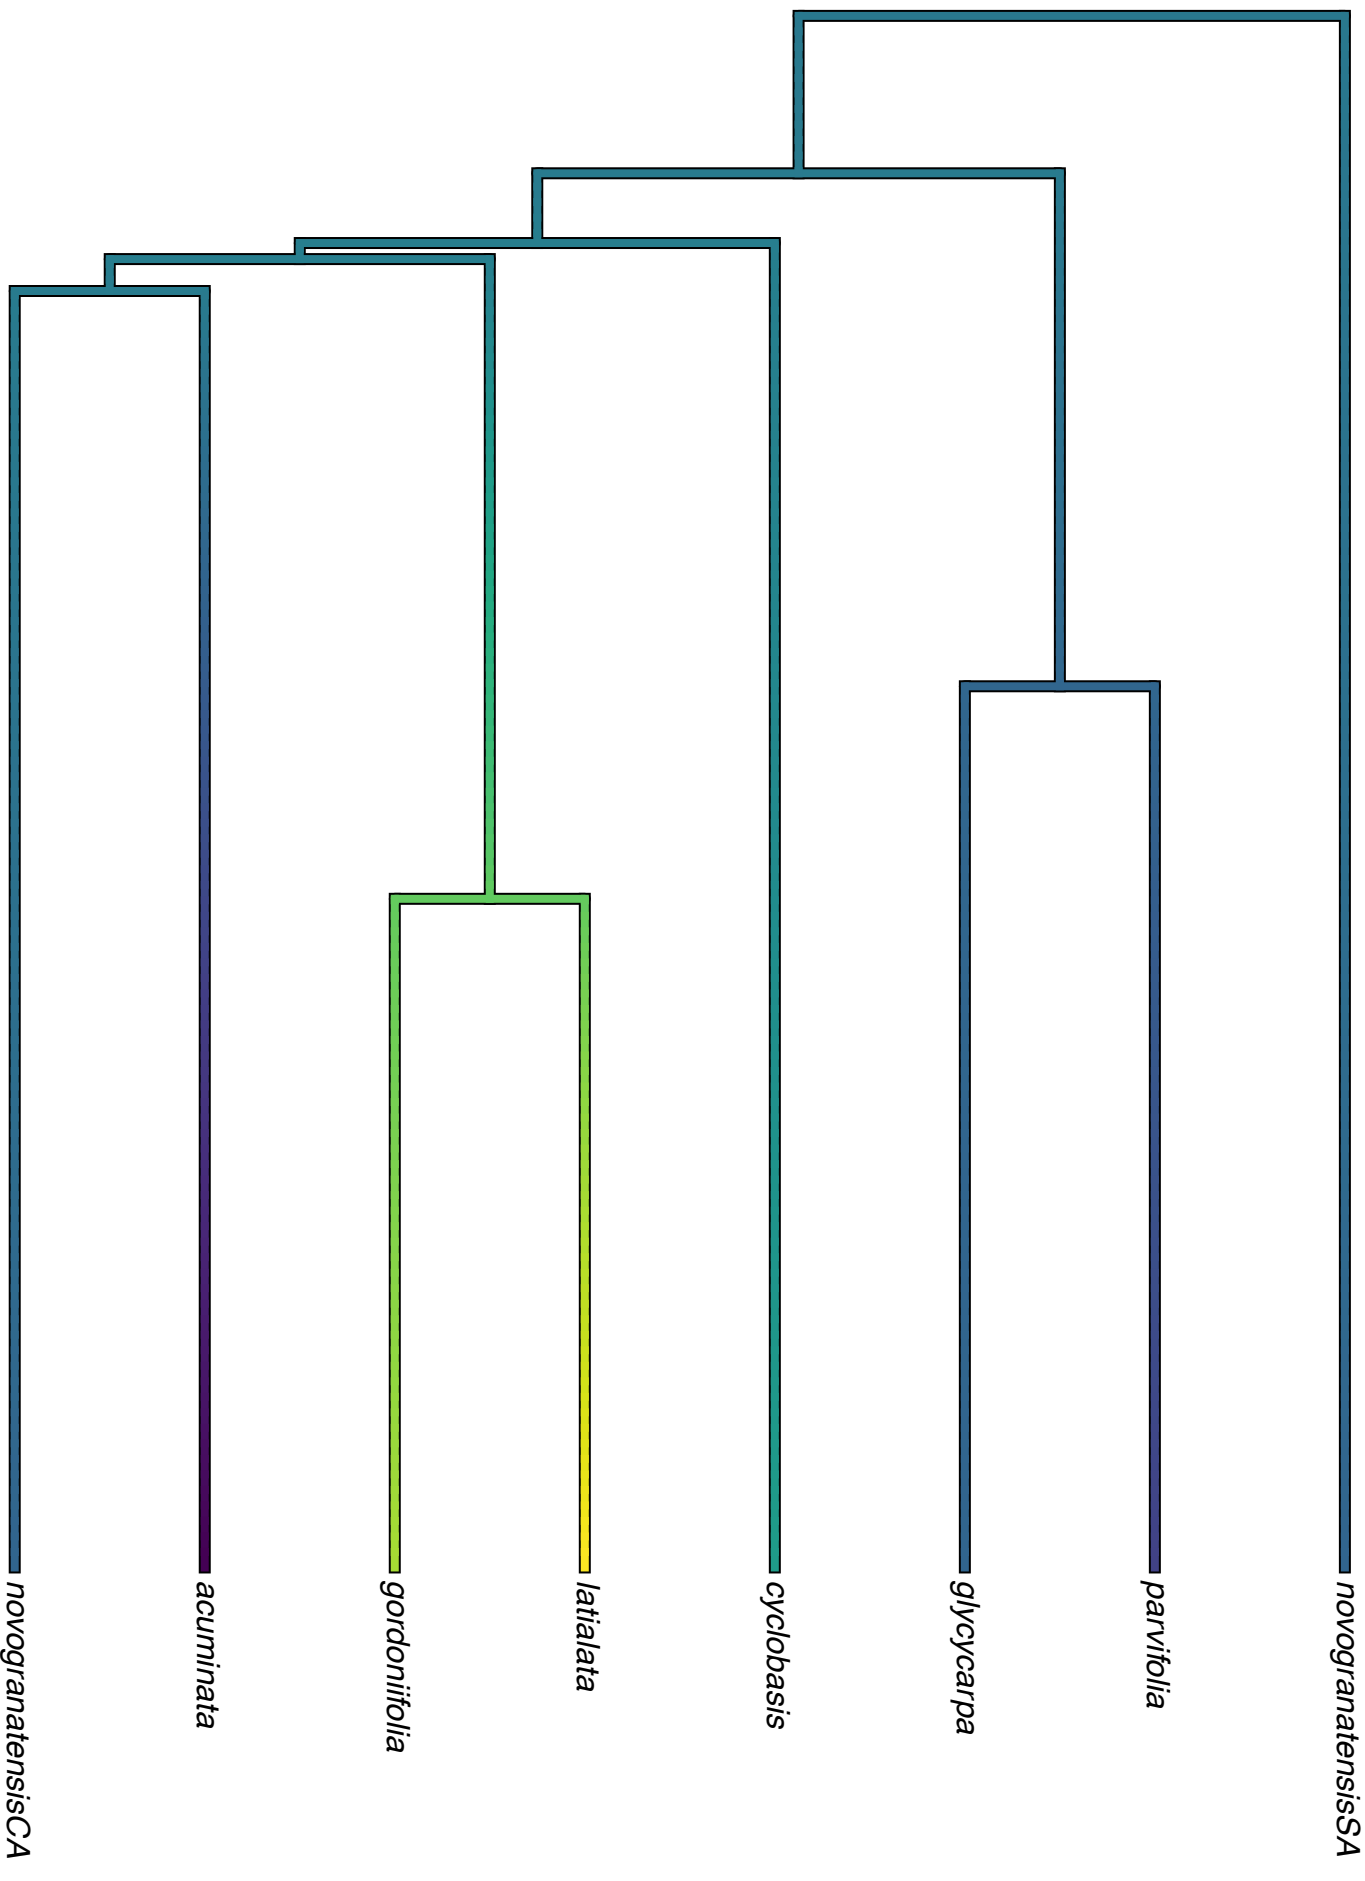

7

number of secondary veins

22.5

length=3.755

Frost et al, Appendix S32

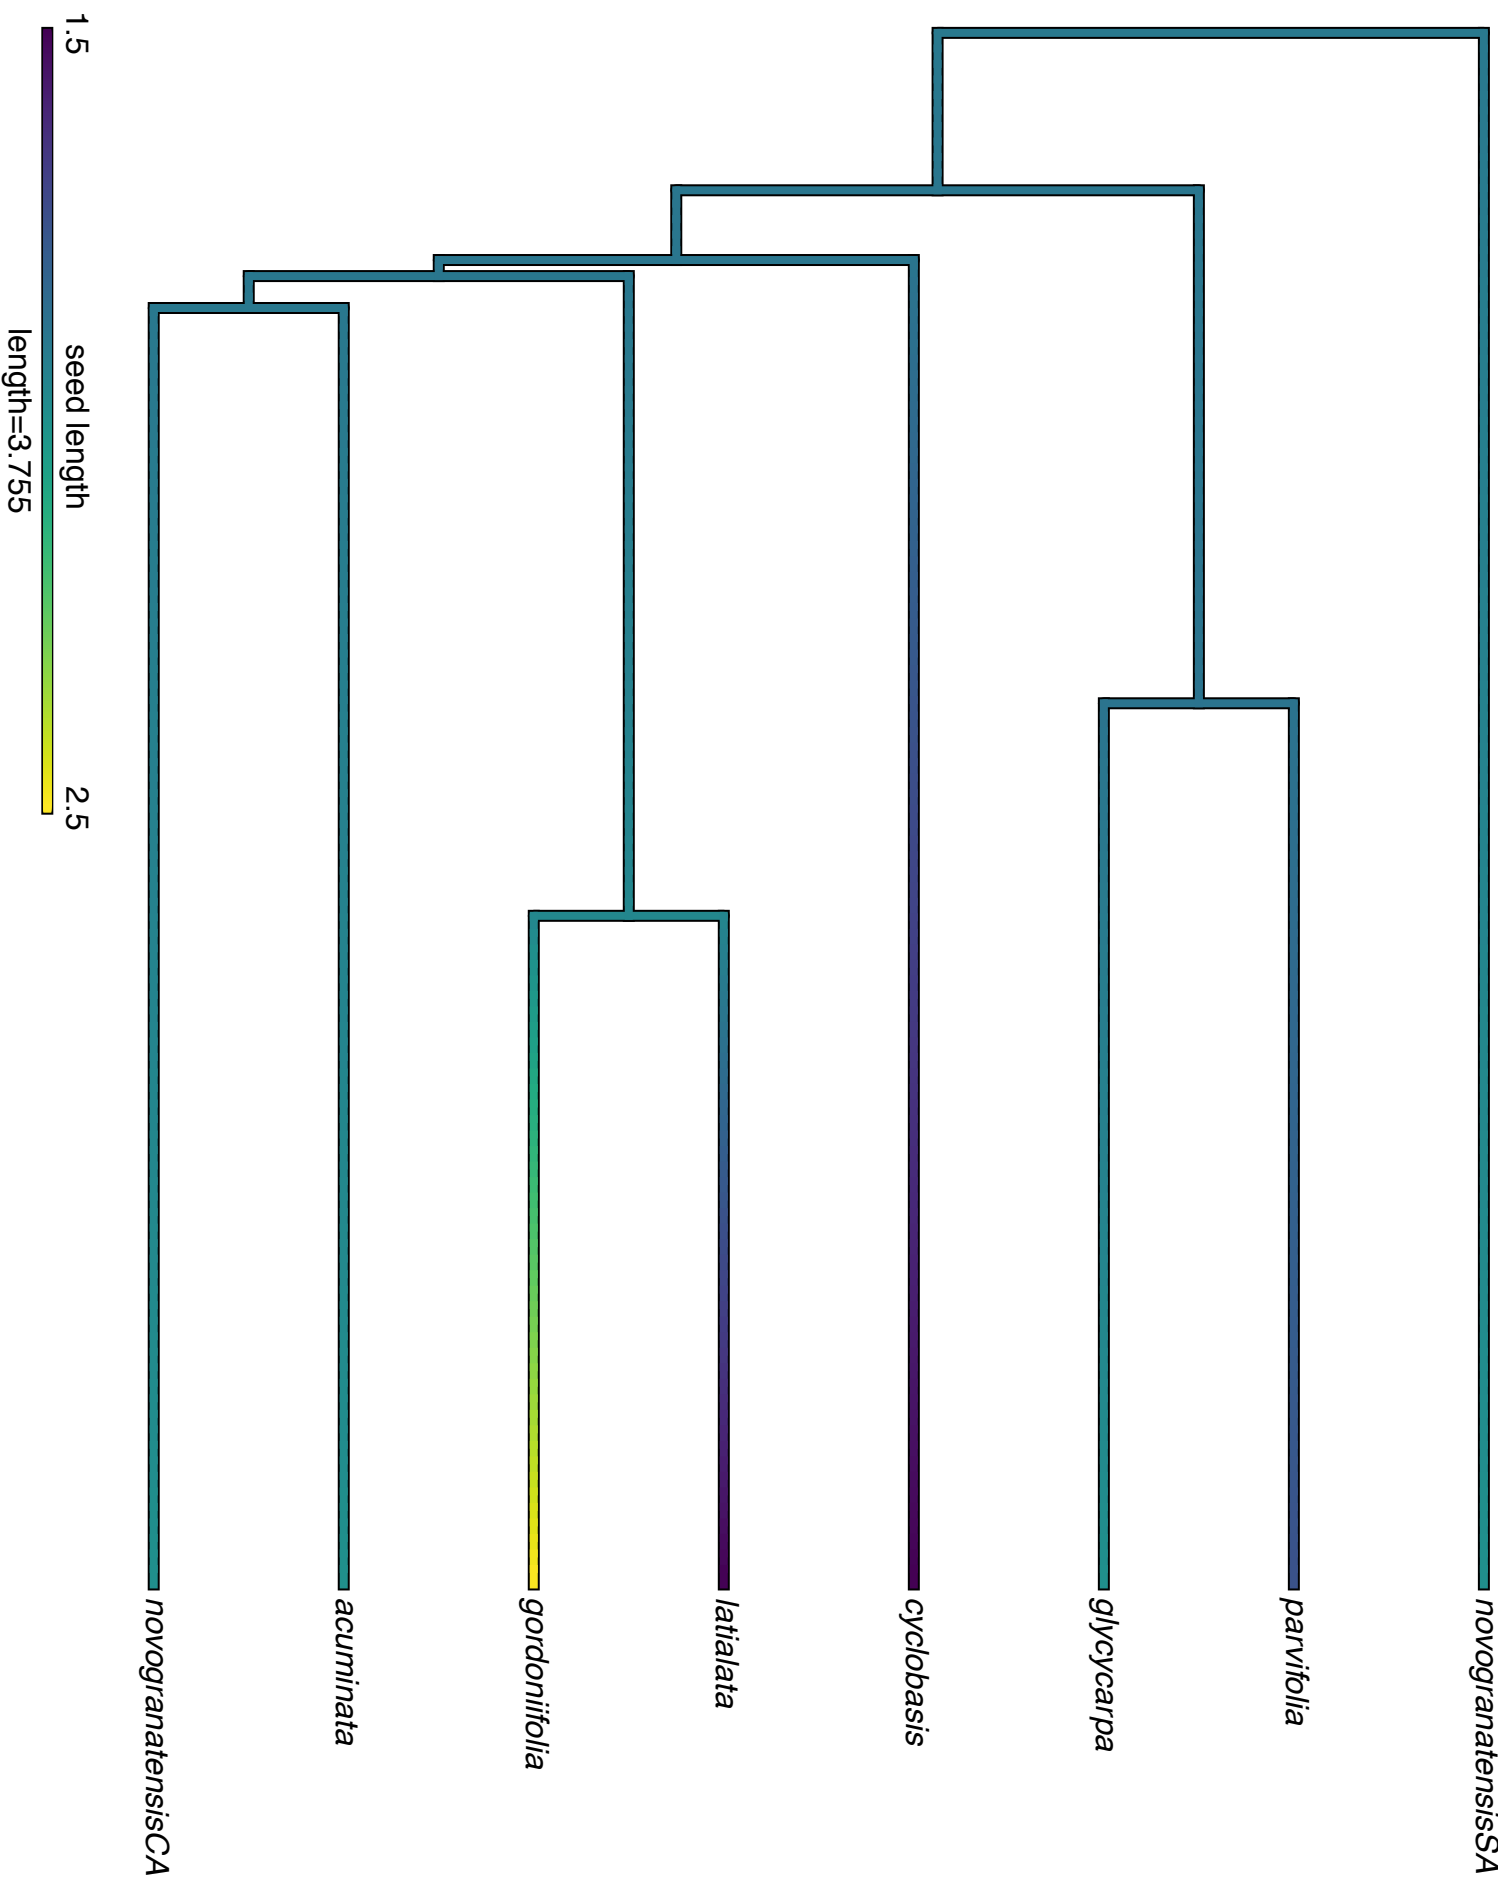

Frost et al, Appendix S33

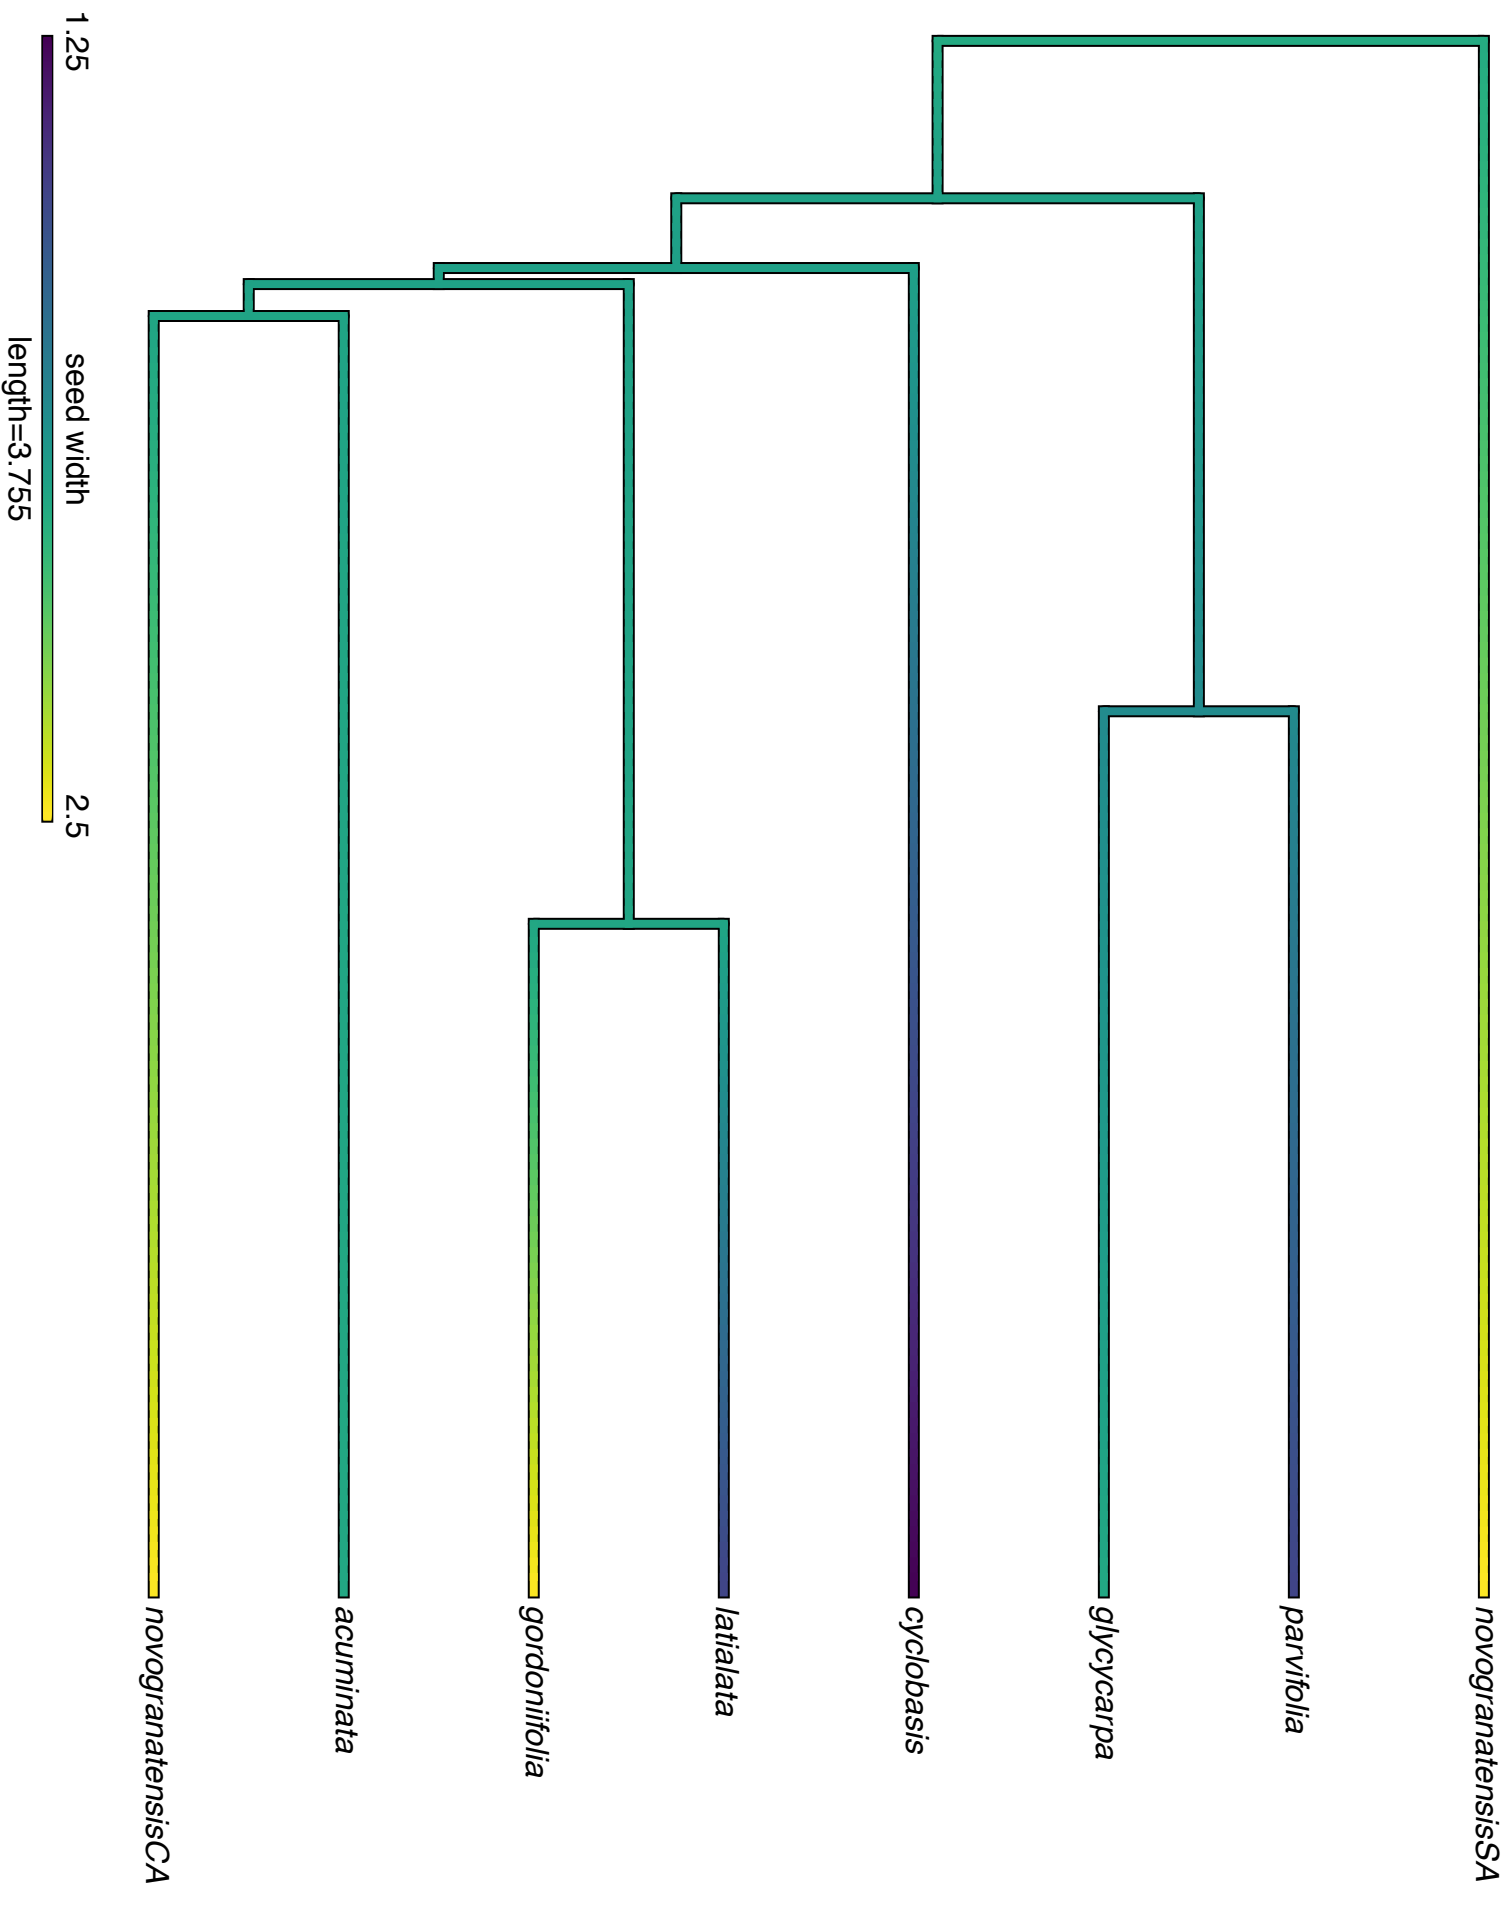

Frost et al, Appendix S34

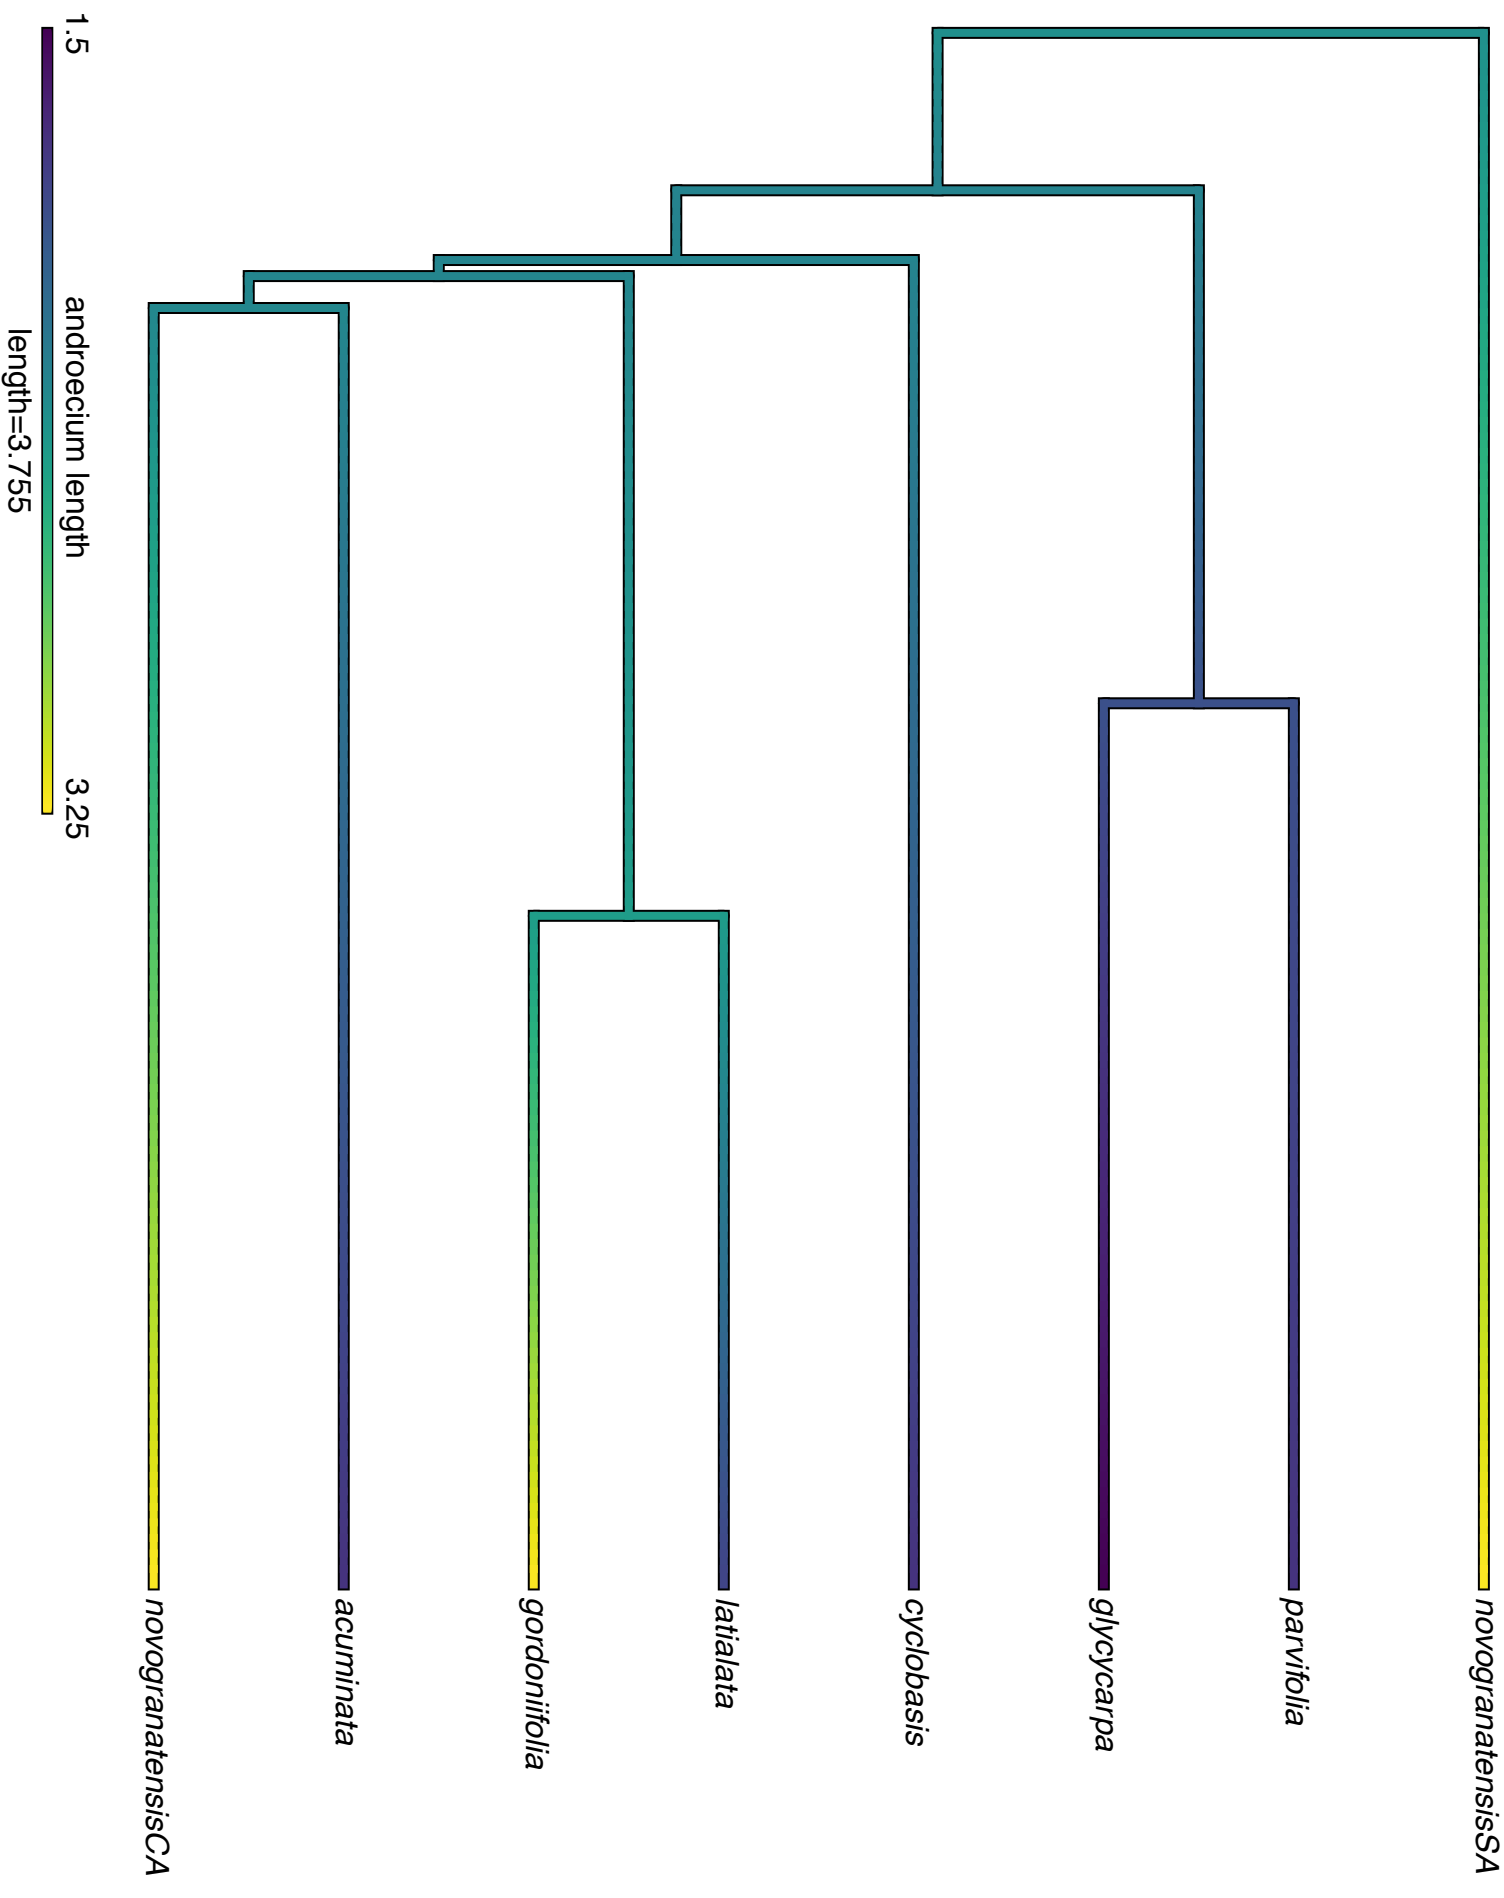

Frost et al, Appendix S35

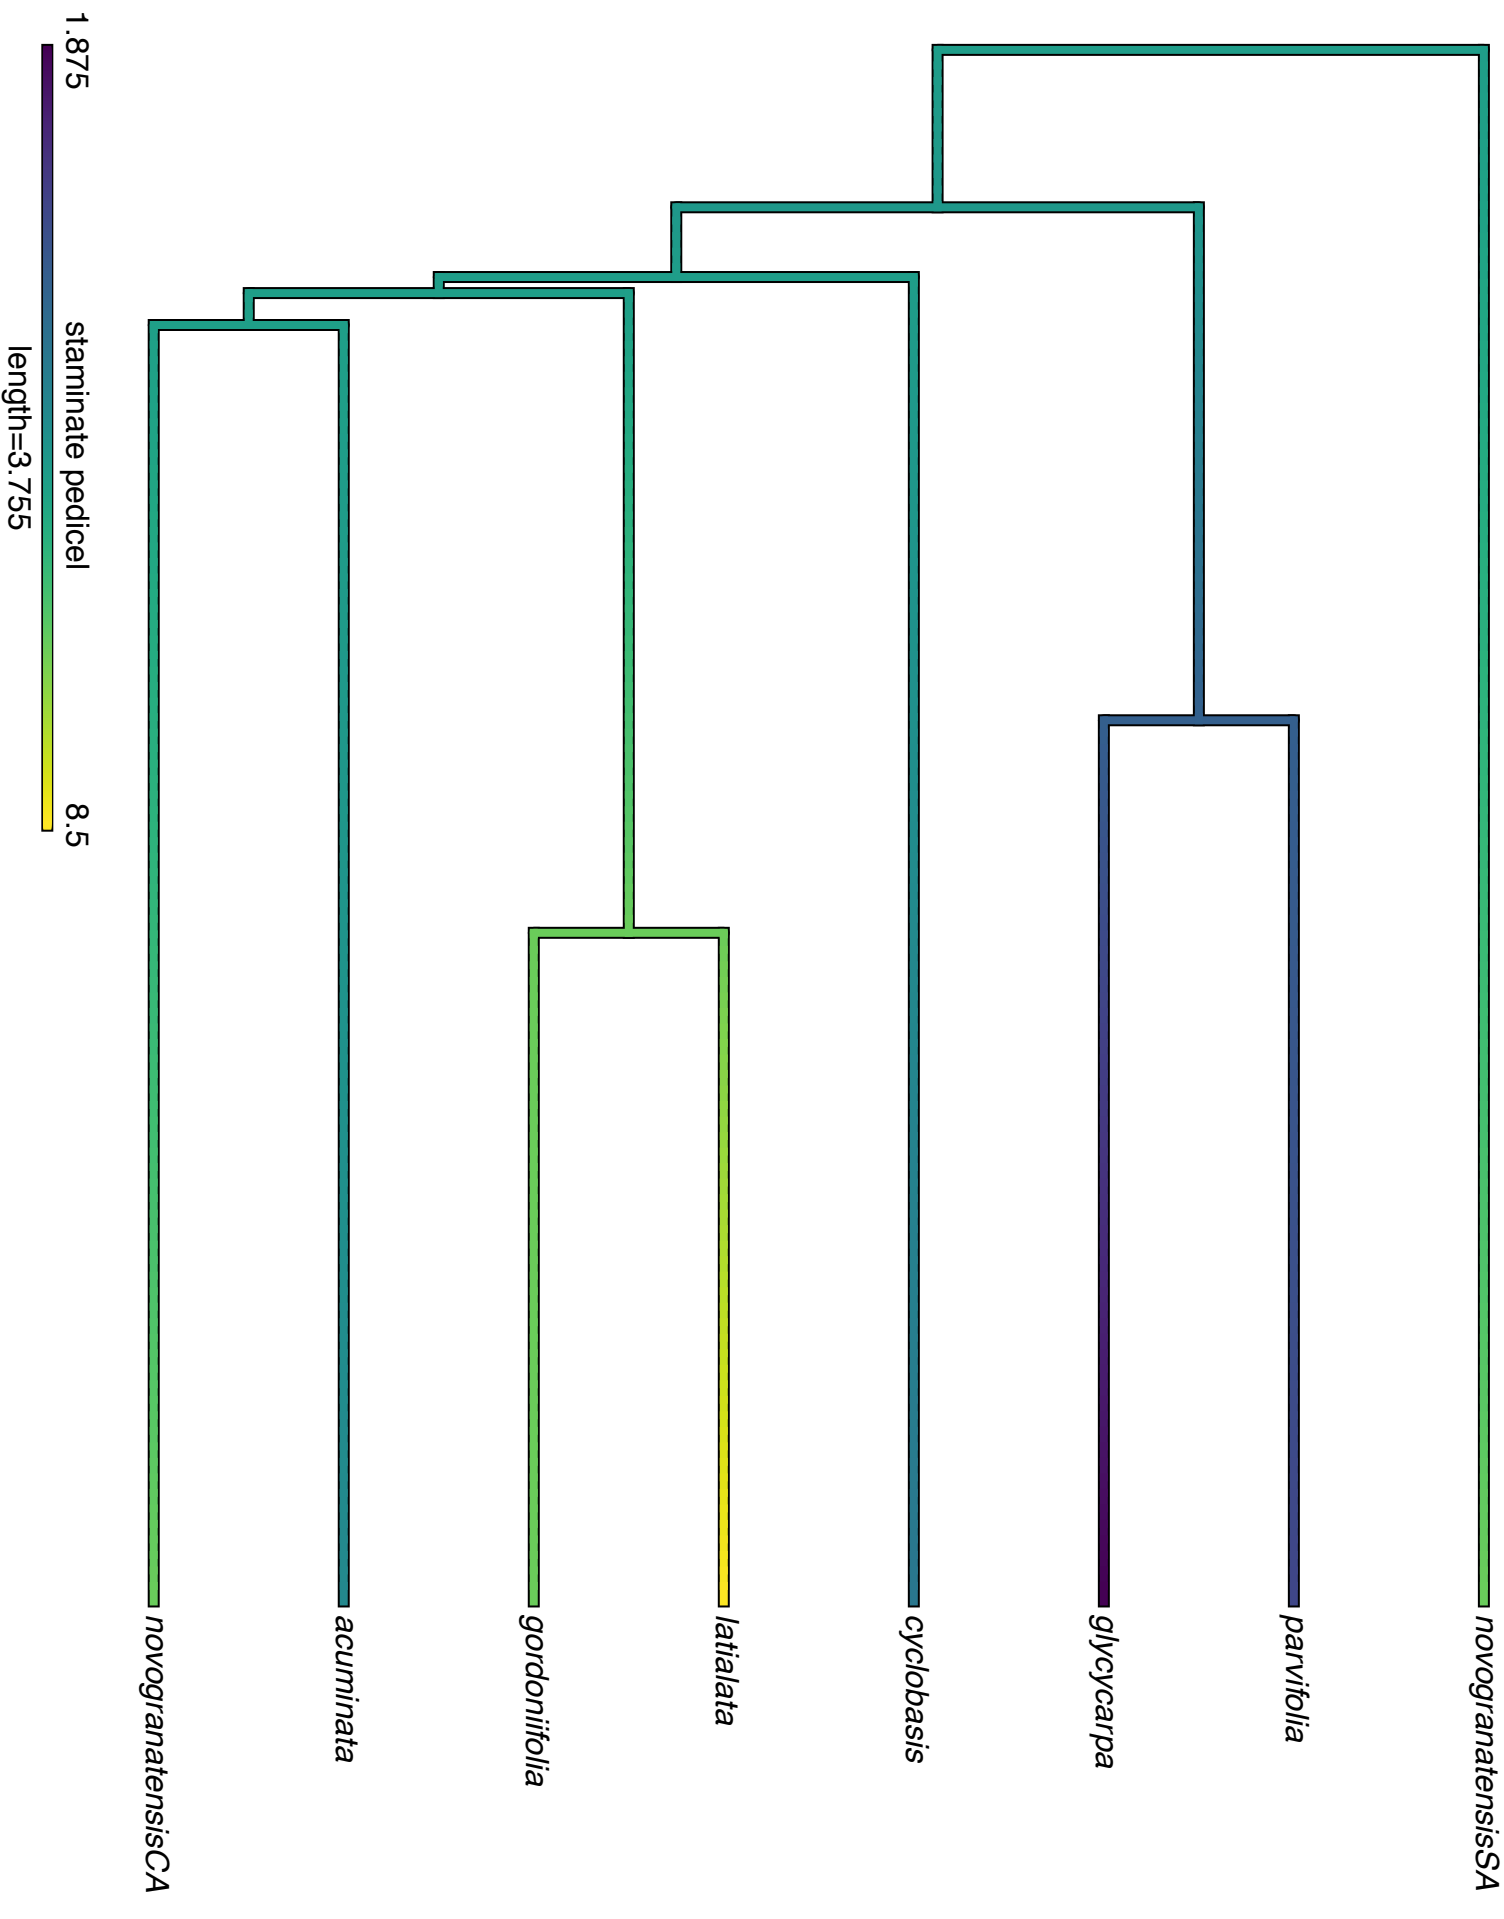

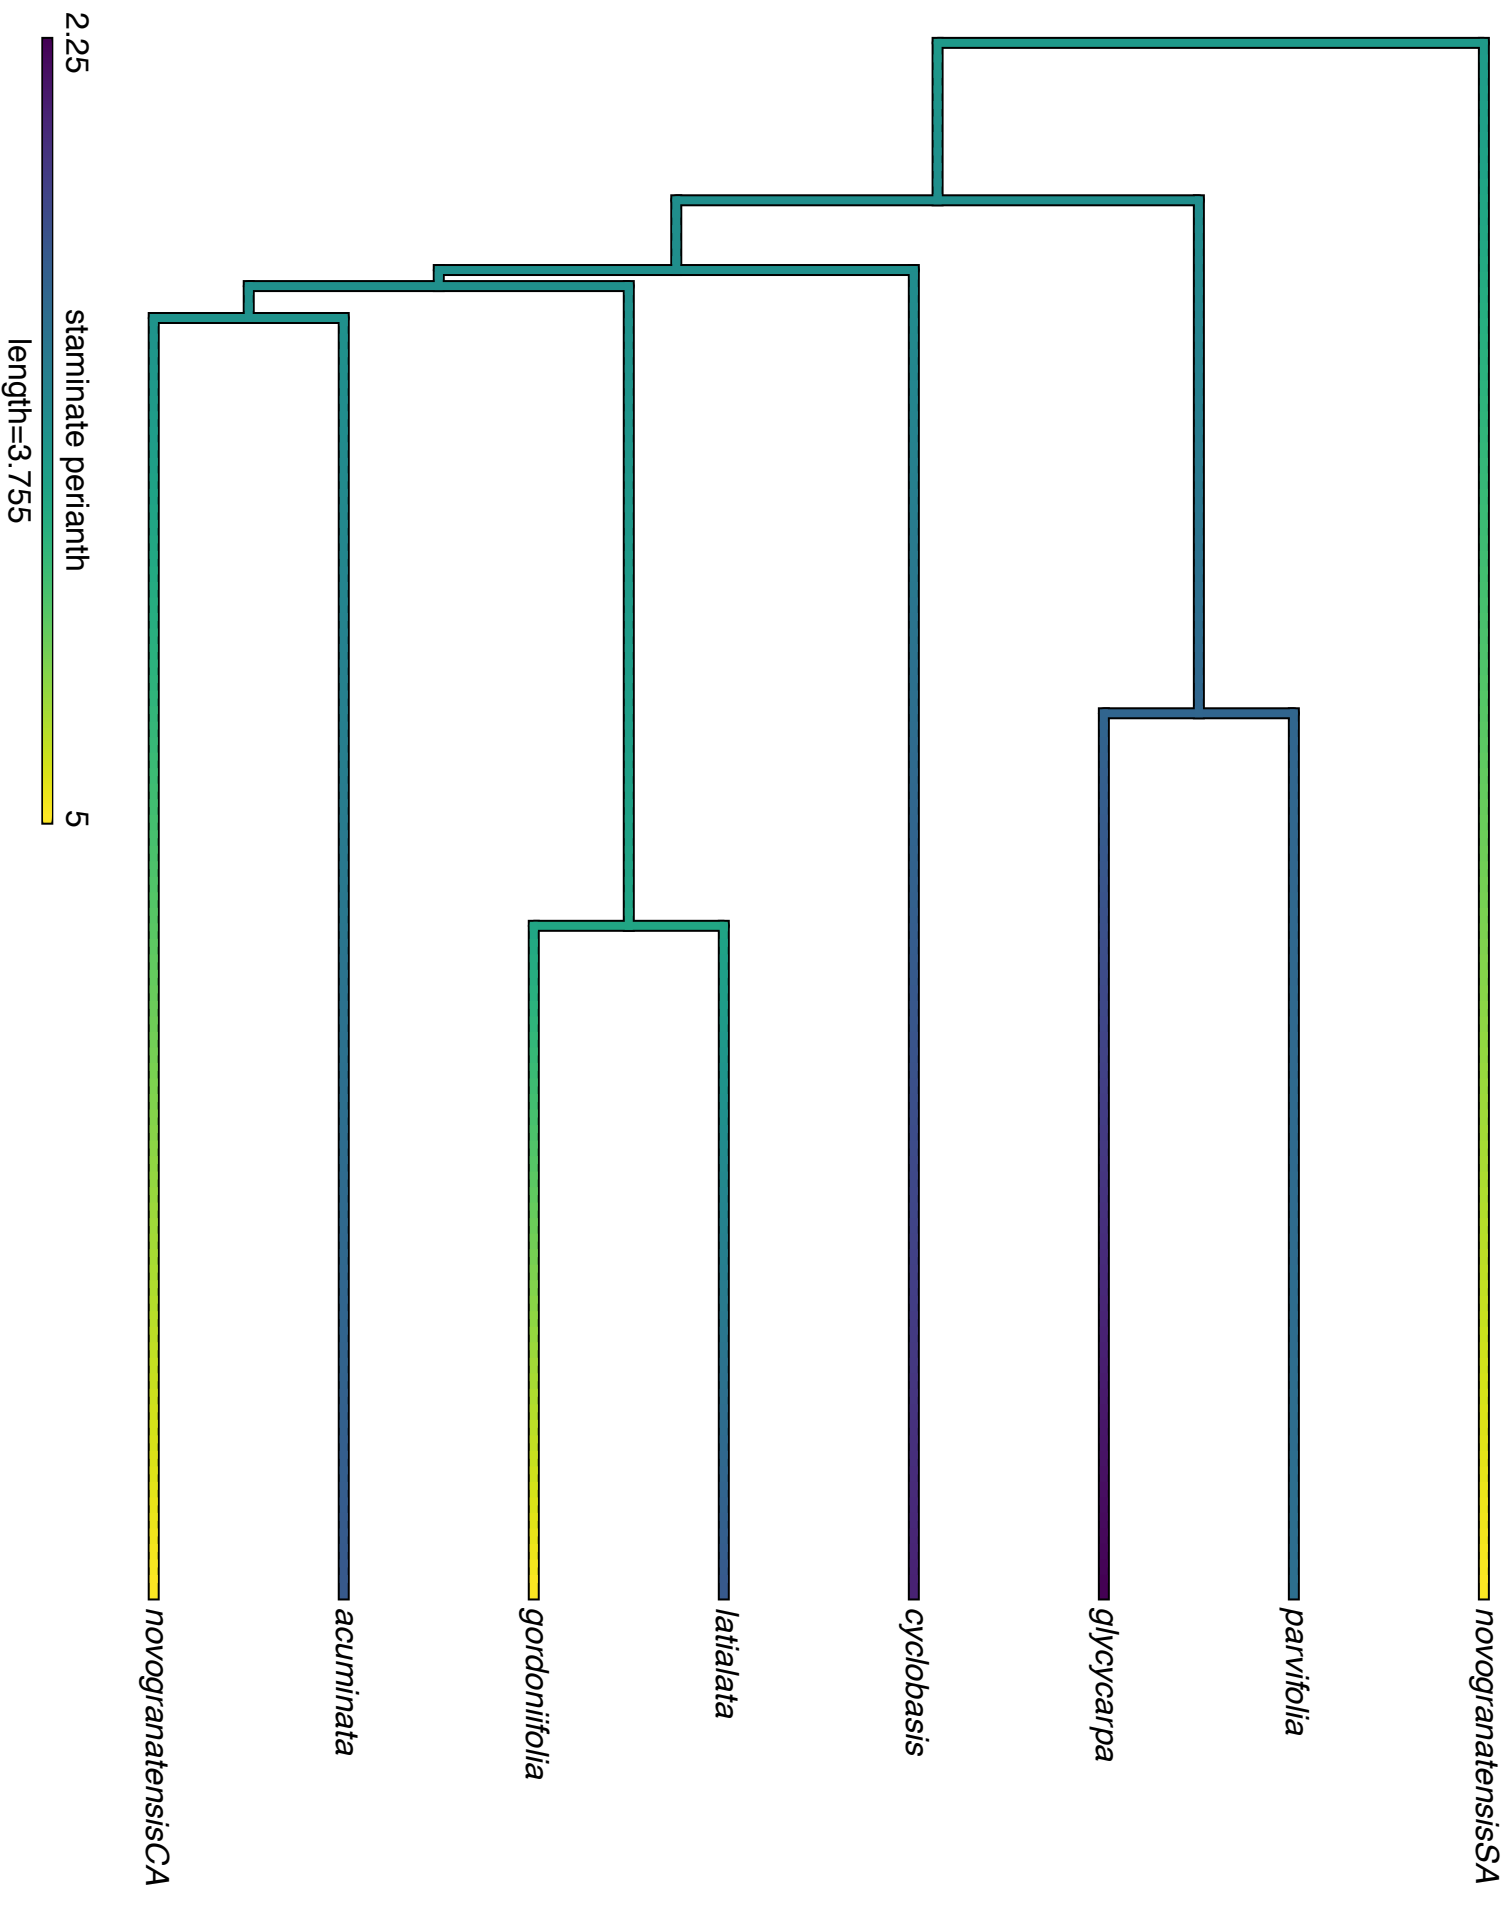

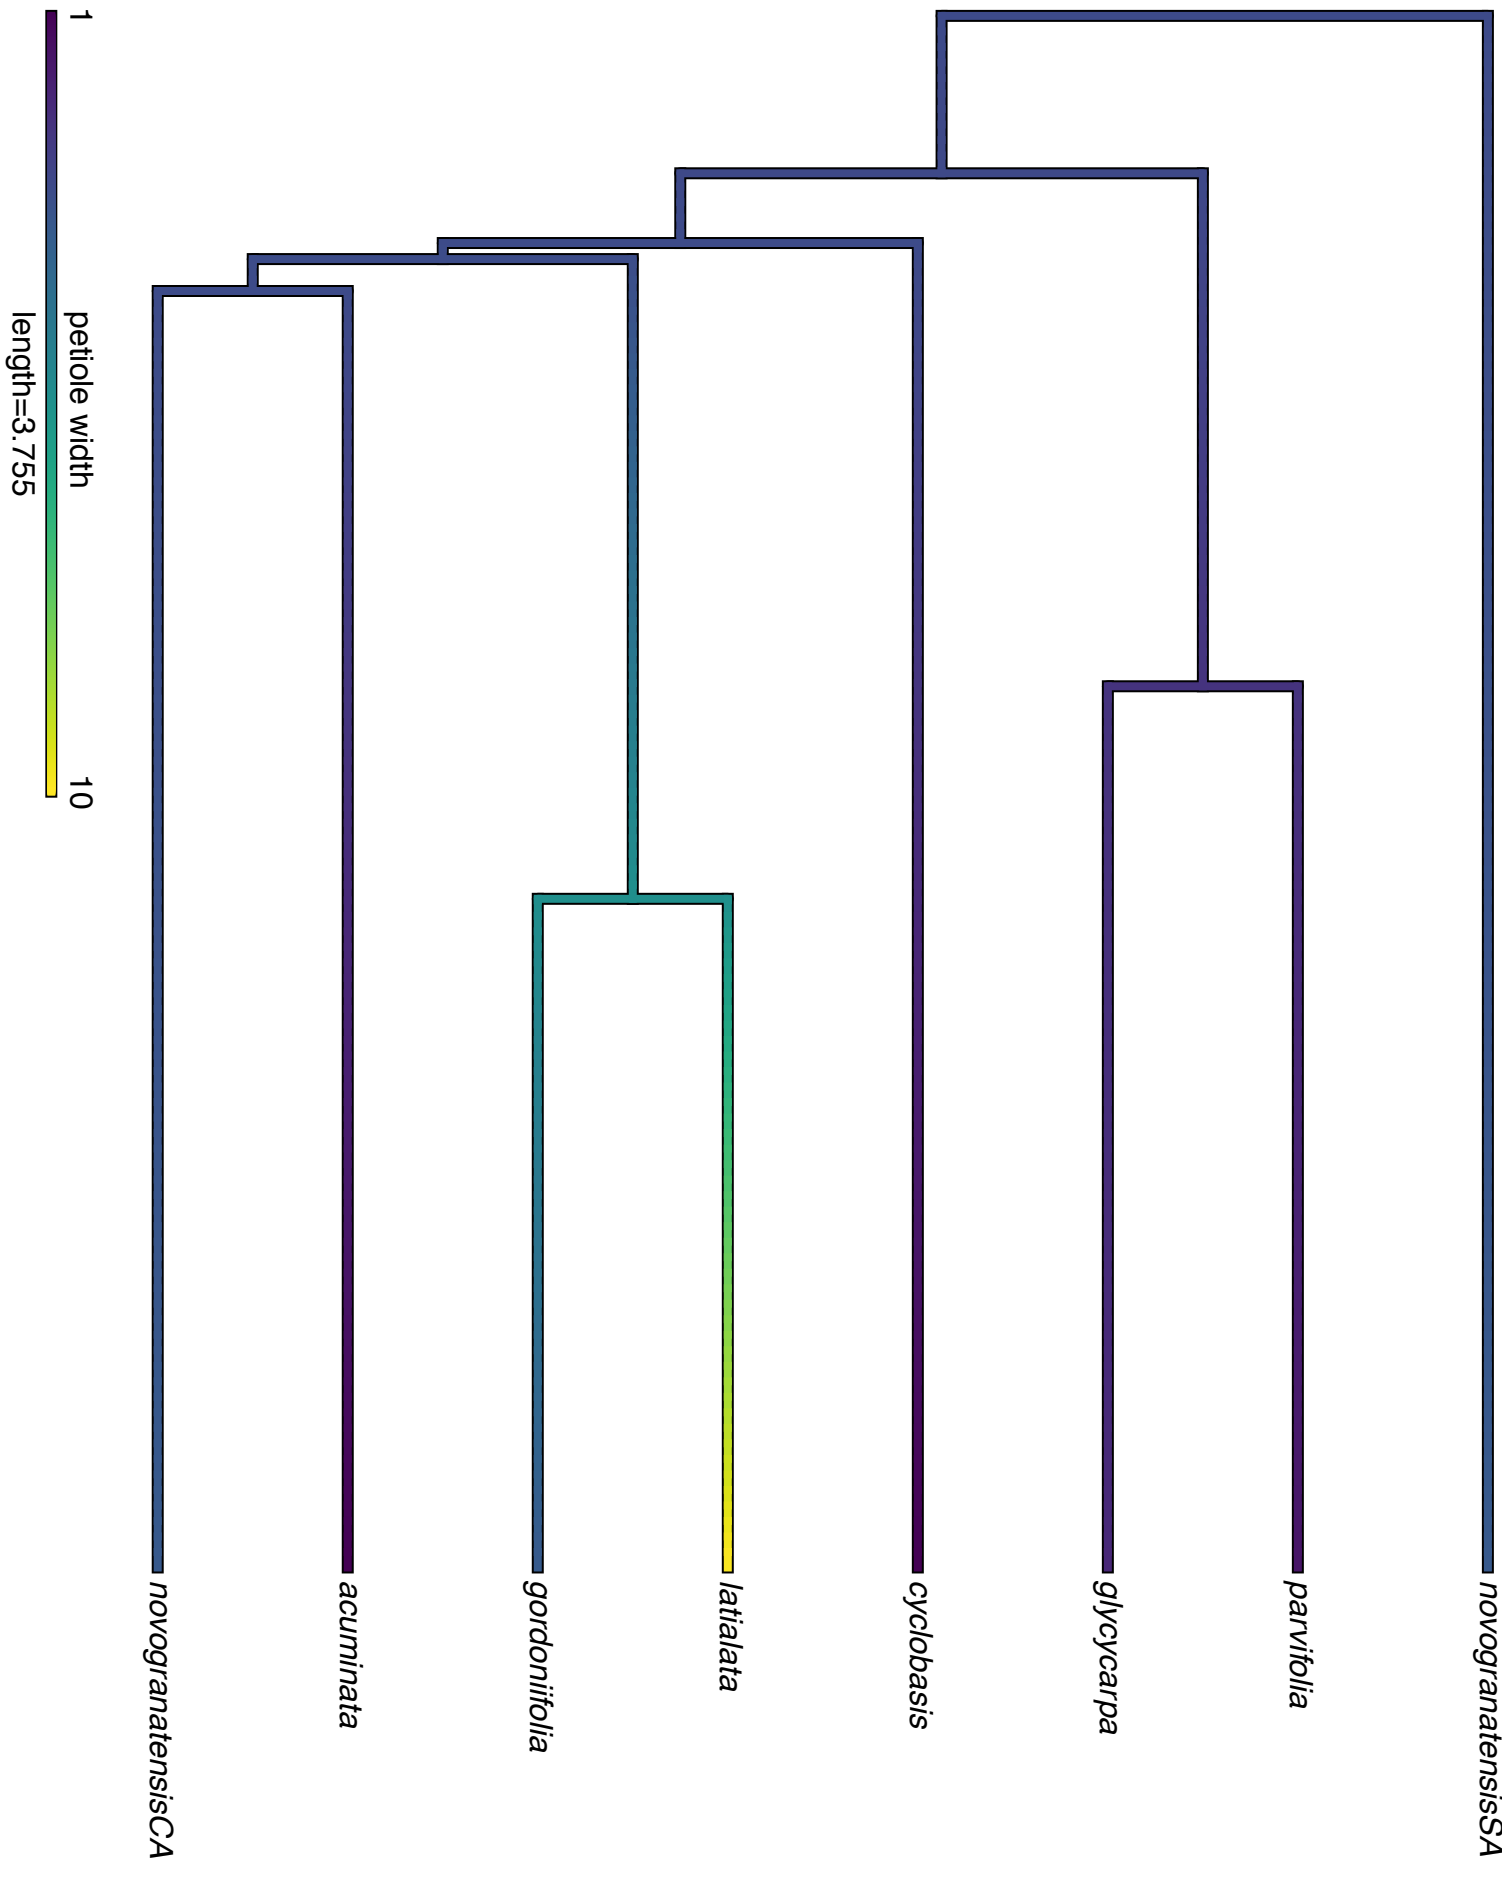

Supplement: Supplementary file [file media-1.pdf]
