# Supplementary material for: Niche evolution of the Neotropical tree genus Otoba in the context of global biogeography of the nutmeg family, Myristicaceae
Source: bioRxiv or medRxiv preprint supplement (doi:10.1101/2020.10.02.324368), 2021-09-03

**Supplementary material for:**

**Niche evolution of the Neotropical tree genus *Otoba* in the context of global biogeography of the nutmeg family, Myristicaceae**

*Running title:* Biogeography of *Otoba* and Myristicaceae

Laura Frost, Daniel A. Santamaría-Aguilar, Daisy Singletary, & Laura P. Lagomarsino<sup>1</sup>

Shirley C. Tucker Herbarium, Department of Biological Sciences, Louisiana State University,  
Baton Rouge, LA 70808, USA

<sup>1</sup>author for communication: llagomarsino1@lsu.edu

**Appendix S1.** Voucher information for *Otoba* samples, in the following format:

Sample ID; Taxon (Accepted Name); Voucher (Herbarium); Provenance; [Latitude, Longitude].

Otoba\_acuminata\_MM2720; **Otoba acuminata** (Standl.) A.H. Gentry; Mary Merello, Allison Miller & Beatriz Wong 2720 (MO); Panama; [09°13'10"N, 079°21'38"W].  
Otoba\_cyclobasis\_MT281; **Otoba cyclobasis** T.S.Jaram. & Balslev; Milton Tirado, E. Albuja & M. Chapiro 281 (MO); Ecuador; [00°43'N, 078°53'W]. Otoba\_glycycarpa\_LV25198; **Otoba glycycarpa** (Ducke) W.A.Rodrigues & T.S.Jaram.; Luis Valenzuela G., Jaime Flores, Gerry Shareva M., et al. 25198 (MO); Peru; [11°21'39"S 074°02'31"W]. Otoba\_gordoniiifolia\_RZ196; **Otoba gordoniiifolia** (A. DC.) A.H. Gentry; R.A. Zahawi 196 (MO); Ecuador; [00°05'N, 079°40'W]. Otoba\_gracilipes\_DC884; **Otoba gracilipes** (A.C. Sm.) A.H. Gentry; D. Cárdenas L. 884 (MO); Colombia; [7°26'20.0"N, 77°07'15.8"W]. Otoba\_latialata\_RC4751; **Otoba latialata** (Pittier) A.H. Gentry; R. Callejas et al. 4751 (MO); Colombia; [7°0'59.36"N, 76°18'31.52"W]. Otoba\_novogranatensis\_AG476; **Otoba novogranatensis** Moldenke; A. Grijalva, C. Aulestia & J. Taicúz 476 (MO); Ecuador; [01°02'N, 078°15'W]. Otoba\_novogranatensis\_CK681; **Otoba novogranatensis** Moldenke; C. Kernan & P. Phillips 681 (MO); Costa Rica; [08°27'N, 083°33'W]. Otoba\_novogranatensis\_EB500; **Otoba novogranatensis** Moldenke; E. Bello C. 500 (MO); Costa Rica; [10°18'36"N, 084°42'00"W]. Otoba\_novogranatensis\_GP2325; **Otoba novogranatensis** Moldenke; G. A. Tipaz, P. Méndez, H. Vargas & M. Chapiro 2325 (MO); Ecuador; [00°45'N, 078°47'W]. Otoba\_novogranatensis\_LG20482; **Otoba novogranatensis** Moldenke; L. D. Gómez P., R. L. Liesner & E. J. Judziewicz 20482 (MO); Costa Rica; [09°38'24"N, 082°48'30"W]. Otoba\_novogranatensis\_WP16081; **Otoba novogranatensis** Moldenke; W. A. Palacios & M. Tirado 16081 (MO); Ecuador; [00°45'N, 078°56'W]. Otoba\_novogranatensis\_WS36336; **Otoba novogranatensis** Moldenke; W. D. Stevens & O. M. Montiel J. 36336 (MO); Nicaragua; [12°17'36"N, 085°05'58"W]. Otoba\_parvifolia\_DN9151; **Otoba parvifolia** (Markgr.) A.H.Gentry; D. A. Neill, F. Hurtado & A. A. Alvarado 9151 (MO); Ecuador, Napo; [00°36'S, 077°23'W]. Otoba\_parvifolia\_MN37243; **Otoba parvifolia** (Markgr.) A.H.Gentry; M. H. Nee 37243 (MO); Bolivia; [17°39'S, 063°43'W] Otoba\_parvifolia\_MS1182; **Otoba parvifolia** (Markgr.) A.H.Gentry; M.S. Silveira 1182 (MO); Brazil, Acre; [08°17'48"S, 071°08'36"W]. Otoba\_parvifolia\_RV19070; **Otoba parvifolia** (Markgr.) A.H.Gentry; R. Vásquez & R. Apanú 19070 (MO); 08 September 1994; Peru, Amazonas, Condorcanqui; 320 m; [04°51'S, 078°18'W]. Otoba\_sp\_nov\_JP16902; **n/a**; J. J. Pipoly, III, Á. Cogollo P. et al. 16902 (MO); Colombia; [06°29'N, 076°14'W]. Otoba\_sp\_nov\_RC5752; **n/a**; R. Callejas, R. Fonnegra G., F. J. Roldán & A. L. Arbeláez 5752 (MO); Colombia; [07°20'N, 076°30'W]. Otoba\_vespertilio\_GM12543; **Otoba vespertilio** D. Santam. & J.E. Jiménez; Gordon McPherson 12543 (MO); Panama; [08°47'03"N, 082°10'52"W].

## Appendix S2. Myristicaceae GenBank accession numbers

| Species                            | matK     | rbcl     | ndhF     |
|------------------------------------|----------|----------|----------|
| <i>Ambavia gerrardii</i>           | AY220435 | -        | AY218168 |
| <i>Anaxagorea acuminata</i>        | AY220436 | -        | AY218169 |
| <i>Annickia kummeriae</i>          | AY238961 | -        | -        |
| <i>Annona muricata</i>             | -        | -        | AY218170 |
| <i>Artabotrys hexapetalus</i>      | AY238962 | -        | -        |
| <i>Asimina triloba</i>             | AY220437 | -        | AY218171 |
| <i>Brochoneura acuminata</i>       | AY220442 | -        | AY218179 |
| <i>Cananga odorata</i>             | AY220438 | -        | AY218172 |
| <i>Cassytha filiformis</i>         | -        | -        | -        |
| <i>Cephalosphaera usambarensis</i> | AY220443 | -        | AY218180 |
| <i>Coelocaryon oxycarpum</i>       | AY220444 | -        | AY218181 |
| <i>Compsonera atopa</i>            | EU090469 | EU090508 | -        |
| <i>Compsonera capitellata</i>      | EU090473 | EU090509 | -        |
| <i>Compsonera debilis</i>          | EU090475 | EU090514 | -        |
| <i>Compsonera excelsa</i>          | EU090482 | EU090518 | -        |
| <i>Compsonera mutisii</i>          | EU090496 | EU090532 | -        |
| <i>Compsonera sprucei</i>          | AY220445 | EU090539 | AY218182 |
| <i>Compsonera ulei</i>             | EU090505 | EU090541 | -        |
| <i>Degeneria roseiflora</i>        | AY220440 | -        | AY218174 |
| <i>Gymnacranthera contracta</i>    | MH332593 | -        | -        |
| <i>Gymnacranthera forbesii</i>     | MH332622 | -        | -        |
| <i>Horsfieldia amygdalina</i>      | KR530941 | KR529438 | -        |
| <i>Horsfieldia amygdalina</i>      | MF547527 | -        | -        |
| <i>Horsfieldia grandis</i>         | MH332620 | -        | -        |
| <i>Horsfieldia kingii</i>          | KR530945 | KR529441 | -        |
| <i>Horsfieldia pandurifolia</i>    | NC042225 | NC042225 | NC042225 |
| <i>Horsfieldia polyspherula</i>    | KJ708961 | MG817045 | -        |
| <i>Horsfieldia prainii</i>         | KR530951 | KR529444 | -        |
| <i>Horsfieldia pulcherrima</i>     | MG816907 | MG817055 | -        |
| <i>Horsfieldia punctatifolia</i>   | AY220448 | -        | AY218184 |
| <i>Horsfieldia subglobosa</i>      | MH332591 | -        | -        |
| <i>Iryanthera hostmanni</i>        | AY220449 | JQ625774 | AY218185 |
| <i>Iryanthera sagotiana</i>        | FJ514645 | JQ625975 | -        |
| <i>Isolona campanulata</i>         | AY238963 | -        | -        |
| <i>Knema cinerea</i>               | KJ708967 | KJ594758 | -        |
| <i>Knema elegans</i>               | KR530962 | KR529456 | -        |
| <i>Knema furfuracea</i>            | KR530963 | KR529457 | -        |
| <i>Knema globularia</i>            | AB924868 | KR529464 | -        |
| <i>Knema hookeriana</i>            | KJ708968 | KJ594760 | -        |
| <i>Knema laurina</i>               | AY220450 | KJ594761 | AY218186 |
| <i>Knema lenta</i>                 | KR530973 | KR529465 | -        |

|                                  |          |          |          |
|----------------------------------|----------|----------|----------|
| <i>Knema linifolia</i>           | KR530976 | KR529470 | -        |
| <i>Knema patentinervia</i>       | KJ708971 | KJ594762 | -        |
| <i>Knema tenuinervia</i>         | KR530977 | KR529476 | -        |
| <i>Malmea dielsiana</i>          | AY238964 | AY238955 | -        |
| <i>Mauloutchia chapelieri</i>    | AY220451 | AF197594 | AY218187 |
| <i>Michelia audiaei</i>          | MN990580 | MN990580 | MN990580 |
| <i>Myristica andamanica</i>      | MF547528 | MF158638 | -        |
| <i>Myristica beddomei</i>        | MF547537 | MF186600 | -        |
| <i>Myristica cinnamomea</i>      | KJ709010 | KJ594811 | -        |
| <i>Myristica fragrans</i>        | KT445278 | AF206798 | AY218188 |
| <i>Myristica gigantea</i>        | MG816899 | MG817047 | -        |
| <i>Myristica malabarica</i>      | MF547530 | KY945260 | -        |
| <i>Osteophloeum platyspermum</i> | JQ626371 | JQ625884 | -        |
| <i>Polyalthia suberosa</i>       | AY220439 | -        | -        |
| <i>Pycnanthus angolensis</i>     | AY220453 | -        | AY218189 |
| <i>Staudtia gabonensis</i>       | KC627785 | KC628454 | -        |
| <i>Staudtia kamerunensis</i>     | KC627748 | KC628429 | -        |
| <i>Uvaria afzelii</i>            | AY238966 | -        | -        |
| <i>Virola koschnyi</i>           | EU669473 | JQ592895 | -        |
| <i>Virola kwatae</i>             | FJ514688 | JQ626043 | -        |
| <i>Virola multiflora</i>         | GQ982125 | GQ981913 | -        |
| <i>Virola nobilis</i>            | GQ982126 | GQ981914 | -        |
| <i>Xylopia peruviana</i>         | AY238967 | -        | -        |

**Appendix S3.** Summary of sequence data recovered for each sample for targeted and off-target (cpDNA) loci. Asterisks at sample names indicate samples that were not included in any phylogenetic analysis. Samples for which there was insufficient cpDNA data to include in phylogenetic analyses are marked with “n/a”.

| Sample                                | Mean sequence length (bp) | # of loci | Length of ungapped cpDNA (bp) | Collection year | Annual precipitation (mm) |
|---------------------------------------|---------------------------|-----------|-------------------------------|-----------------|---------------------------|
| <i>Otoba acuminata</i> _MM2720        | 209.25                    | 4         | 39,553                        | 2001            | 3,021                     |
| <i>Otoba cyclobasis</i> _MT281        | 183.9                     | 73        | 3,399                         | 1993            | 2,265                     |
| <i>Otoba glycyarpa</i> _LV25198       | 227.88                    | 96        | 32,401                        | 2013            | 1,842                     |
| <i>Otoba gordoniiifolia</i> _RZ196    | 206.51                    | 61        | 20,318                        | 1996            | 1,933                     |
| <i>Otoba gracilipes</i> _DC884*       | 192                       | 2         | n/a                           | 1987            | 3,065                     |
| <i>Otoba latialata</i> _RC4751        | 244.39                    | 142       | 42,374                        | 1987            | 2,610                     |
| <i>Otoba novogranatensis</i> _AG476   | 102                       | 1         | 3,533                         | 1993            | 3,048                     |
| <i>Otoba novogranatensis</i> _CK681   | 174                       | 2         | 13,653                        | 1988            | 3,499                     |
| <i>Otoba novogranatensis</i> _EB500*  | 208.91                    | 11        | n/a                           | 1988            | 3,524                     |
| <i>Otoba novogranatensis</i> _GP2325  | 186.75                    | 4         | 41,378                        | 1992            | 2,057                     |
| <i>Otoba novogranatensis</i> _LG20482 | 299.92                    | 157       | 111,863                       | 1983            | 3,244                     |
| <i>Otoba novogranatensis</i> _WP16081 | 90                        | 1         | 47,902                        | 1993            | 2,326                     |
| <i>Otoba novogranatensis</i> _WS36336 | 457.56                    | 217       | n/a                           | 2015            | 1,864                     |
| <i>Otoba parvifolia</i> _DN9151*      | 183                       | 4         | n/a                           | 1989            | 3,870                     |
| <i>Otoba parvifolia</i> _MN37243      | 173.47                    | 17        | 28,315                        | 1988            | 1,449                     |
| <i>Otoba parvifolia</i> _MS1182       | 139.5                     | 6         | 72,683                        | 1995            | 2,109                     |
| <i>Otoba parvifolia</i> _RV19070      | 215.62                    | 86        | n/a                           | 1994            | 2,095                     |
| <i>Otoba sp. nov.</i> _JP16902*       | 145.41                    | 17        | n/a                           | 1992            | 2,438                     |
| <i>Otoba sp. nov.</i> _RC5752*        | 126                       | 5         | n/a                           | 1987            | 3,732                     |
| <i>Otoba vespertilio</i> _GM12543     | 131                       | 3         | 1,532                         | 1988            | 3,561                     |

**Appendix S4.** Heatmap showing the percent reference protein length recovered for all samples across all 353 loci.

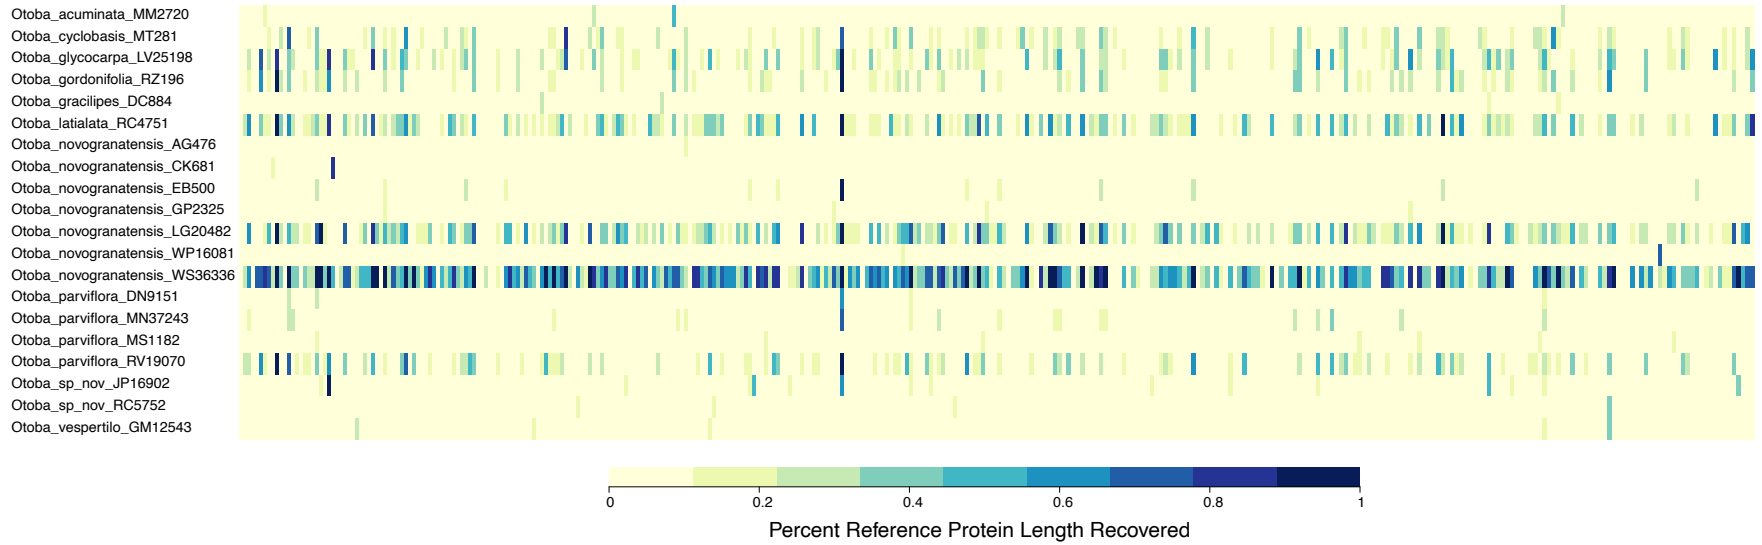

**Appendix S5.** Divergence date estimations of *Otoba* using difference calibration schema (denoted to left of phylogeny).

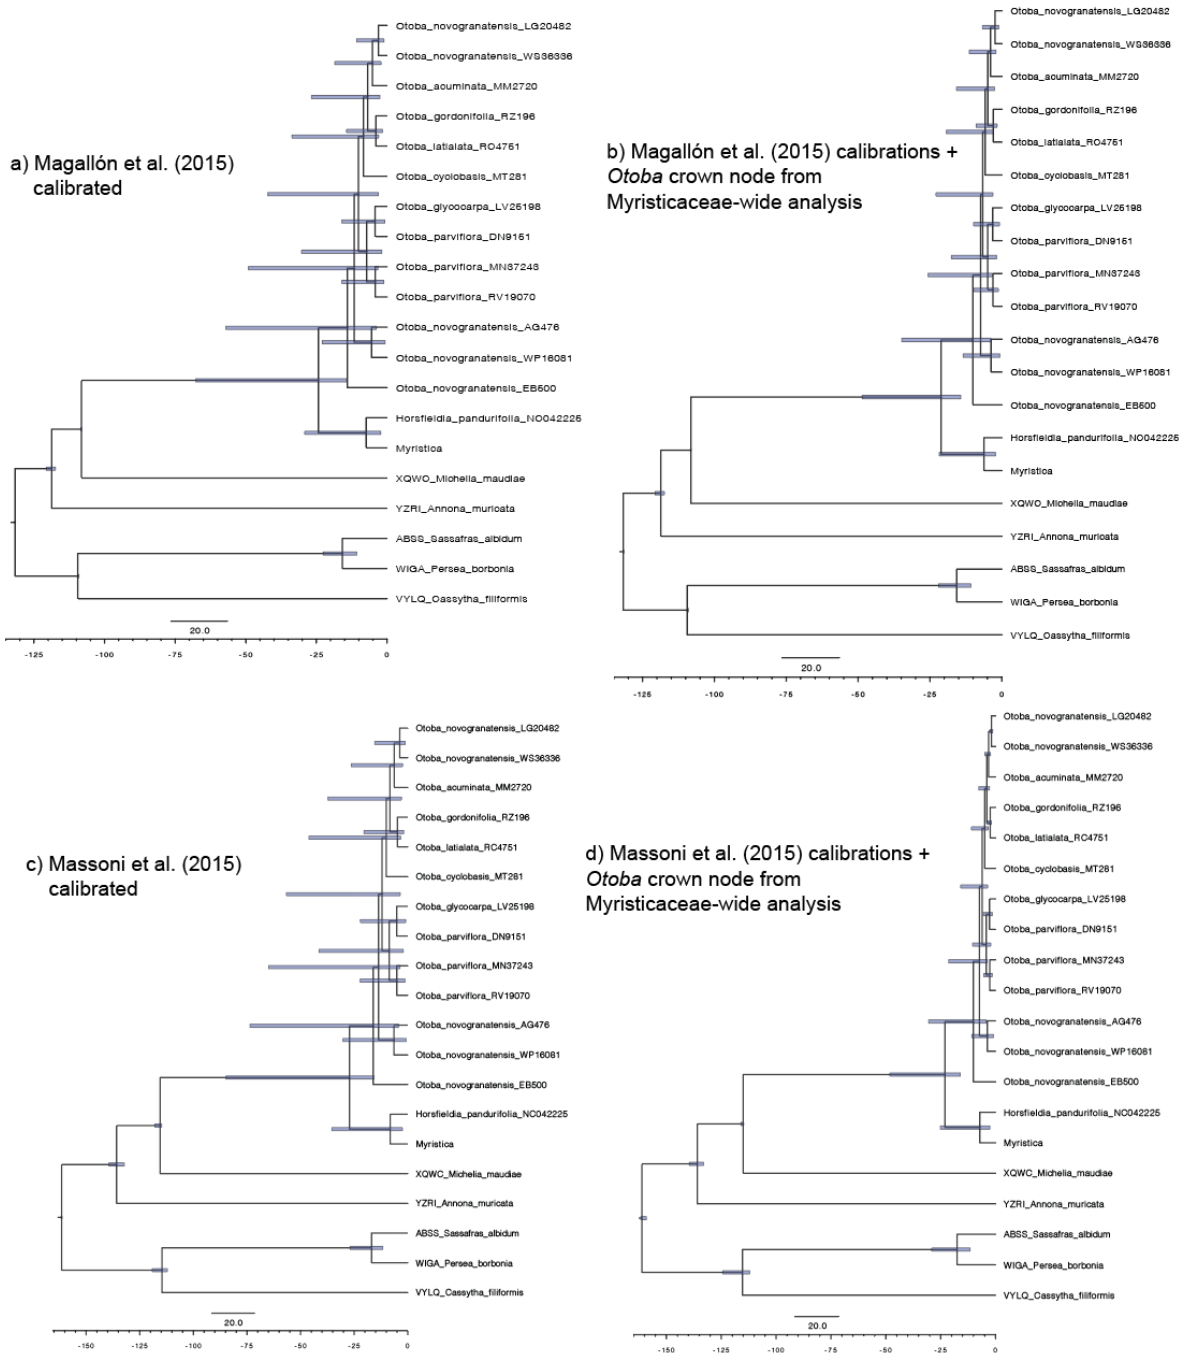

**Figure S5.** treePL divergence date estimations with different calibration schemes. a) and b) include secondary calibrations derived from Magallón et al. (2015) at the nodes corresponding to Laurales + Magnoliales, Laurales, Magnoliales, and Myristicaceae; b) additionally includes a calibration for the crown node of *Otoba* derived from our densely sampled, family-wide BEAST2 analysis of Myristicaceae calibrated with dates from Magallón et al (2015). c) and d) include secondary calibrations derived from Massoni et al. (2015) at the nodes corresponding to Laurales + Magnoliales, Laurales, Magnoliales, and Myristicaceae; d) additionally includes a calibration for the crown node of *Otoba* derived from our densely sampled, family-wide BEAST2 analysis of Myristicaceae calibrated with dates from Massoni et al (2015). Bars at nodes represent 95% confidence intervals as inferred across 100 RAxML bootstrap replicates.

**Appendix S6.** Divergence date estimation from BEAST2 analysis of Myristiaceae using the Magallón et al. (2015) calibration scheme. Values at nodes correspond to the posterior probability, while bars at nodes represented the 95% HPD on the estimated age of the node, with time scale below phylogeny in millions of years before present. (Figure on next page)



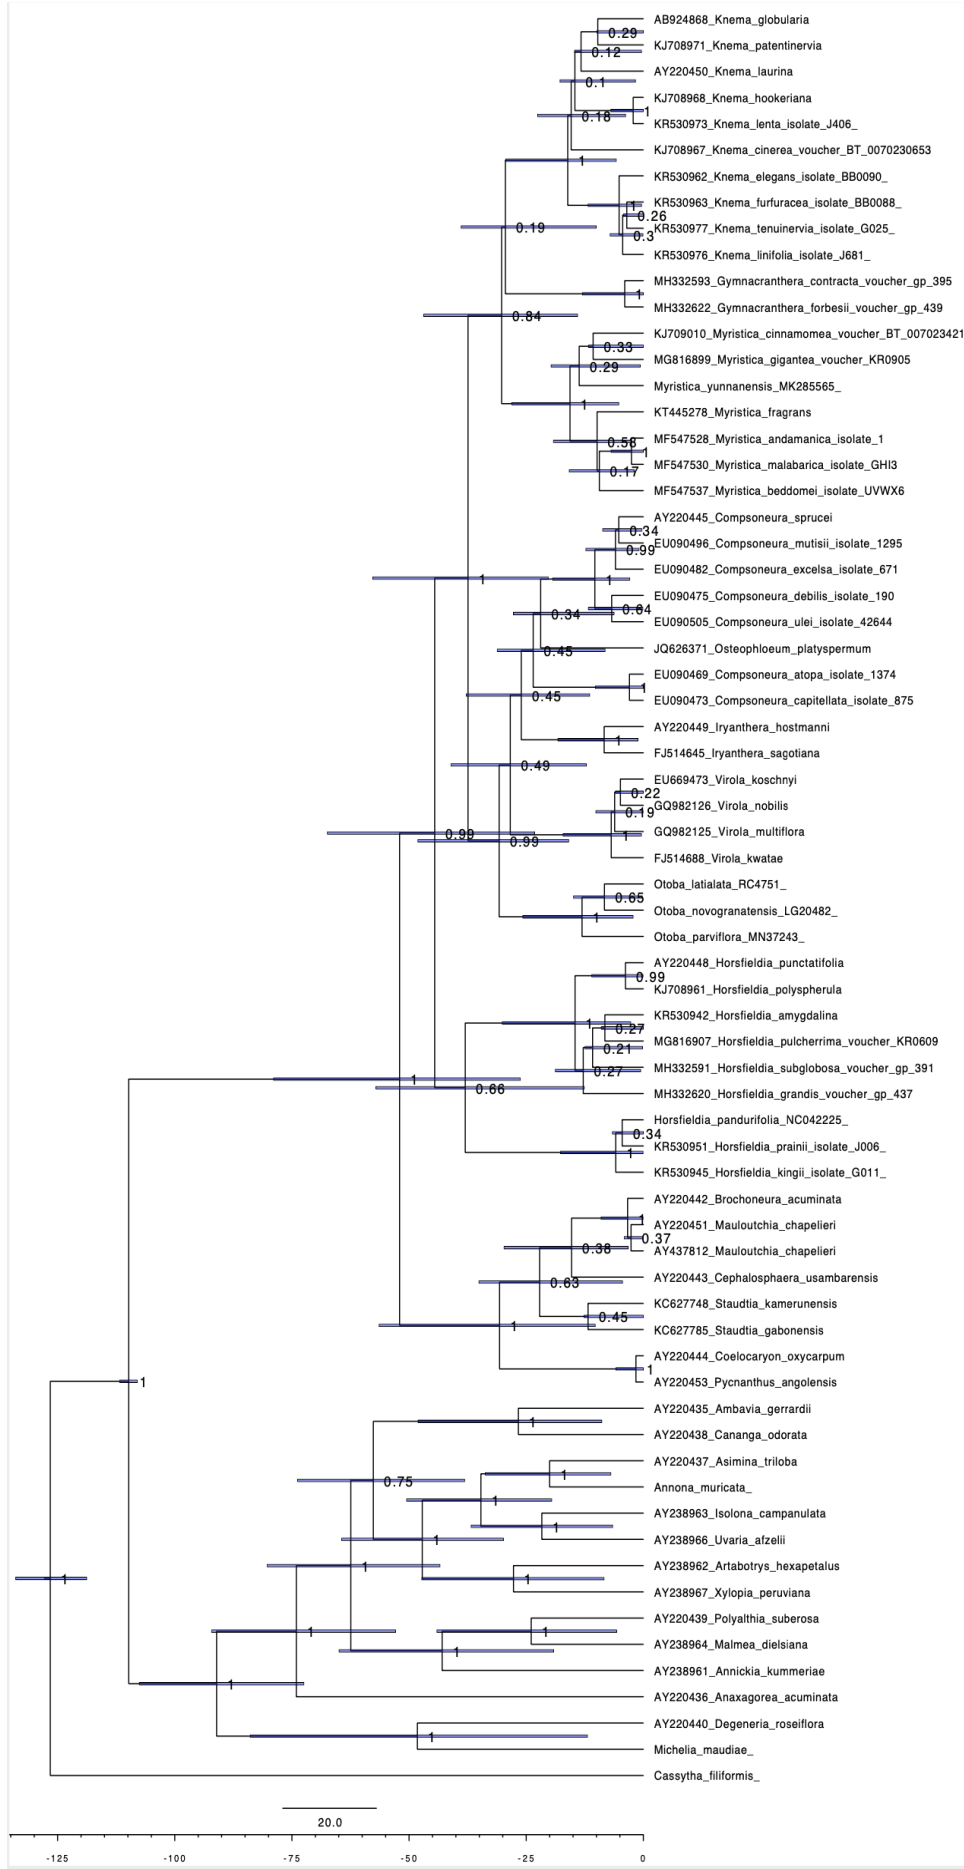

**Appendix S7.** Divergence date estimation from BEAST2 analysis of Myristicaceae using the Massoni et al. (2015) calibration scheme. Values at nodes correspond to the posterior probability, while bars at nodes represented the 95% HPD on the estimated age of the node with time scale below phylogeny in millions of years before present. (Figure on next page)

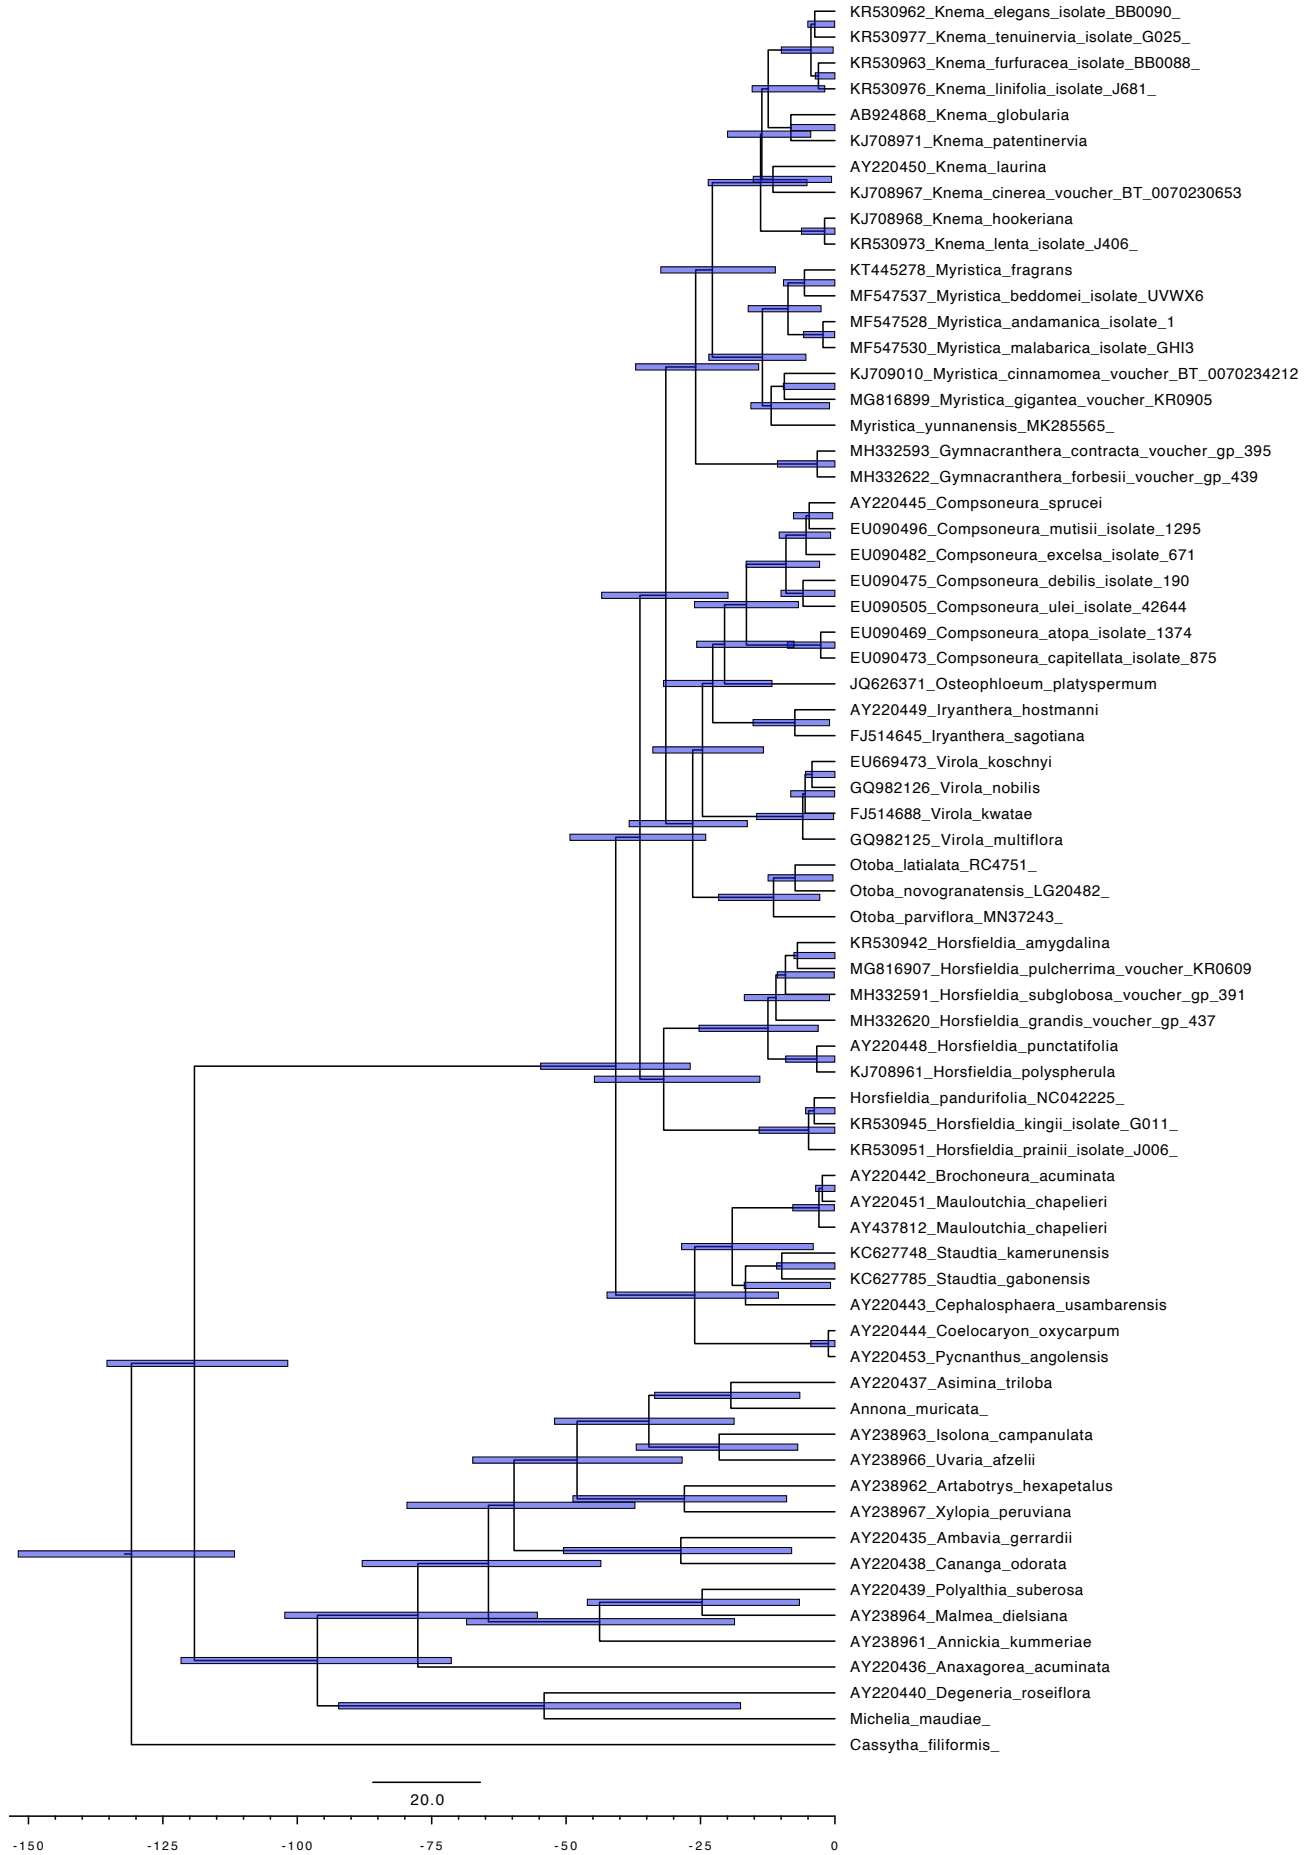

**Appendix S8.** Average values for each BIOCLIM variable and elevation in *Otoba*. A description of each bioclimatic variable can be found on the WorldClim website (<https://www.worldclim.org/data/bioclim.html>).

| species                  | BIO1  | BIO2 | BIO3  | BIO4  | BIO5  | BIO6  | BIO7  | BIO8  | BIO9  | BIO10 | BIO11 | BIO12   | BIO13  | BIO14  | BIO15 | BIO16   | BIO17  | BIO18  | BIO19   | Elevation |
|--------------------------|-------|------|-------|-------|-------|-------|-------|-------|-------|-------|-------|---------|--------|--------|-------|---------|--------|--------|---------|-----------|
| <i>acuminata</i>         | 24.64 | 8.05 | 81.37 | 59.04 | 29.81 | 19.92 | 9.89  | 24.43 | 24.92 | 25.45 | 23.99 | 2917.25 | 413.34 | 66.94  | 48.61 | 1066.25 | 275.81 | 522.28 | 852.25  | 404.84    |
| <i>cyclobasis</i>        | 23.72 | 8.52 | 87.41 | 33.67 | 28.73 | 18.97 | 9.76  | 24.08 | 23.48 | 24.17 | 23.38 | 2224.57 | 283.14 | 100.43 | 35.38 | 794.71  | 356.86 | 741.43 | 429.71  | 405.86    |
| <i>glycyarpa</i>         | 24.04 | 9.53 | 82.77 | 50.71 | 29.60 | 18.08 | 11.51 | 23.93 | 23.97 | 24.54 | 23.32 | 2927.28 | 337.47 | 162.28 | 26.65 | 952.24  | 515.58 | 682.83 | 714.08  | 543.70    |
| <i>gordonifolia</i>      | 19.46 | 8.93 | 88.10 | 36.04 | 24.58 | 14.42 | 10.15 | 19.52 | 19.40 | 19.89 | 19.04 | 2067.50 | 296.54 | 64.08  | 49.44 | 814.19  | 245.00 | 676.53 | 473.68  | 1380.33   |
| <i>latialata</i>         | 24.55 | 8.17 | 86.77 | 38.33 | 29.37 | 19.96 | 9.40  | 24.23 | 24.73 | 25.04 | 24.09 | 4127.77 | 522.05 | 168.54 | 37.46 | 1392.22 | 628.37 | 868.07 | 1248.70 | 448.46    |
| <i>novogranatensisCA</i> | 24.20 | 8.67 | 80.03 | 69.02 | 29.78 | 18.96 | 10.82 | 23.92 | 24.42 | 25.15 | 23.42 | 3031.06 | 473.82 | 46.26  | 56.74 | 1213.22 | 209.37 | 537.39 | 885.85  | 432.73    |
| <i>novogranatensisSA</i> | 22.52 | 8.67 | 87.29 | 39.20 | 27.55 | 17.60 | 9.95  | 22.62 | 22.43 | 23.00 | 22.05 | 2752.89 | 367.19 | 101.41 | 44.34 | 1003.30 | 371.61 | 774.67 | 692.98  | 799.55    |
| <i>parvifolia</i>        | 24.18 | 9.79 | 82.33 | 60.19 | 29.90 | 17.97 | 11.93 | 24.25 | 23.85 | 24.77 | 23.33 | 2710.19 | 325.99 | 135.41 | 32.68 | 918.32  | 438.74 | 677.39 | 593.91  | 511.48    |

**Appendix S9.** Loadings of phylogenetic PCA of BIOCLIM variables in *Otoba*. A description of each bioclimatic variable can be found on the WorldClim website (<https://www.worldclim.org/data/bioclim.html>).

|       | PC1        | PC2         | PC3         | PC4         |
|-------|------------|-------------|-------------|-------------|
| BIO1  | 0.9590468  | 0.14849091  | -0.12600397 | 0.20116525  |
| BIO2  | -0.4602410 | 0.20067826  | -0.77533178 | -0.36089120 |
| BIO3  | -0.4027127 | -0.89055722 | 0.13301025  | 0.08391671  |
| BIO4  | 0.2890433  | 0.92875105  | -0.08879483 | -0.19983694 |
| BIO5  | 0.9271045  | 0.26345593  | -0.20576943 | 0.15920598  |
| BIO6  | 0.9564835  | 0.03836619  | 0.07135413  | 0.27848748  |
| BIO7  | -0.2007299 | 0.56990207  | -0.71722923 | -0.34127397 |
| BIO8  | 0.9319273  | 0.12154685  | -0.17278971 | 0.28132250  |
| BIO9  | 0.9685474  | 0.17064102  | -0.05535913 | 0.17190043  |
| BIO10 | 0.9502414  | 0.22187517  | -0.09810446 | 0.18980573  |
| BIO11 | 0.9617379  | 0.08309425  | -0.09836778 | 0.23662162  |
| BIO12 | 0.9104890  | -0.15241647 | 0.15008476  | -0.35080041 |
| BIO13 | 0.8240385  | 0.09699091  | 0.38962441  | -0.39547895 |
| BIO14 | 0.6495930  | -0.58925208 | -0.42578738 | -0.18673285 |
| BIO15 | -0.3713011 | 0.56788707  | 0.69624654  | -0.16370803 |
| BIO16 | 0.8466405  | 0.01969772  | 0.32392806  | -0.41709562 |
| BIO17 | 0.7224432  | -0.59367026 | -0.27452234 | -0.20035213 |
| BIO18 | 0.3329619  | -0.88486442 | -0.09434808 | -0.17350519 |
| BIO19 | 0.8706295  | -0.06163663 | 0.29534788  | -0.37339337 |

**Appendix S10.** Ancestral state reconstruction of individual phylogenetic principal components of BIOCLIM variables in *Otoba* (See Appendix S9). Analysis conducted with contMap in phytools.

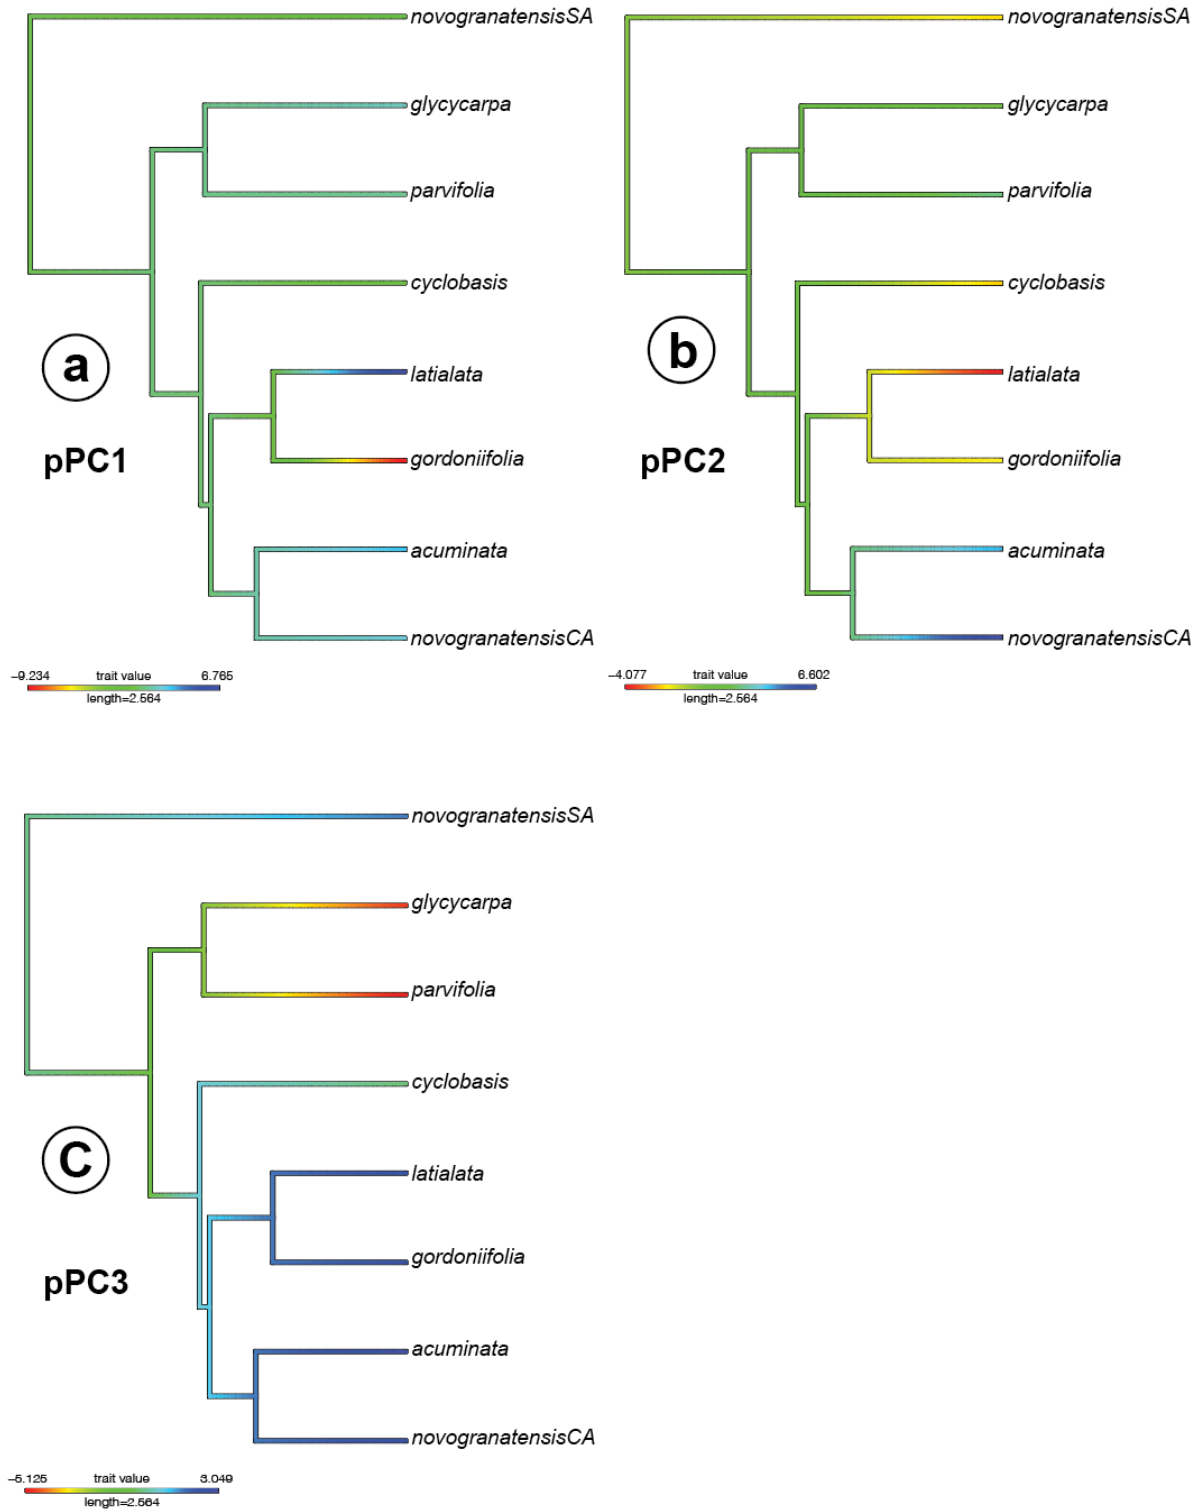

Supplement: Supplementary file [file media-1.pdf]
